# Supplementary material
Source: PubMed Central journal article supplement (PMC6494982)
Supplement: NIHMS1514194-supplement-1.pdf [file NIHMS1514194-supplement-1.pdf]

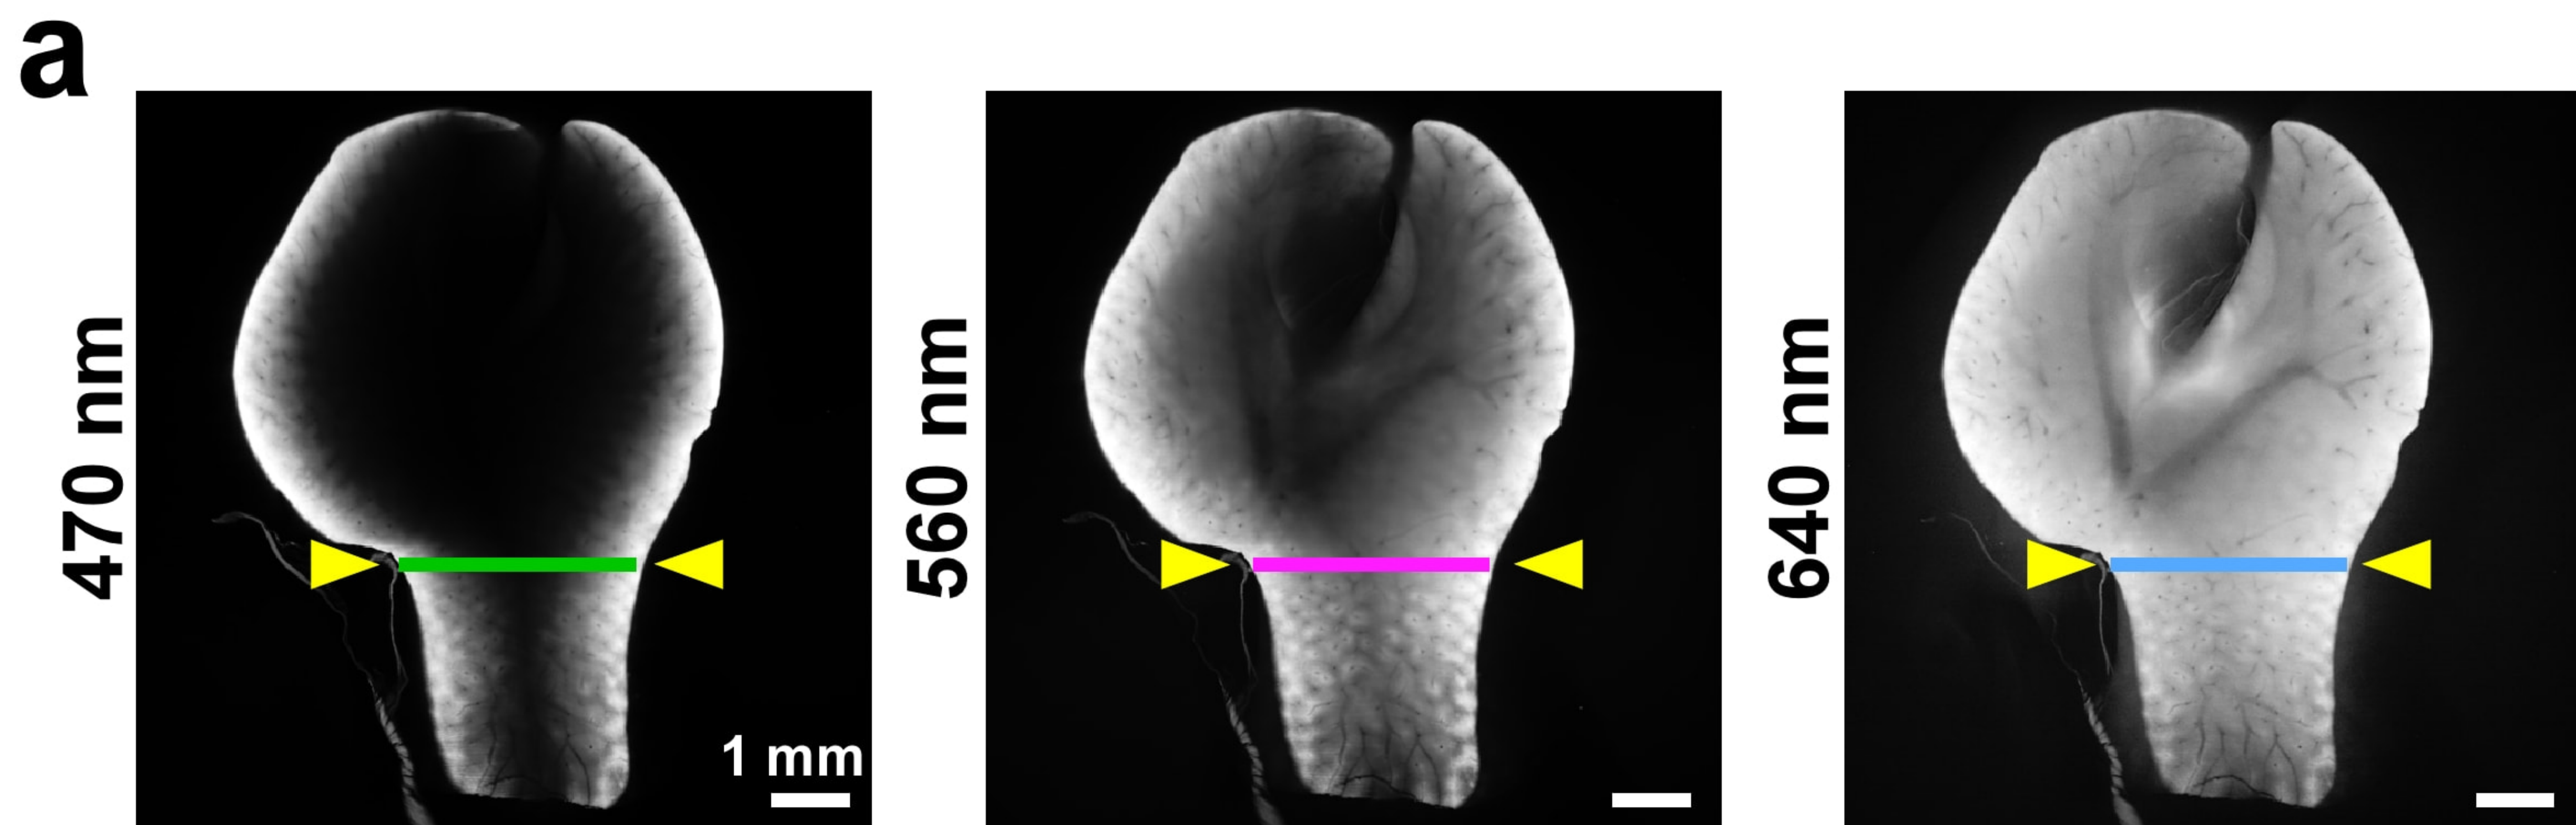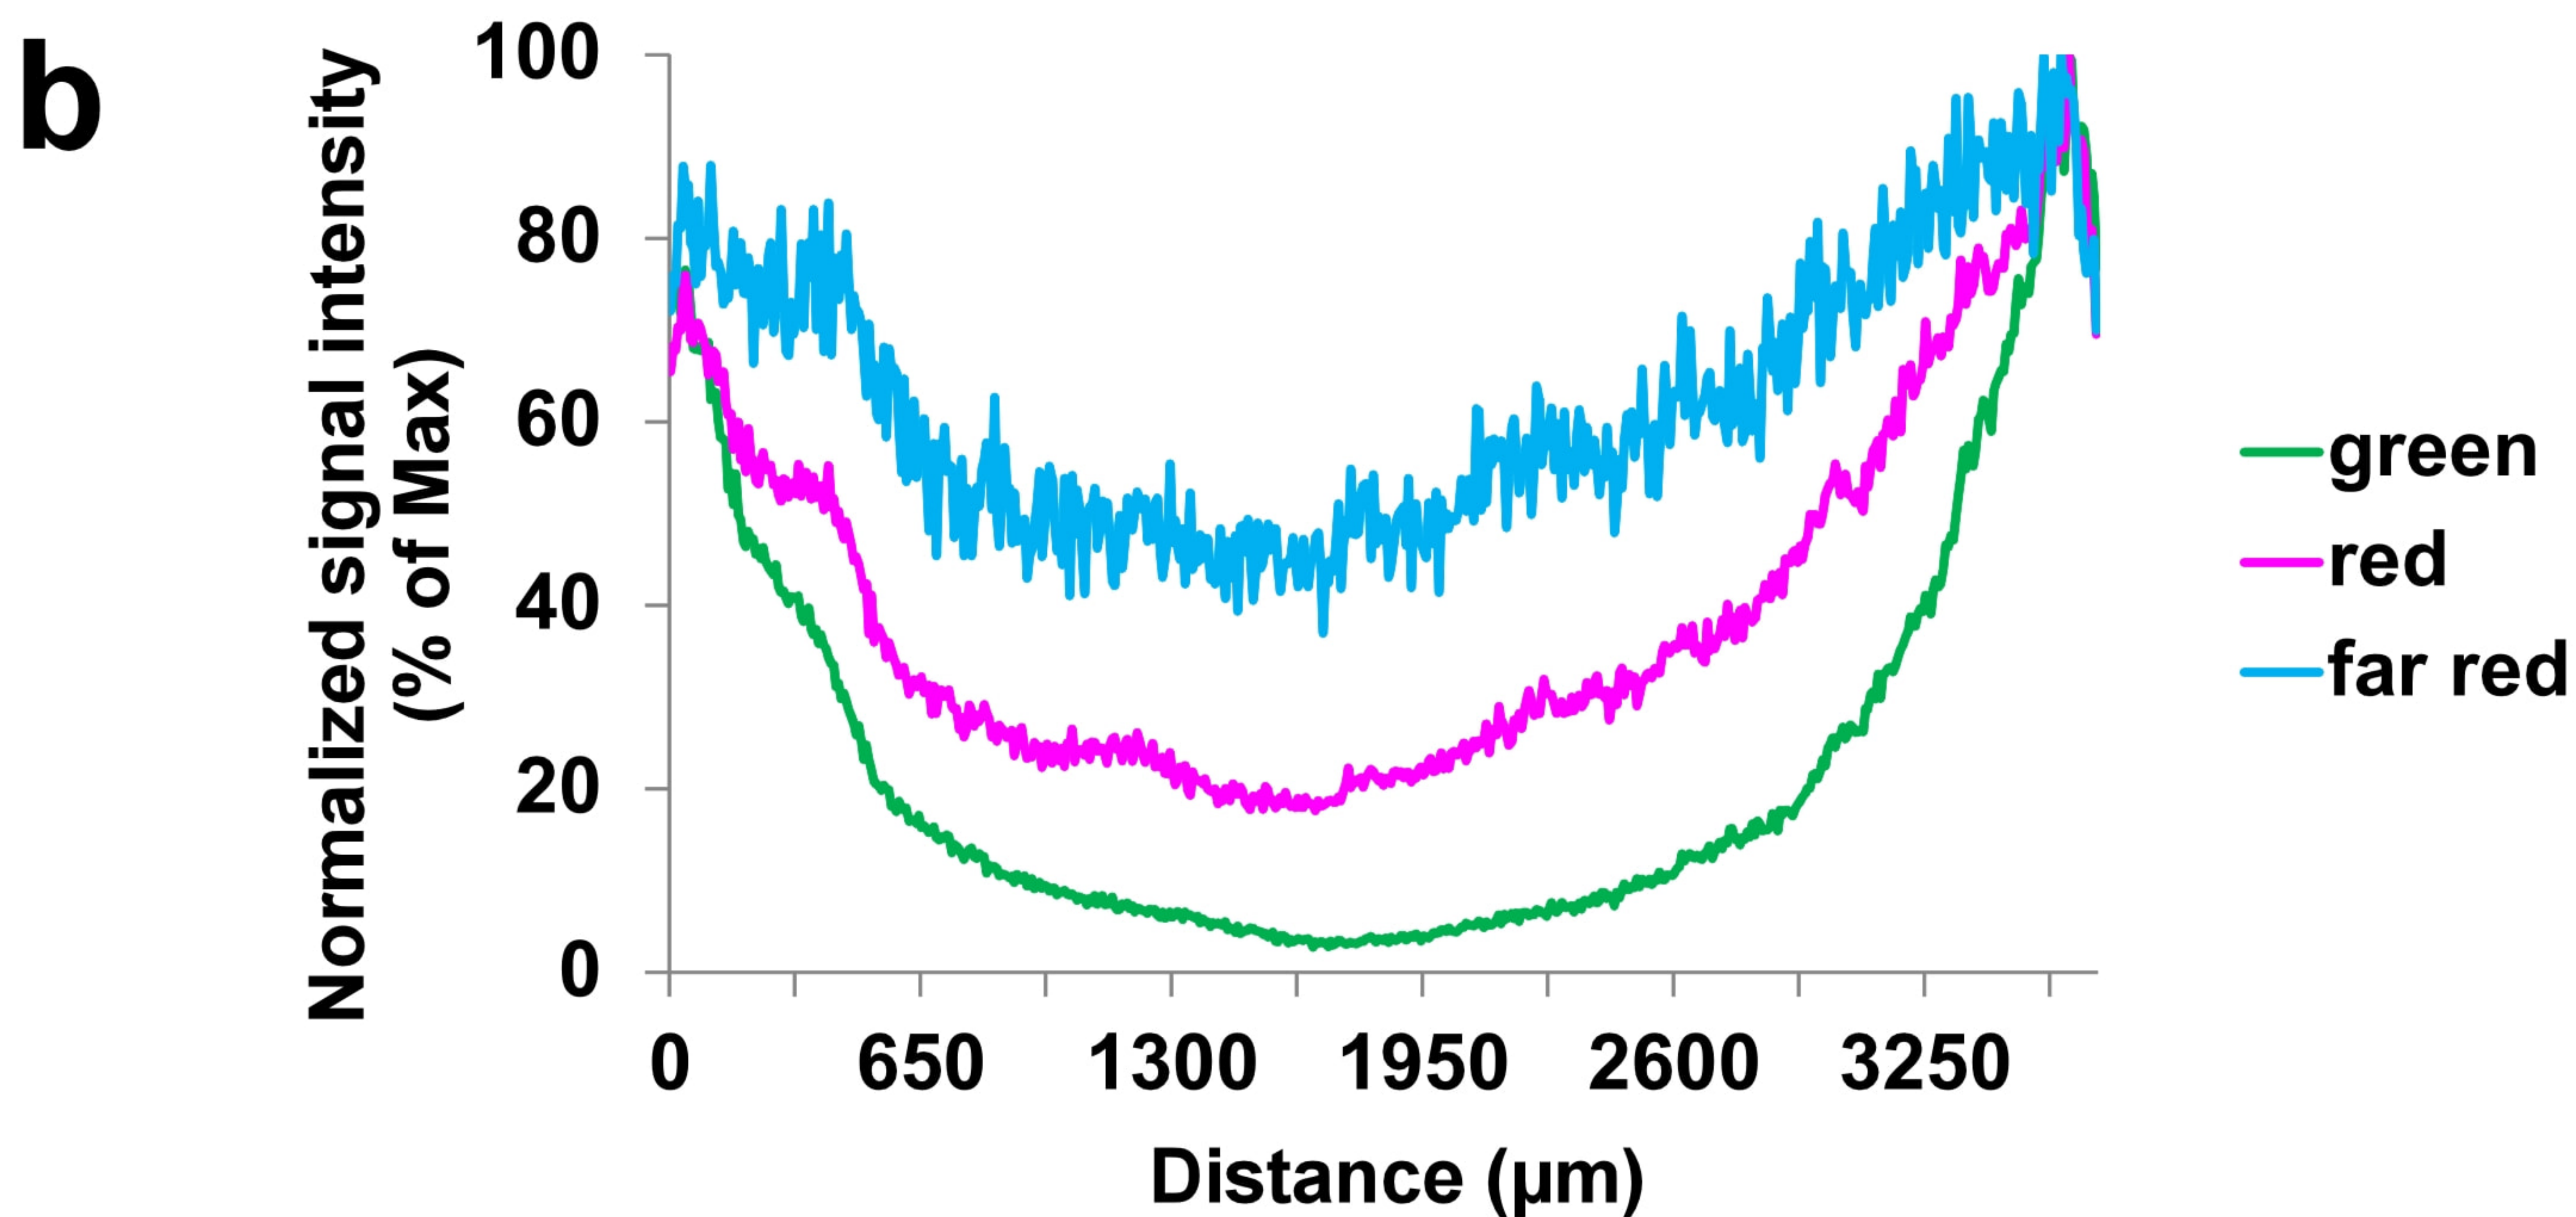

## Supplementary Figure 1

### Light penetration deep in tissue at different wavelengths

(a) Demonstration of tissue penetration of the light at different imaging wavelengths. The same liver region (without any labeling) of a cleared mouse imaged in green (ex: 470 nm) (left), red (ex: 560 nm) (middle) and far-red channels (ex: 640 nm) (right) using light-sheet microscopy. (b) Fluorescence signal intensity profiles normalized over the maximum intensity of the regions indicated by the lines in a. Complete illumination of cleared liver at 640 nm compared to other wavelengths is evident. Similar results were observed in 10 independent animals.



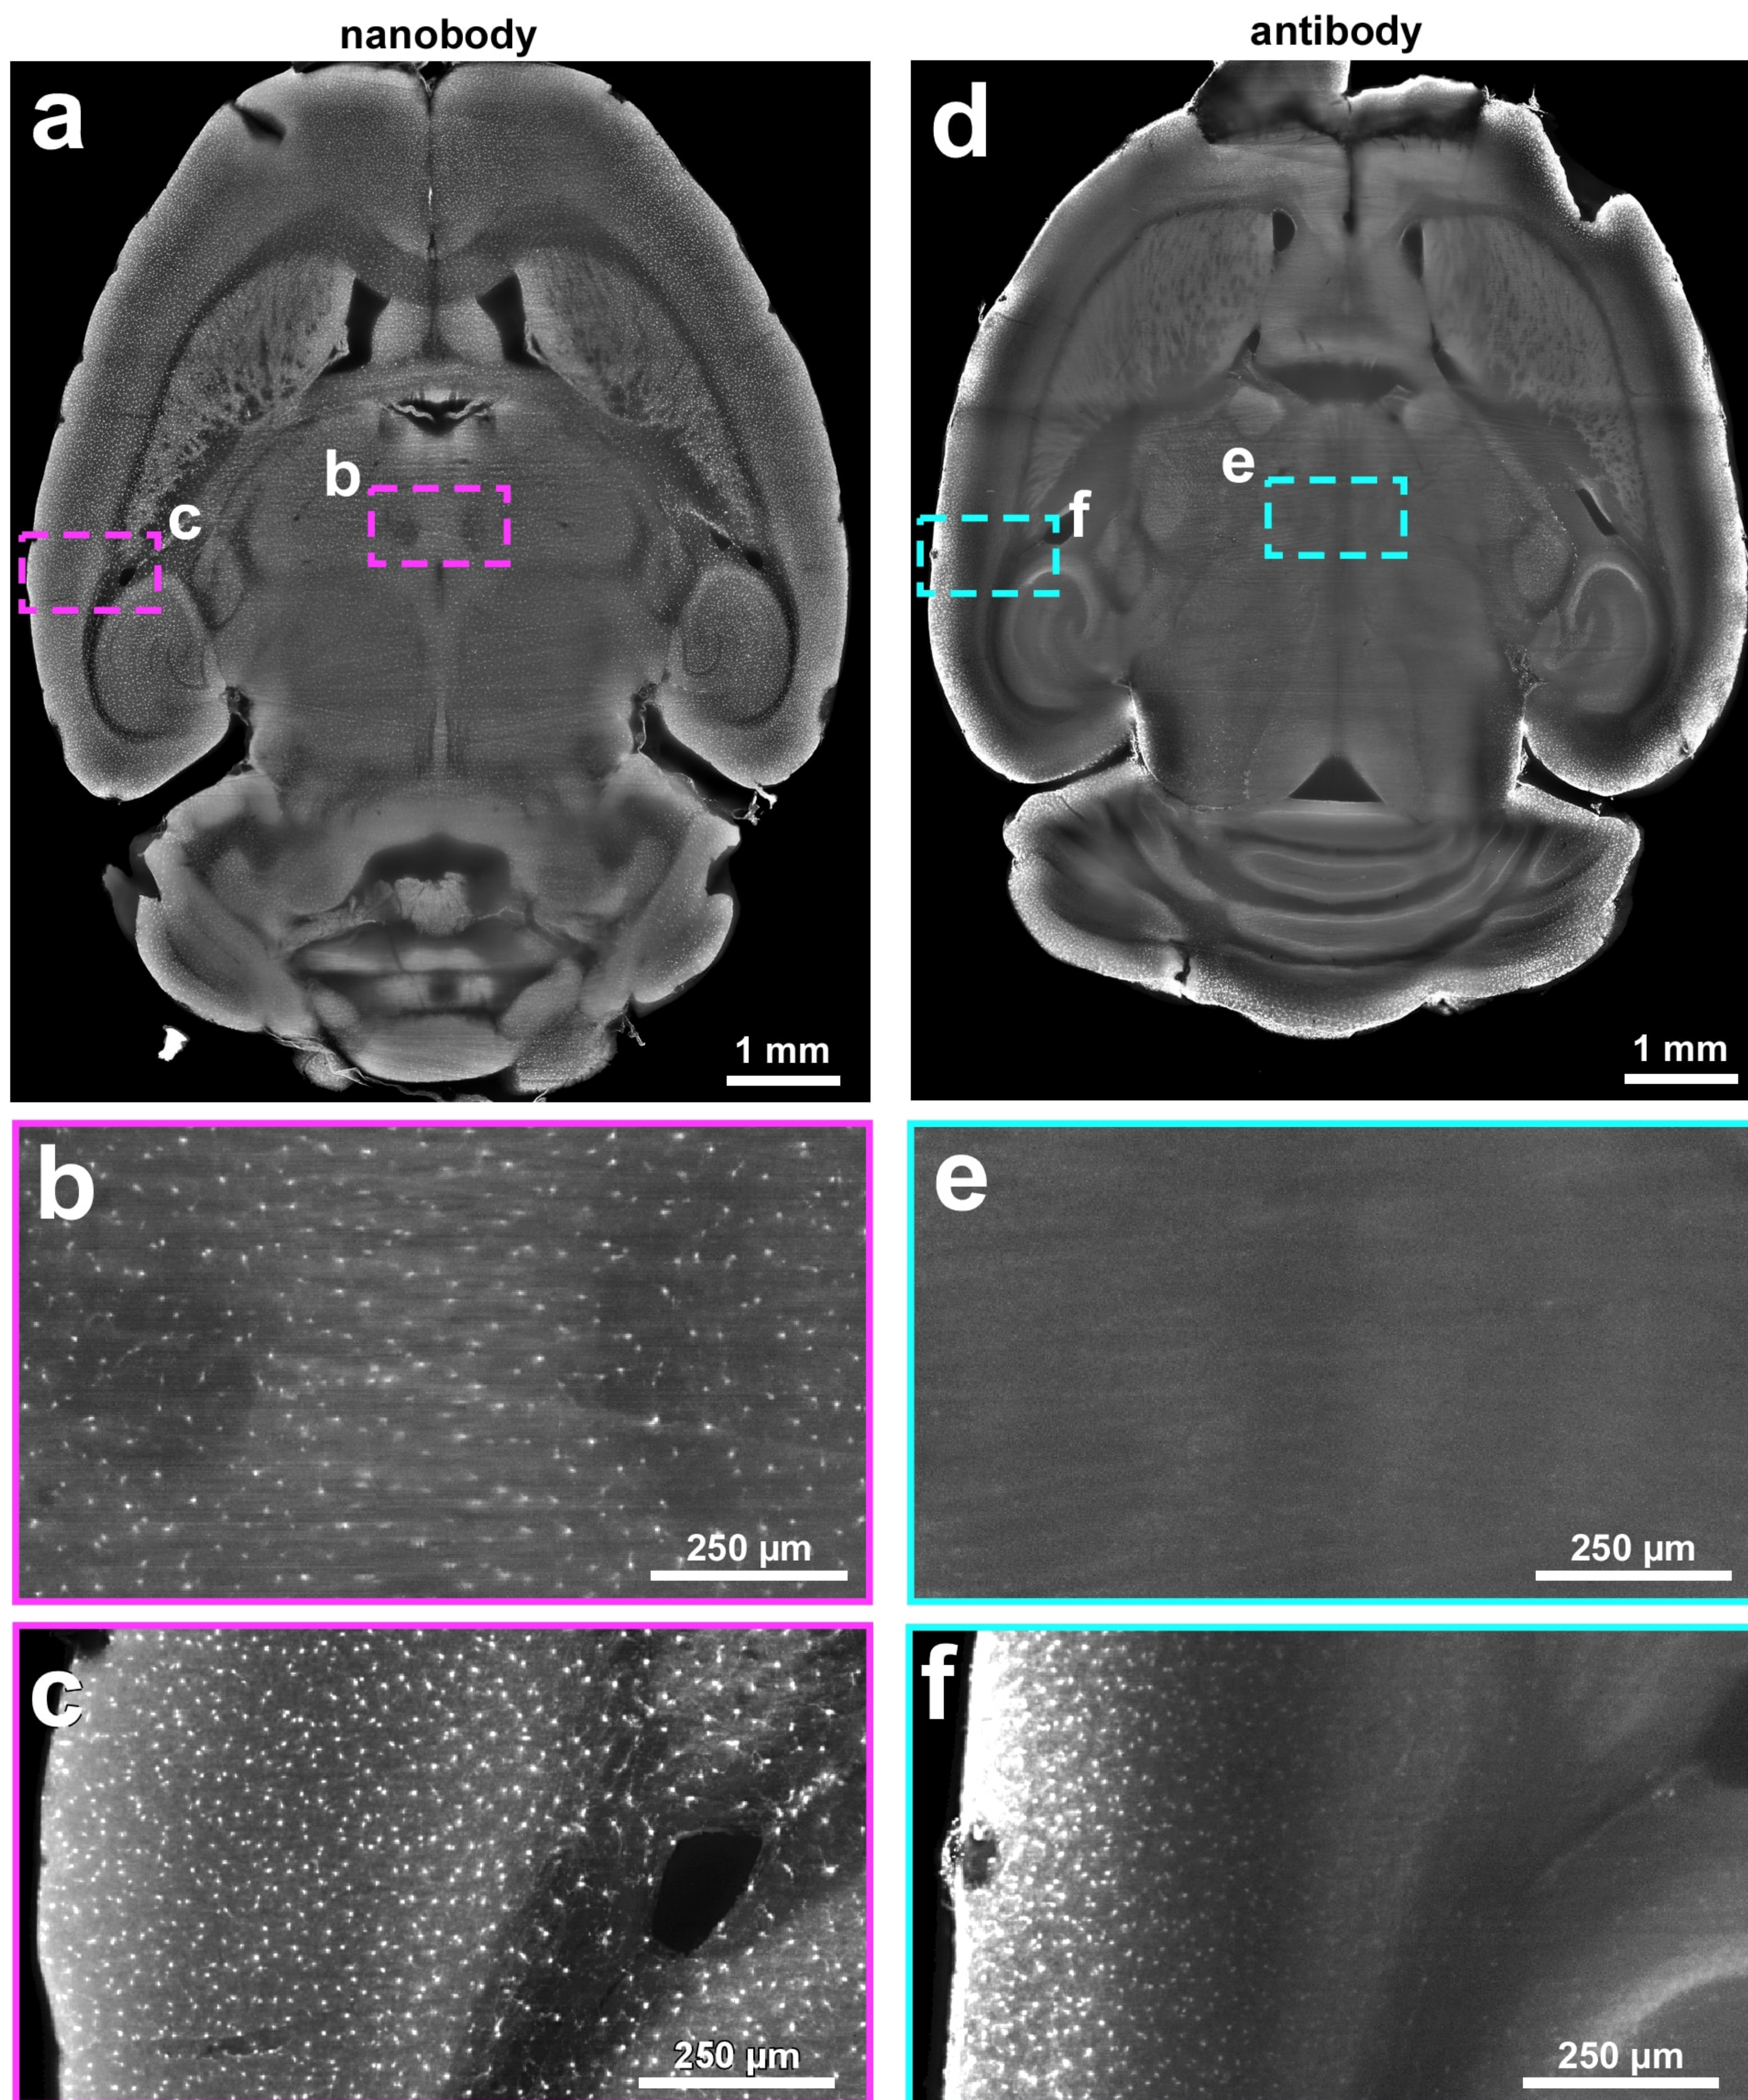

## Supplementary Figure 2

### Deep tissue staining efficiency of nanobody vs conventional antibody

Penetration depth comparison between anti-GFP nanobody (a-c) vs. conventional anti-GFP antibody (d-f) from brains coming from CX3CR1<sup>GFP/+</sup> mice. Representative images of 1 brain from each group consisting of 5 independent animals. (g) Penetration depth quantifications of anti-GFP nanobody vs. conventional anti-GFP antibody stained brains from 5-12 months old CX3CR1<sup>GFP/+</sup> mice (mean  $\pm$  s.d.; n=5 mice per group; statistical significance (\*\*\*\* $p < 0.0001$ ) was assessed by two tailed *t*-test)



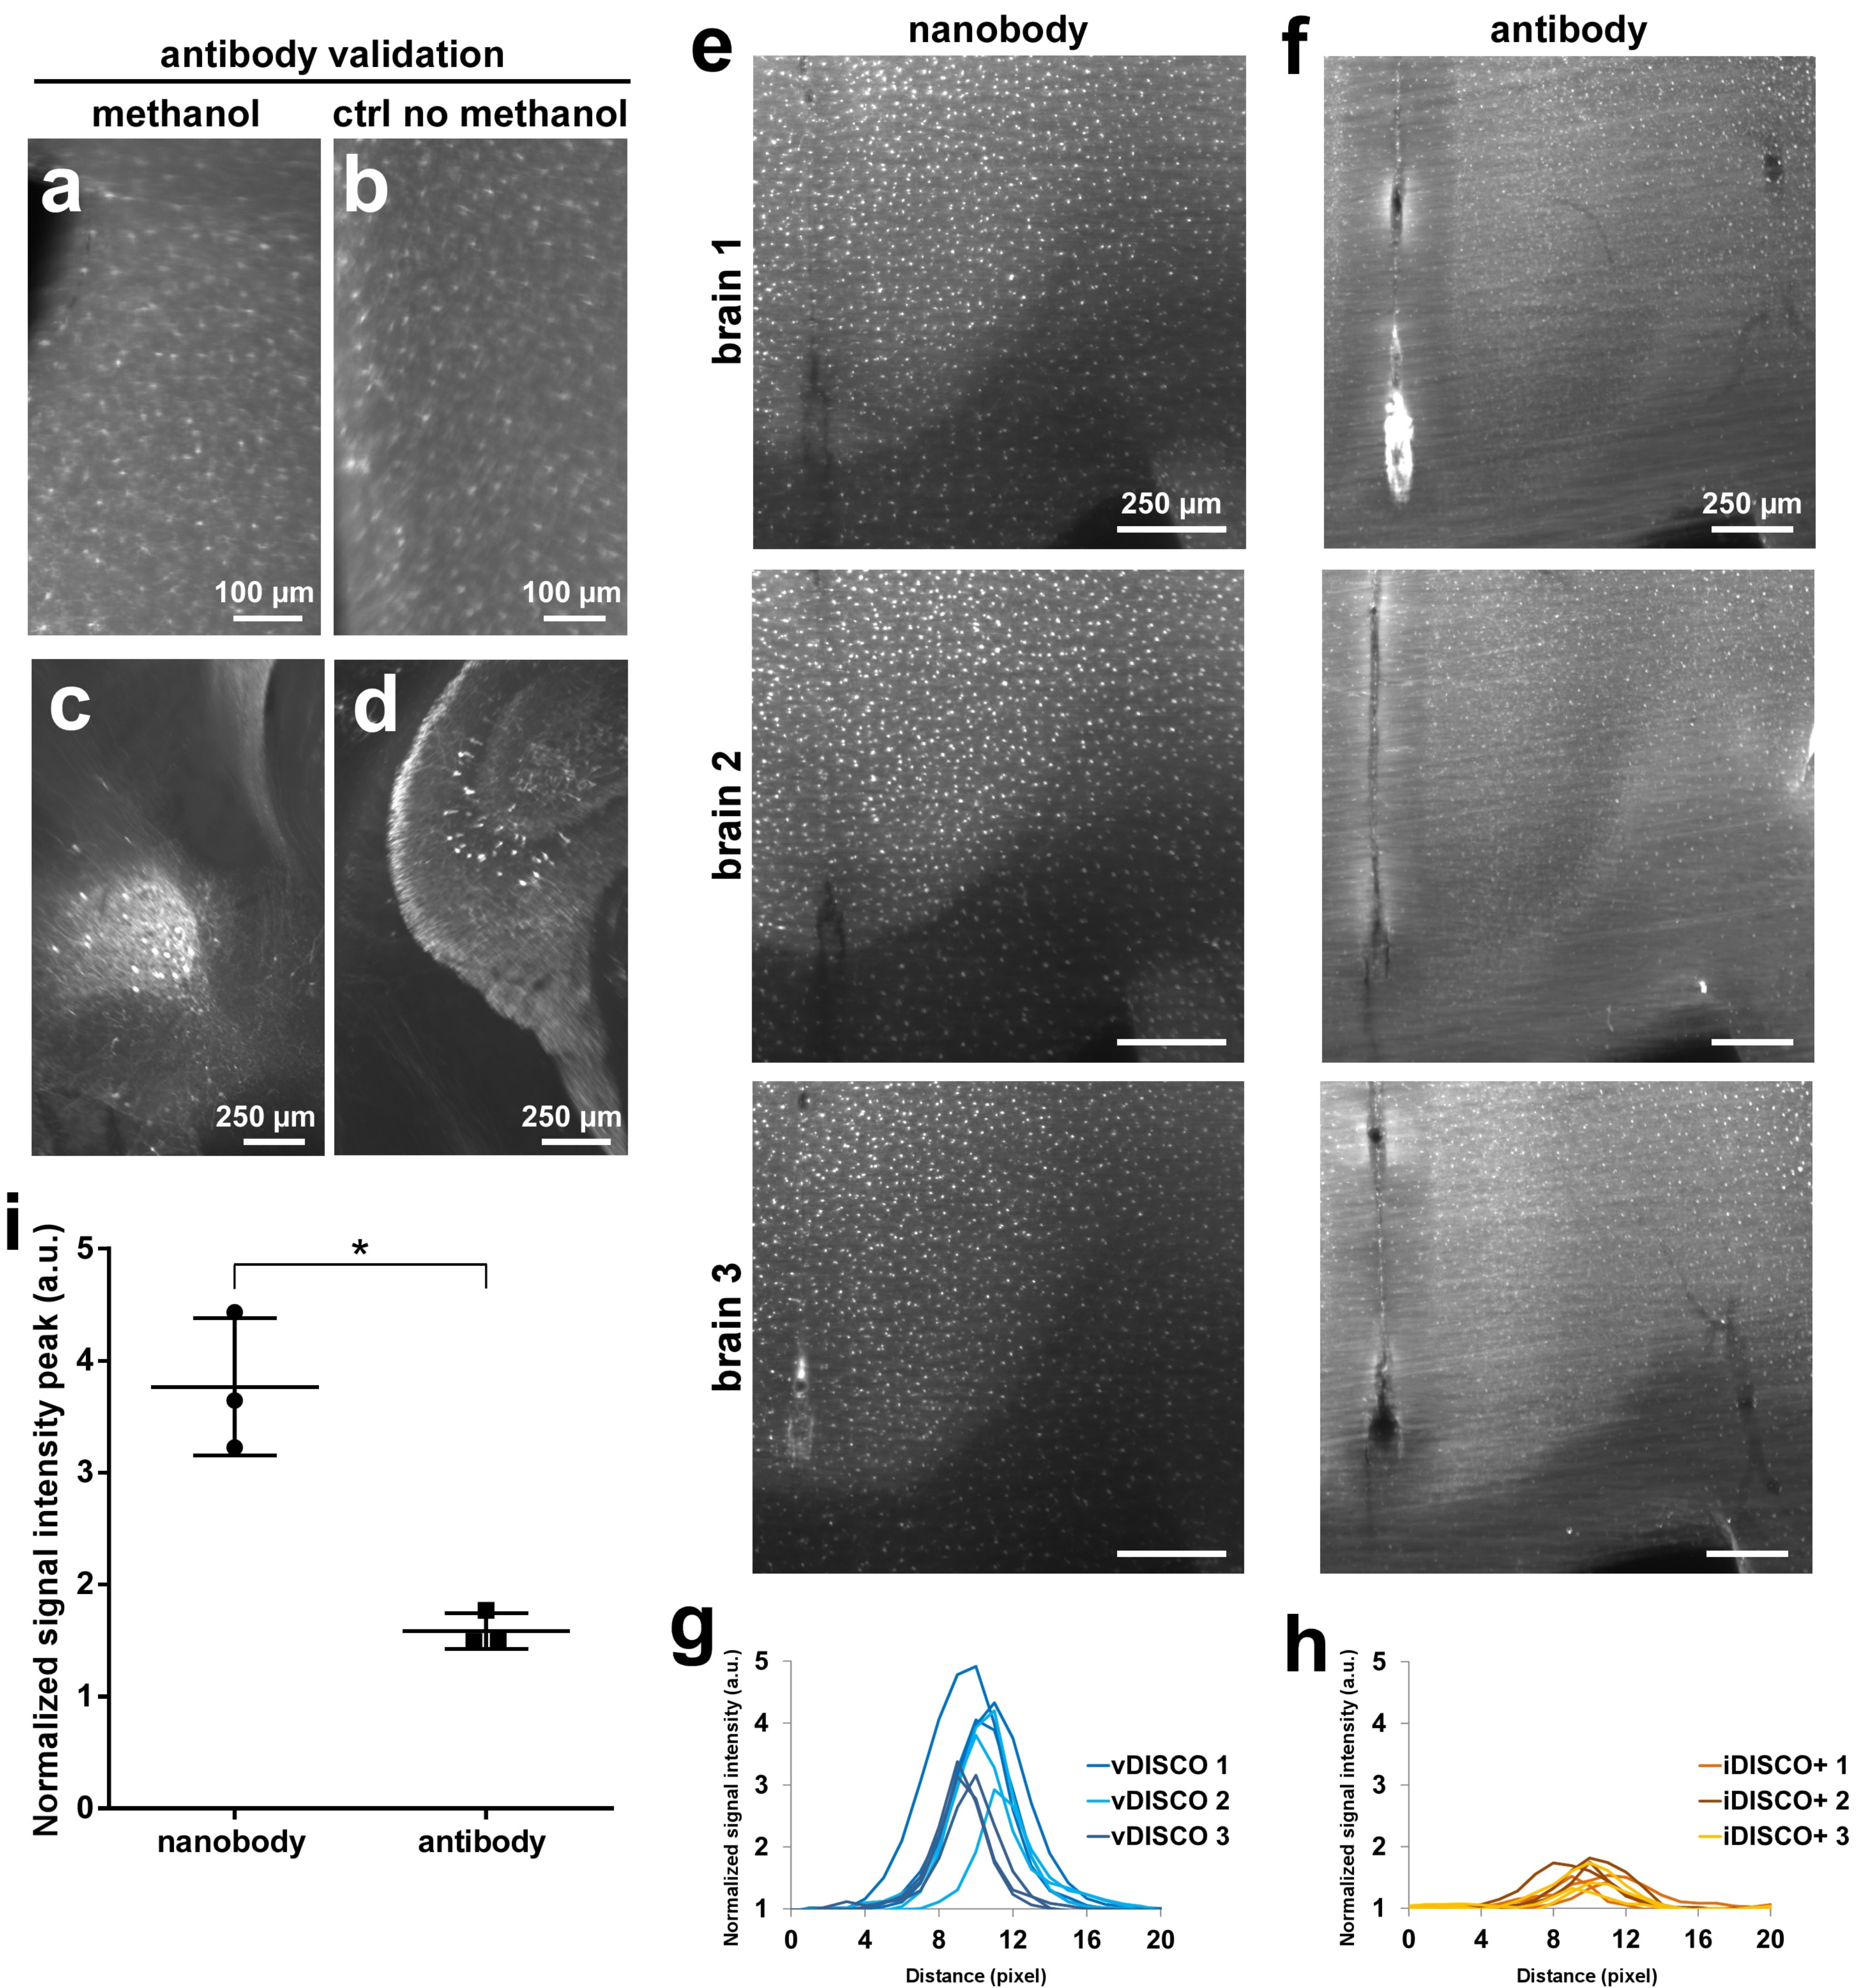

## Supplementary Figure 3

**Compatibility test of conventional anti-GFP antibody with iDISCO+ protocol and comparison between vDISCO passive boosting with anti-GFP nanobooster vs iDISCO+ passive labeling with conventional anti-GFP antibody on CX3CR1<sup>GFP/+</sup> brains**

(a-d) Fluorescent stereomicroscope images of 600 μm brain slices from CX3CR1<sup>GFP/+</sup> animal (a,b), and GFPM animal (both 2-3 months old) (c,d) showing the compatibility of a conventional anti-GFP antibody with methanol pretreatment: (a) slice from CX3CR1<sup>GFP/+</sup> brain and (c) slice from GFPM brain both pretreated with methanol and labeled with the conventional anti-GFP antibody showing the persistence of fluorescence signal compared with: (b) slice from the same CX3CR1 brain and (d) slice from the same GFPM brain labeled with the conventional anti-GFP antibody without methanol pretreatment as positive control. Similar results were observed in 2 independent animals. (e-i) Comparison between passive vDISCO boosting with anti-GFP nanobooster (conjugated with Atto-647N) vs. passive iDISCO+ labeling with the tested conventional anti-GFP antibody (conjugated with Alexa-647) on CX3CR1<sup>GFP/+</sup> whole brains from 5-7 months old mice: (e,f) light-sheet images showing the difference in labeling after vDISCO (e) vs. iDISCO+ (f) at the level of the same anatomical region (cortex and corpus callosum) in 3 different independent brains per each group; (g,h) plots of signal intensity profiles from vDISCO boosted brains in e (g) and iDISCO+ labeled brains in f (h); (i) Comparison of the peaks of the signal intensity profiles in g vs. h (mean ± s.d., n=3 animals per group, statistical significance (\**p* = 0.02) was assessed by two tailed *t*-test).



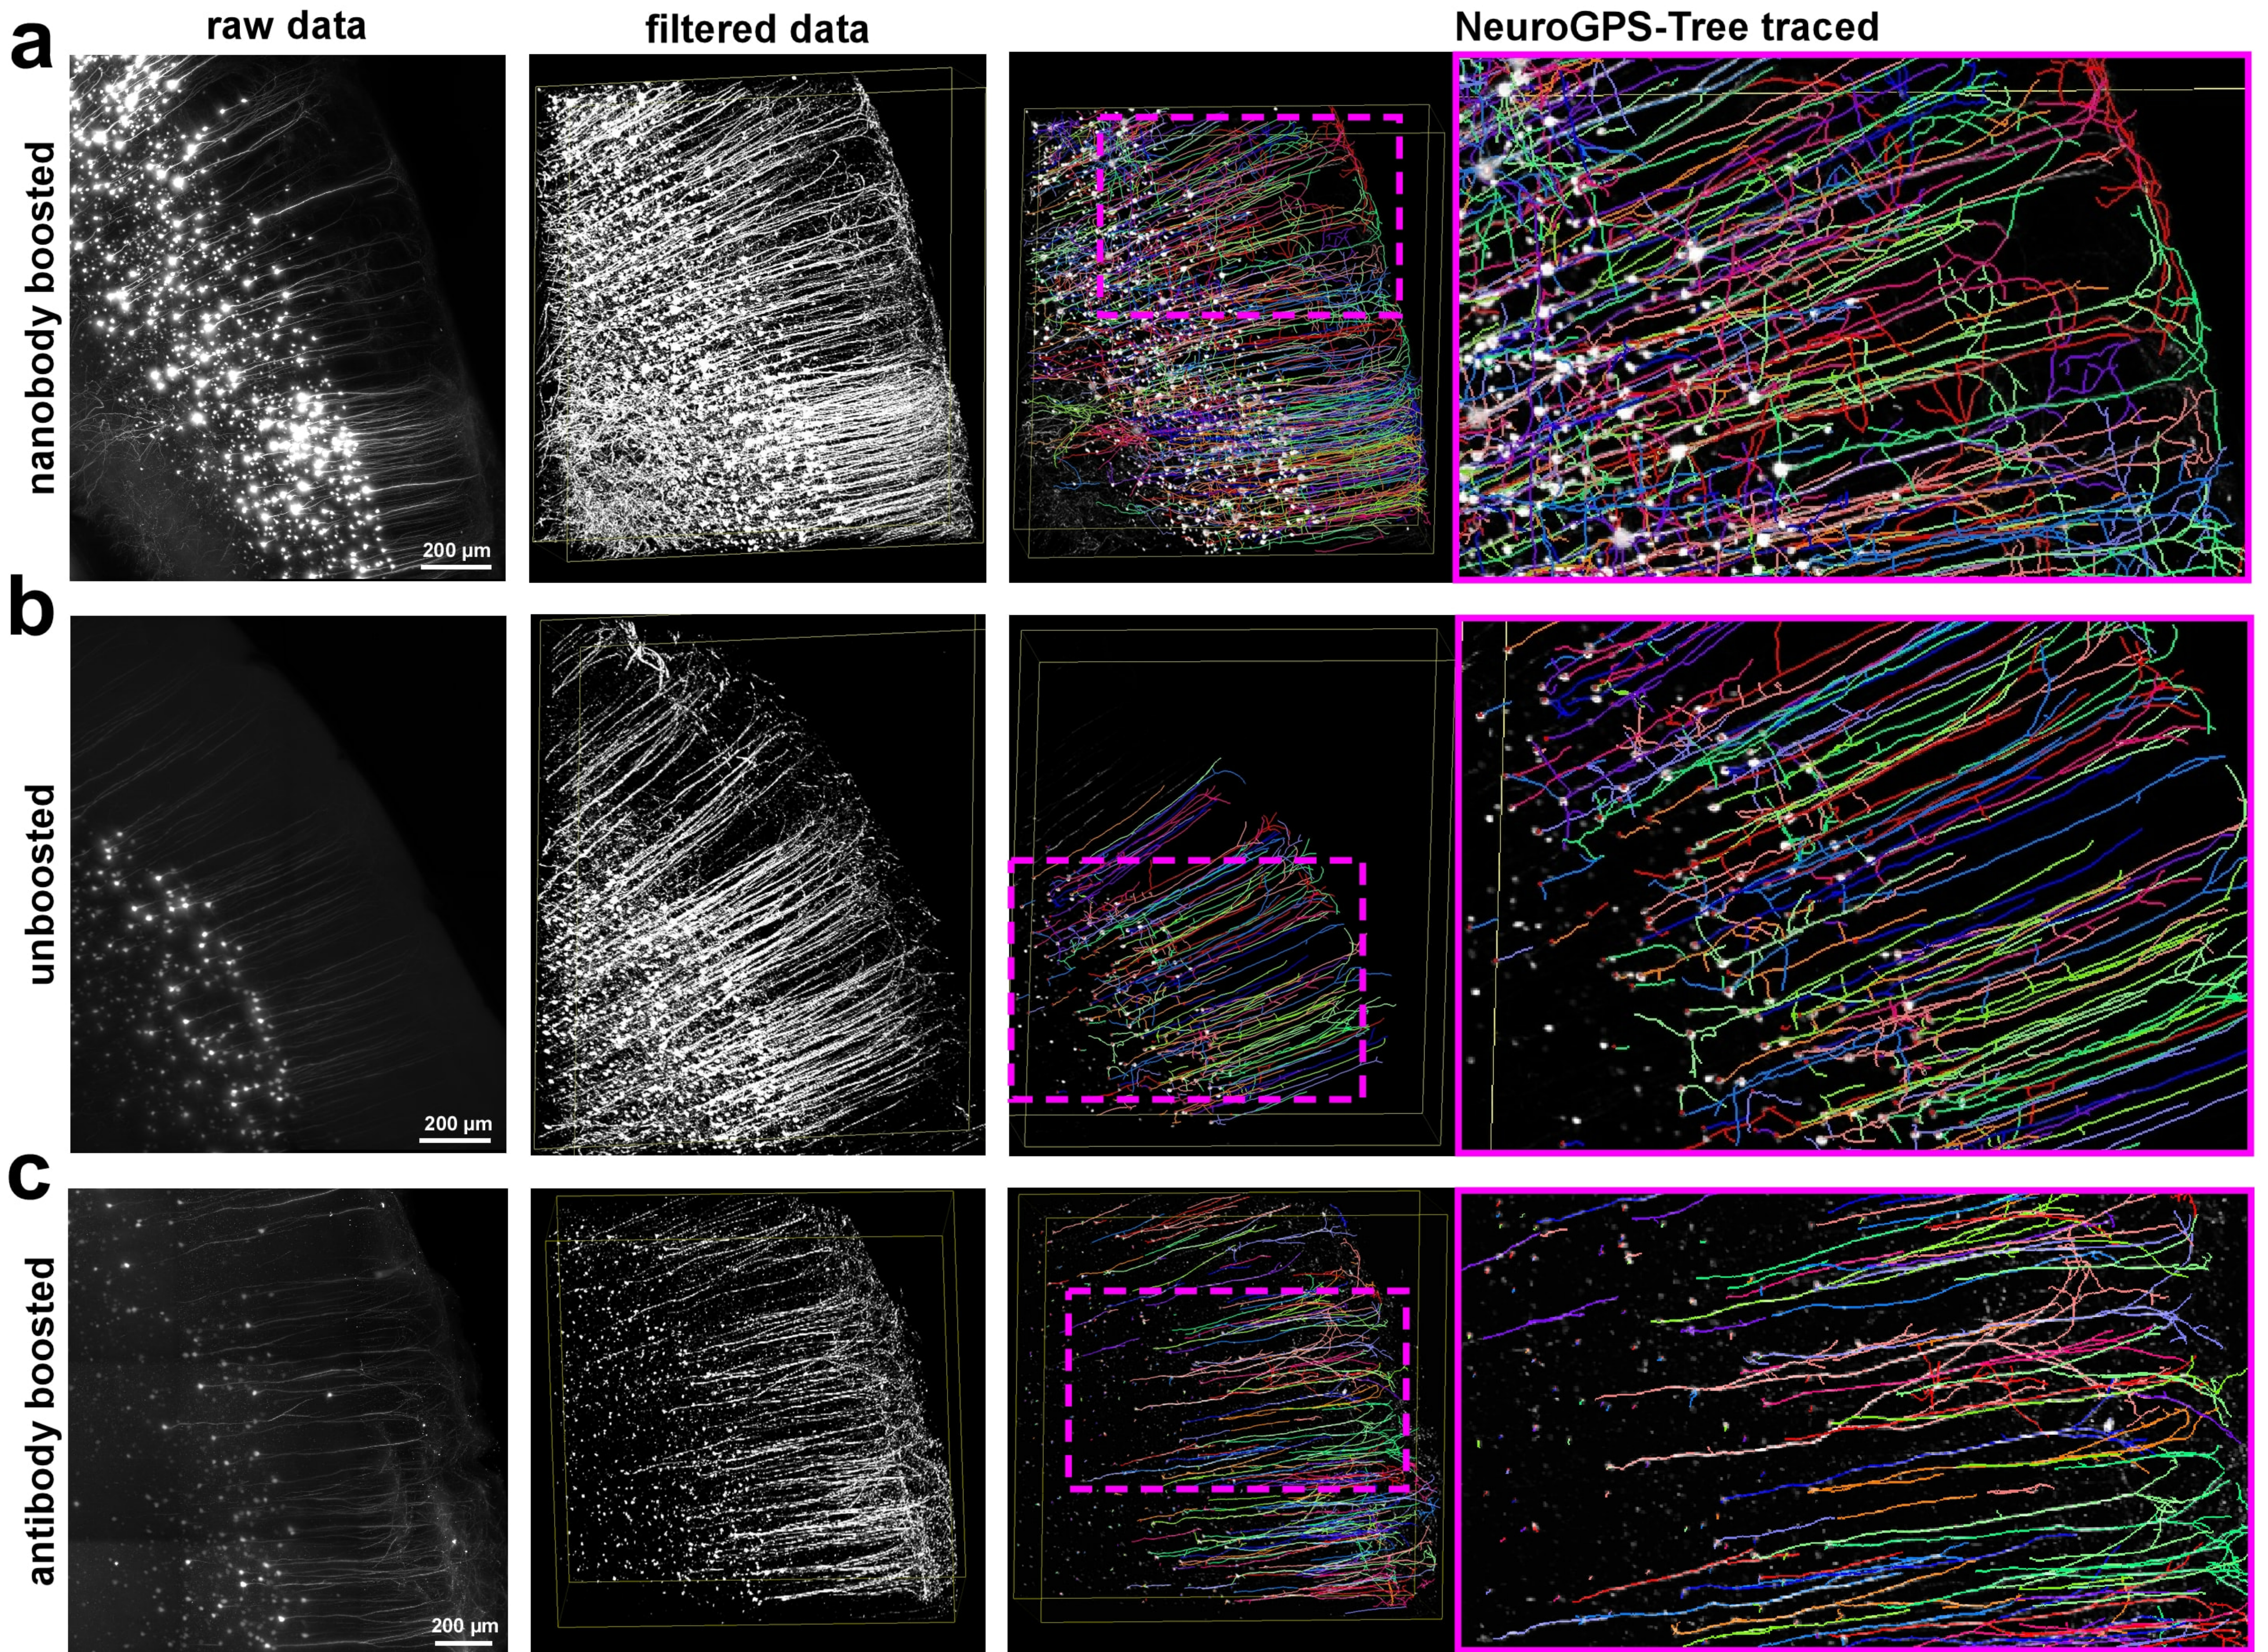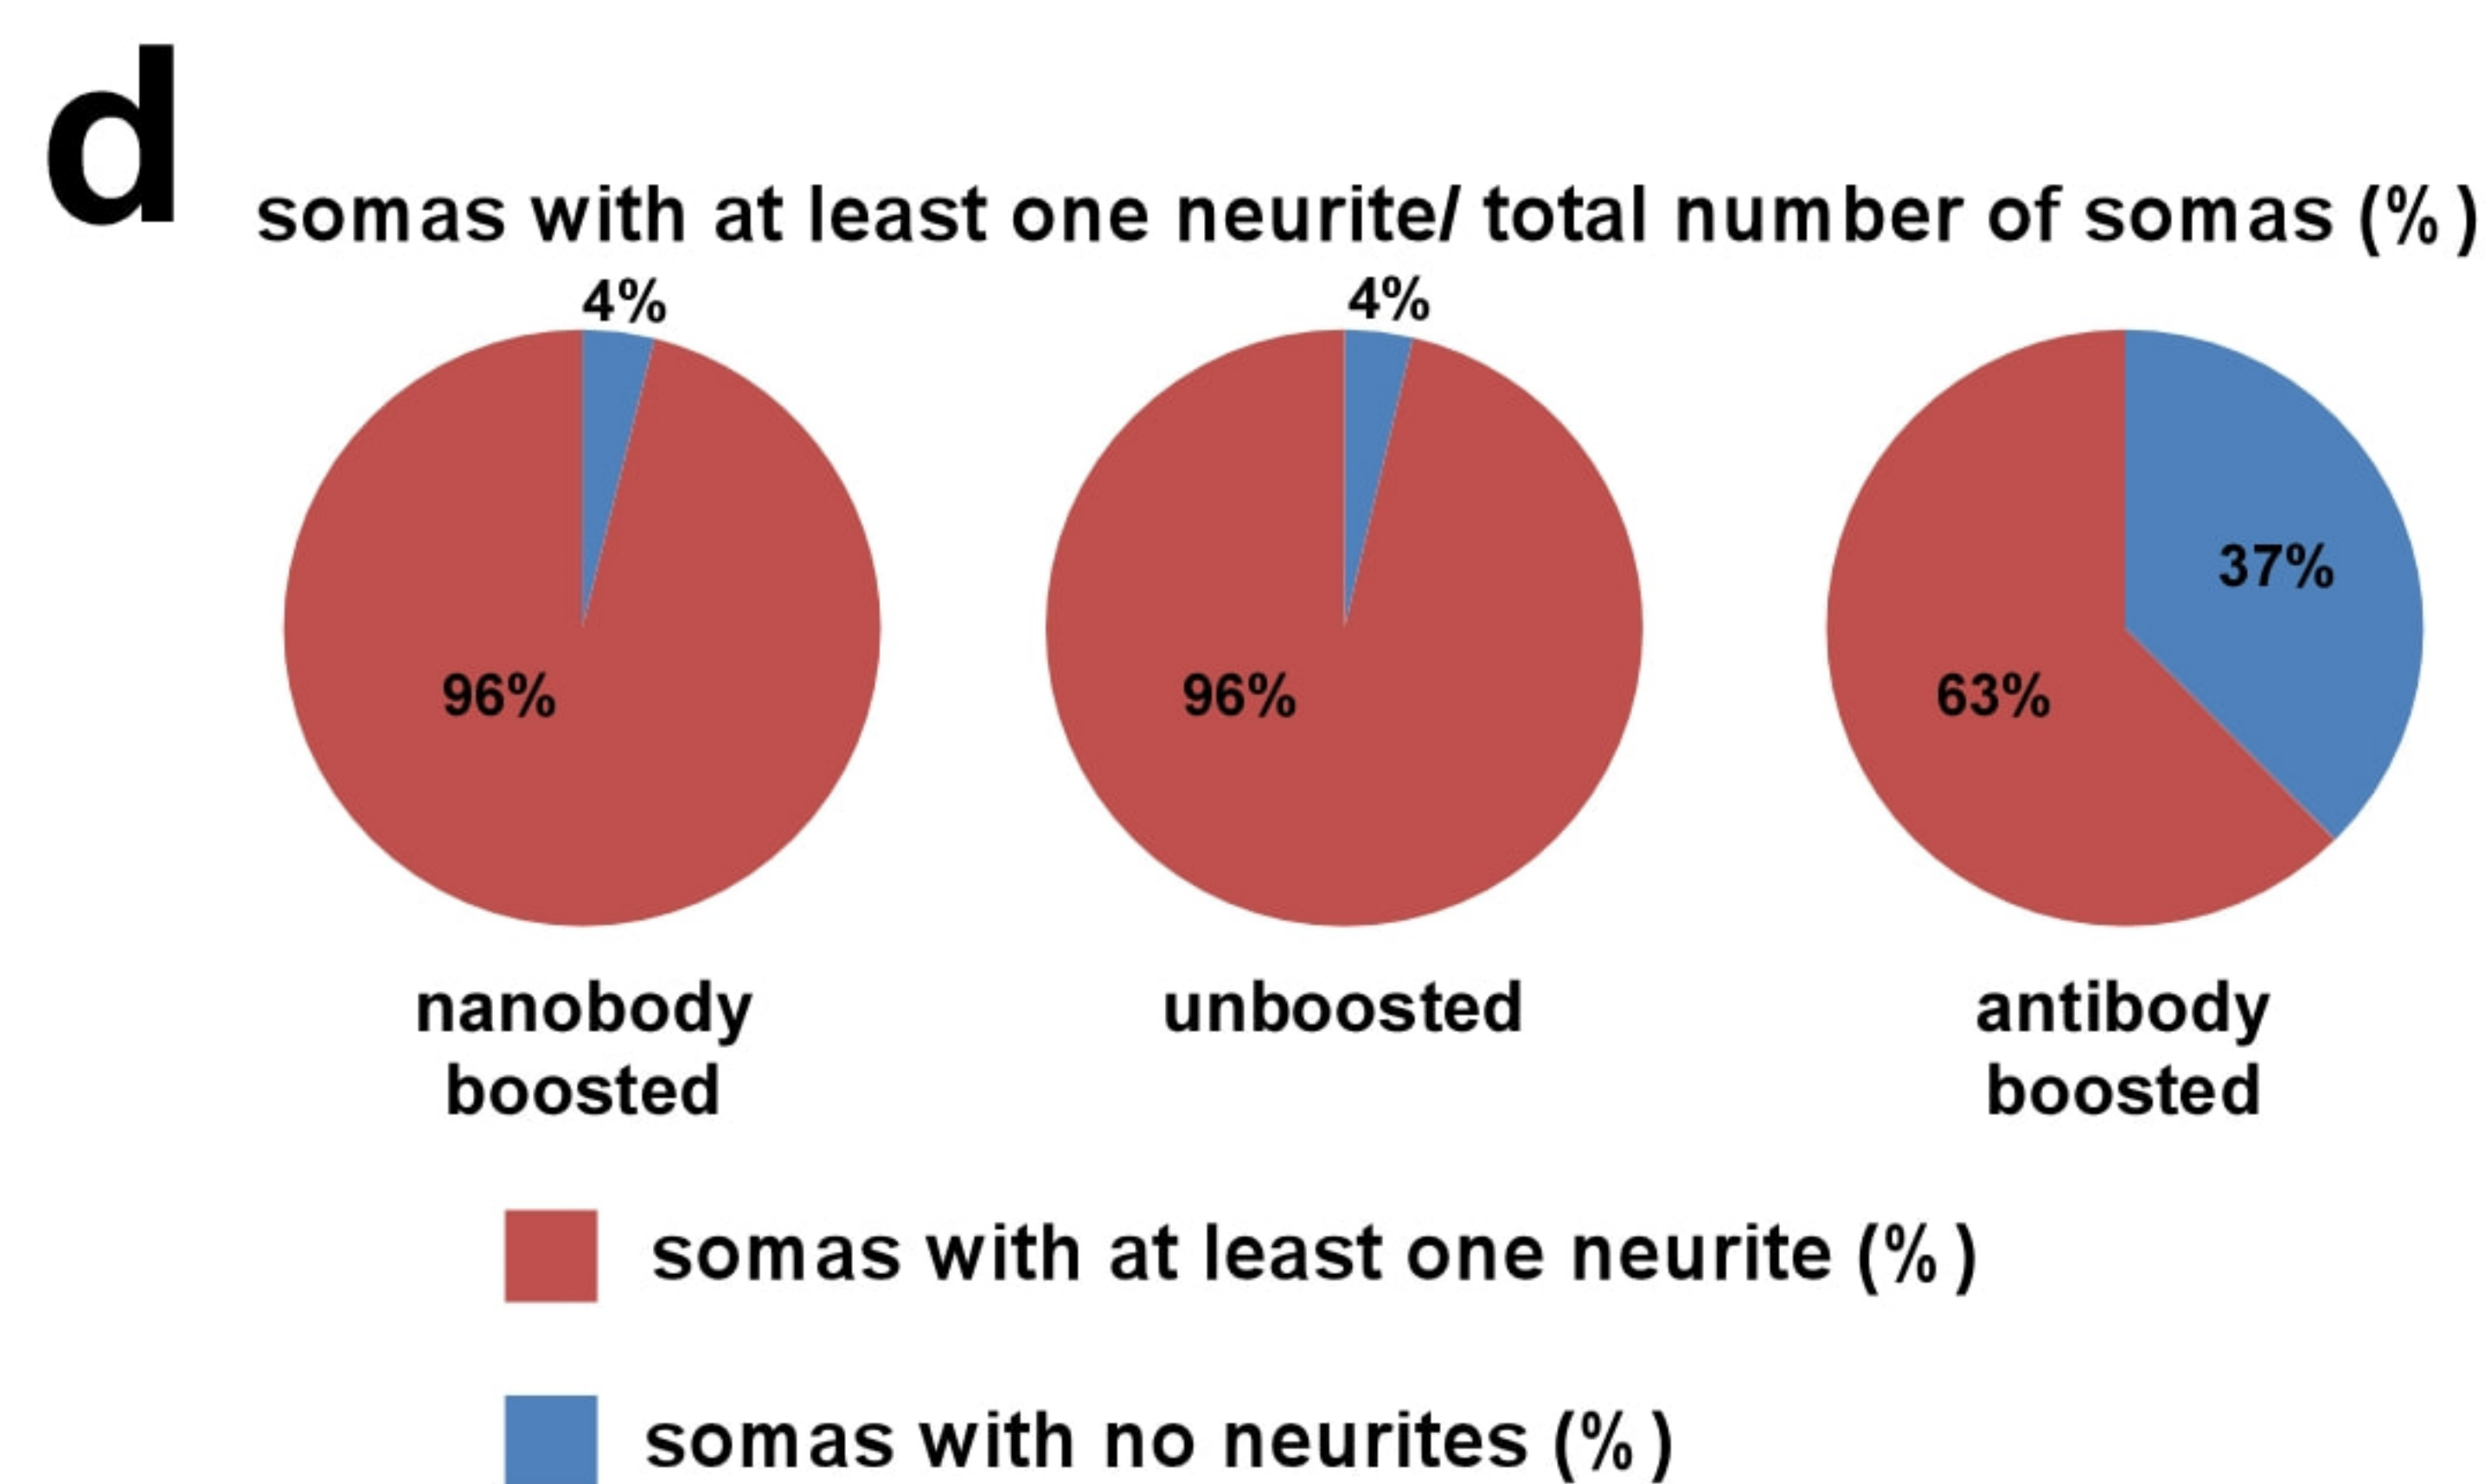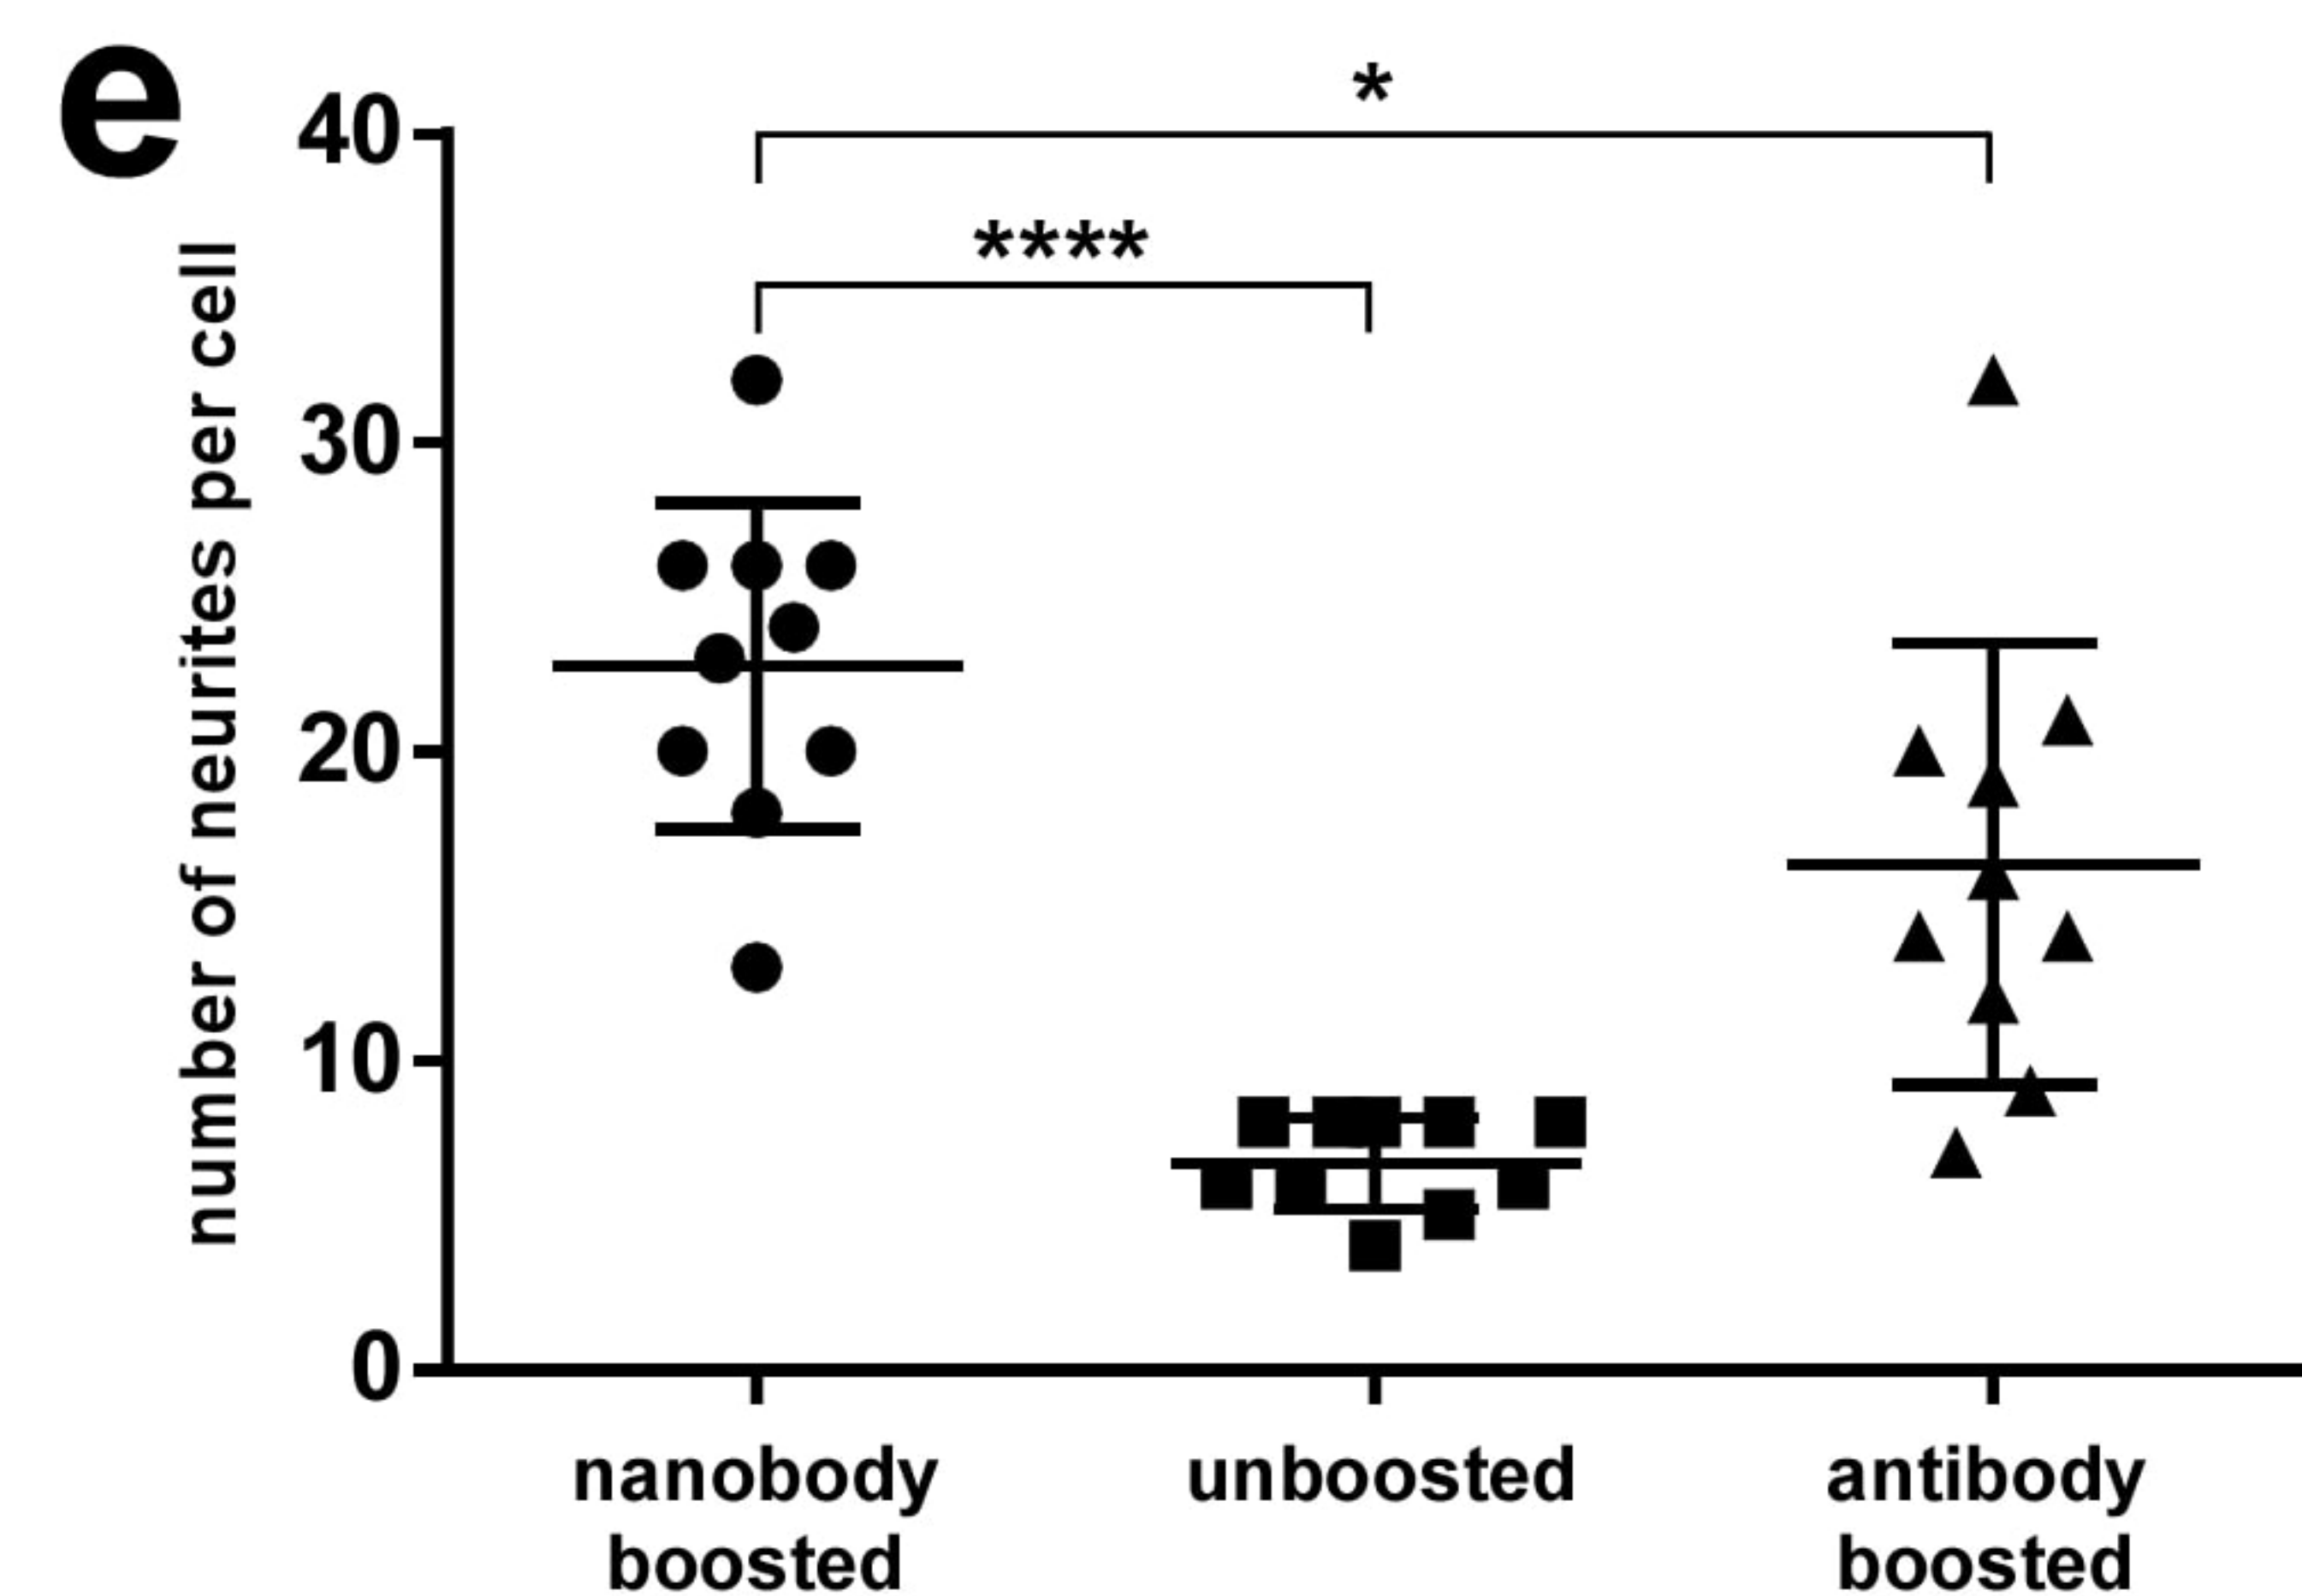

## Supplementary Figure 4

### Neuron tracing with NeuroGPS-Tree

(a-c) Tracing of neurons in vDISCO nanobody boosted (a), unboosted (b) and iDISCO+ conventional anti-GFP antibody boosted (c) brains from 6-13 weeks old *Thy1-GFPM* mice using NeuroGPS-Tree algorithms. The scans were obtained with a commercial light-sheet microscope (Ultramicroscope II, LaVision Biotec), optimized for large cleared tissue imaging, thereby with lower resolution compared to standard confocal microscopes. From left to right: raw image, equalized & filtered images, and NeuroGPS-Tree traced neuronal structures are shown: all the neurites belonging to a neuron are represented by the same color. Neuronal soma identified by NeuroGPS-Tree are represented by red dots. Single experiment per each method. (d) Quantification of number of detected neurons characterized by their soma with at least one detected neurite over the total number of detected somas in vDISCO boosted vs unboosted and conventional antibody boosted samples. While in vDISCO boosted and unboosted cases almost all the neurons were detected with at least one neurite per soma, in the antibody boosted case only 63% was detected with neurites (e) Quantification of number of detected neurites per neuron in vDISCO boosted vs. unboosted and conventional antibody boosted samples, showing that only vDISCO allows the tracing of more neurites per cell (mean  $\pm$  s.d;  $n=10$  neurons per group; statistical significance ( $F_{2,27}=24.30$ , \*\*\*\* $p < 0.0001$ , \* $p = 0.02$ ) was assessed by one-way ANOVA followed by Dunnett's *post hoc* test).



**raw data**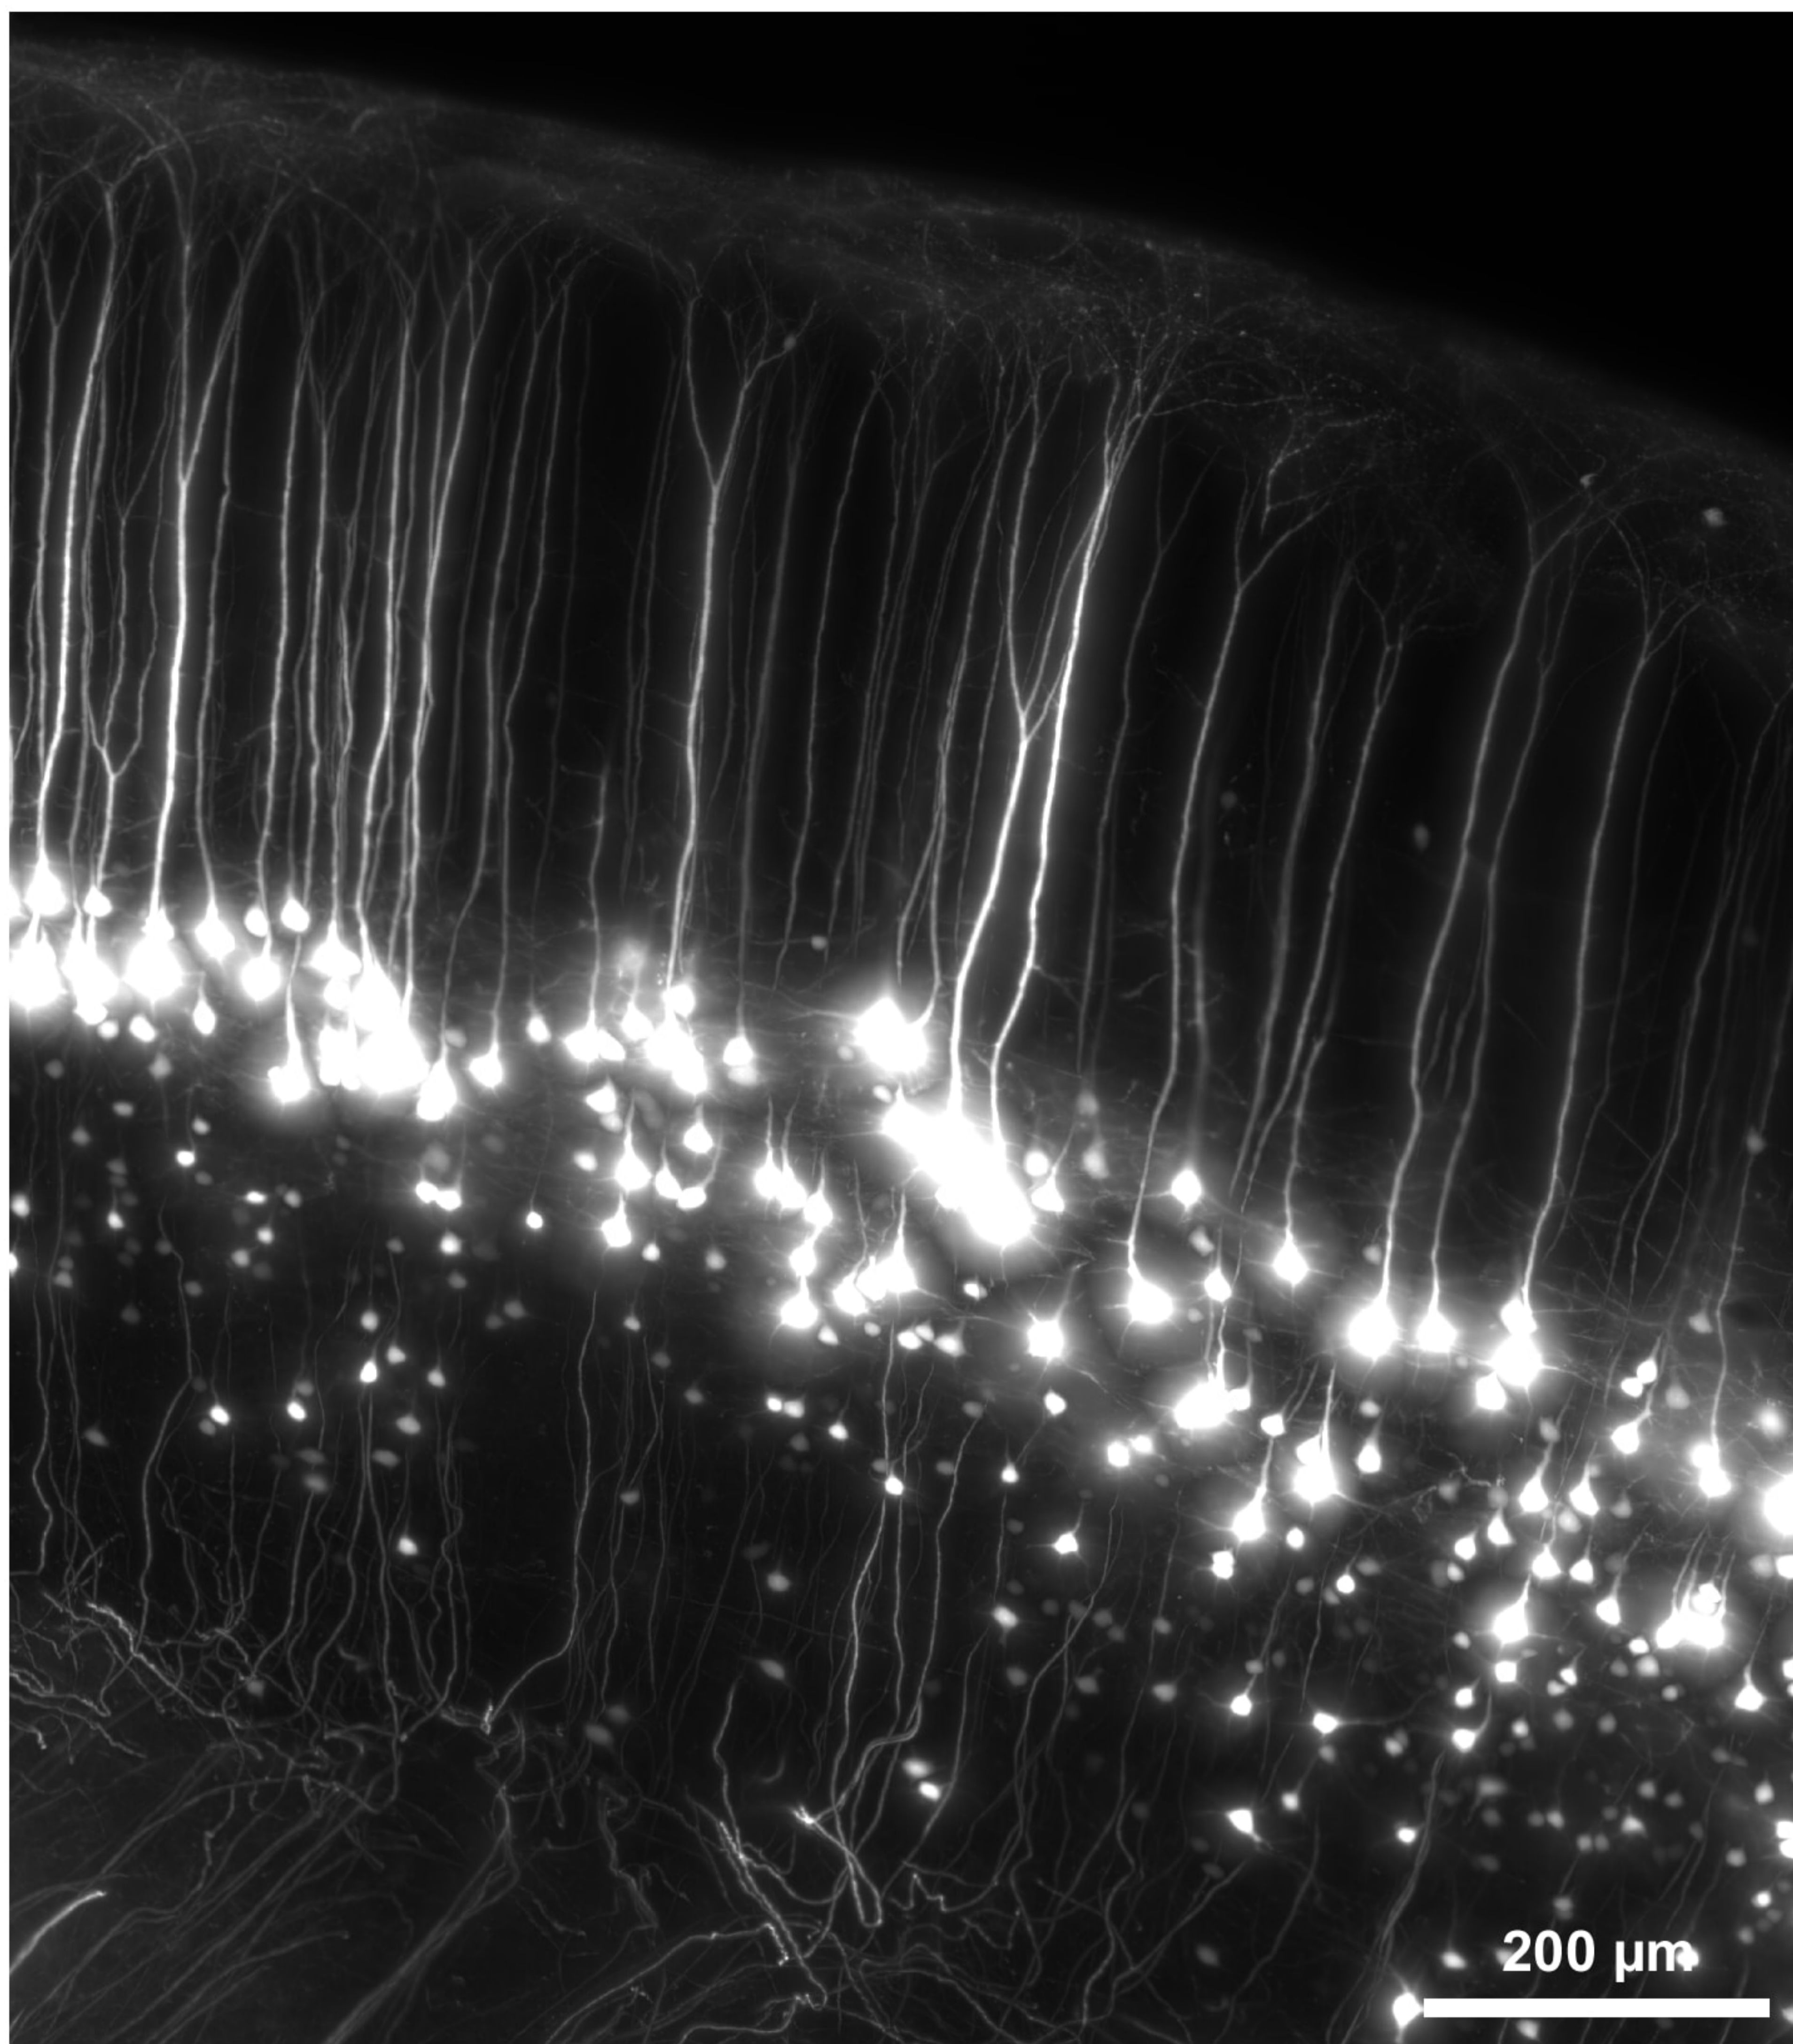**filtered data**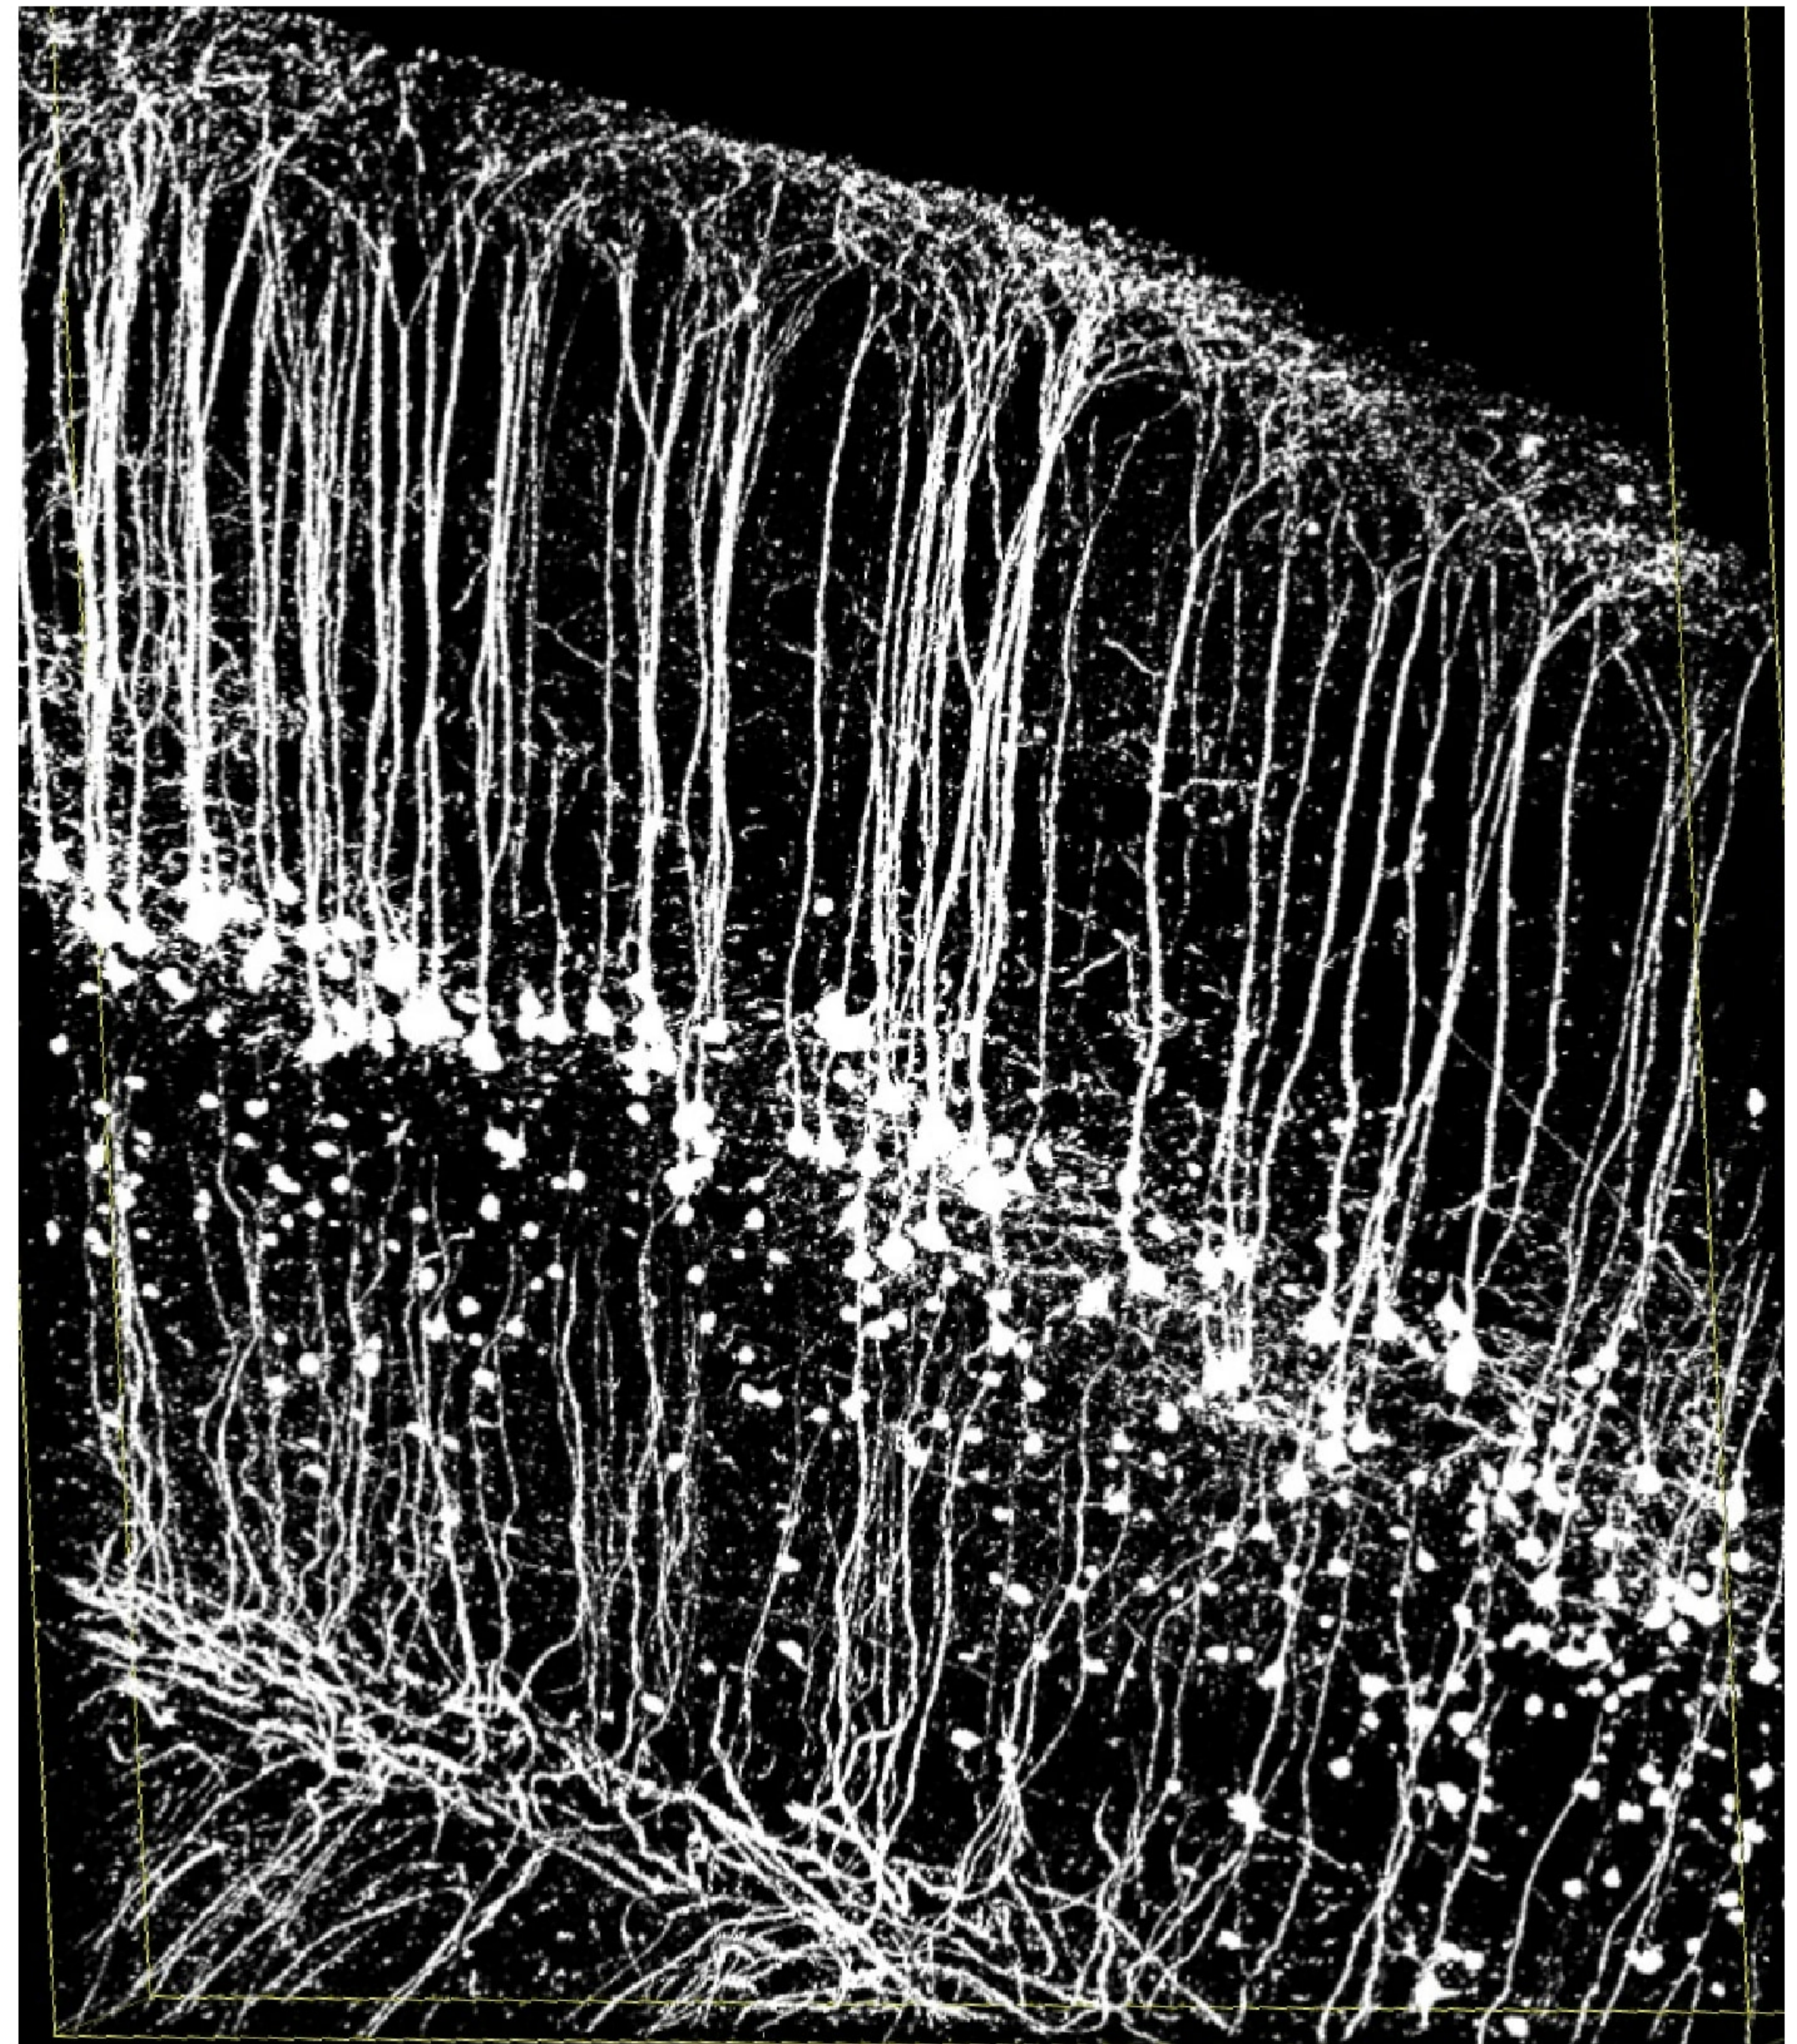**NeuroGPS-Tree traced**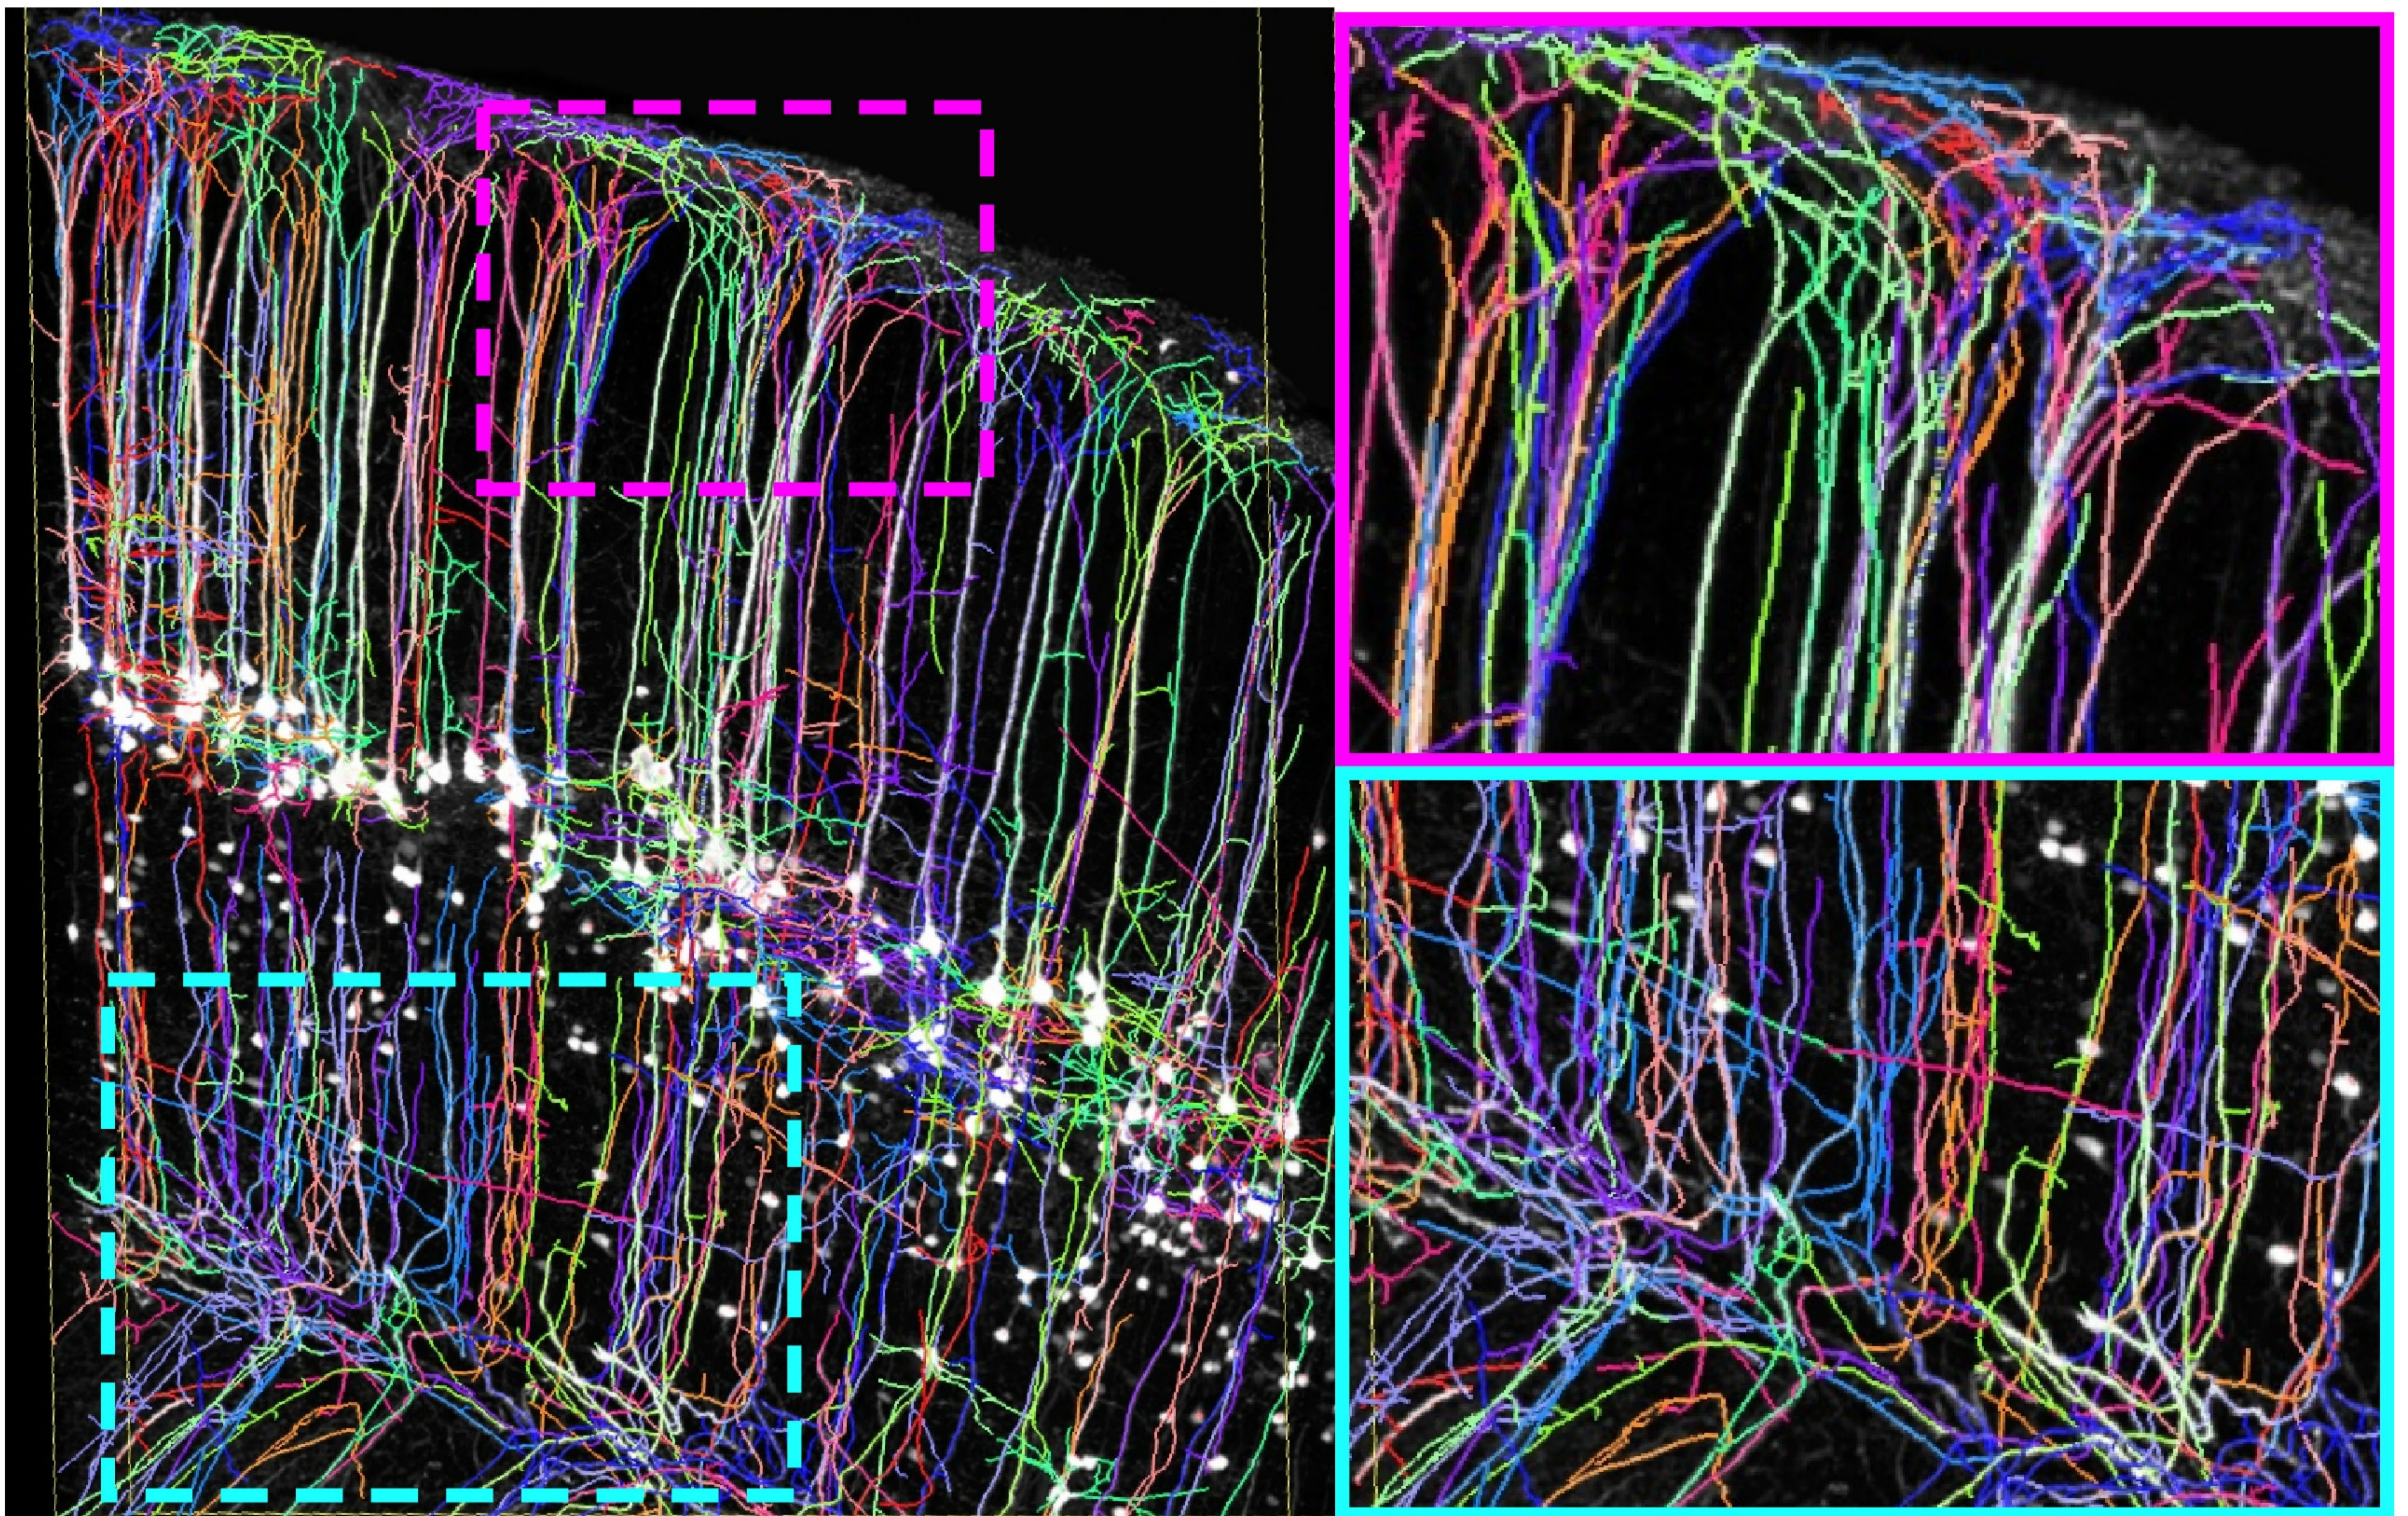

## Supplementary Figure 5

### Neuron tracing with NeuroGPS-Tree, secondary somatosensory cortex

Tracing of neurons in vDISCO boosted brain from a 6 weeks old *Thy1-GFP* mouse using NeuroGPS-Tree algorithms. The displayed region is around the secondary somatosensory cortex (Region S2 of the Figure 152 of the Franklin & Paxinos atlas, Bregma -2.80, Interaural 3.00). The scans were obtained with a commercial light-sheet microscope (Ultramicroscope II, LaVision Biotec), optimized for large cleared tissue imaging, thereby with lower resolution compared to standard confocal microscopes. From left, right to down: raw image, equalized & filtered images, and NeuroGPS-Tree traced neuronal structures are shown: all the neurites belonging to a neuron are represented by the same color. Axons projecting out from the somas to the corpus callosum are visible and traced. Single experiment.



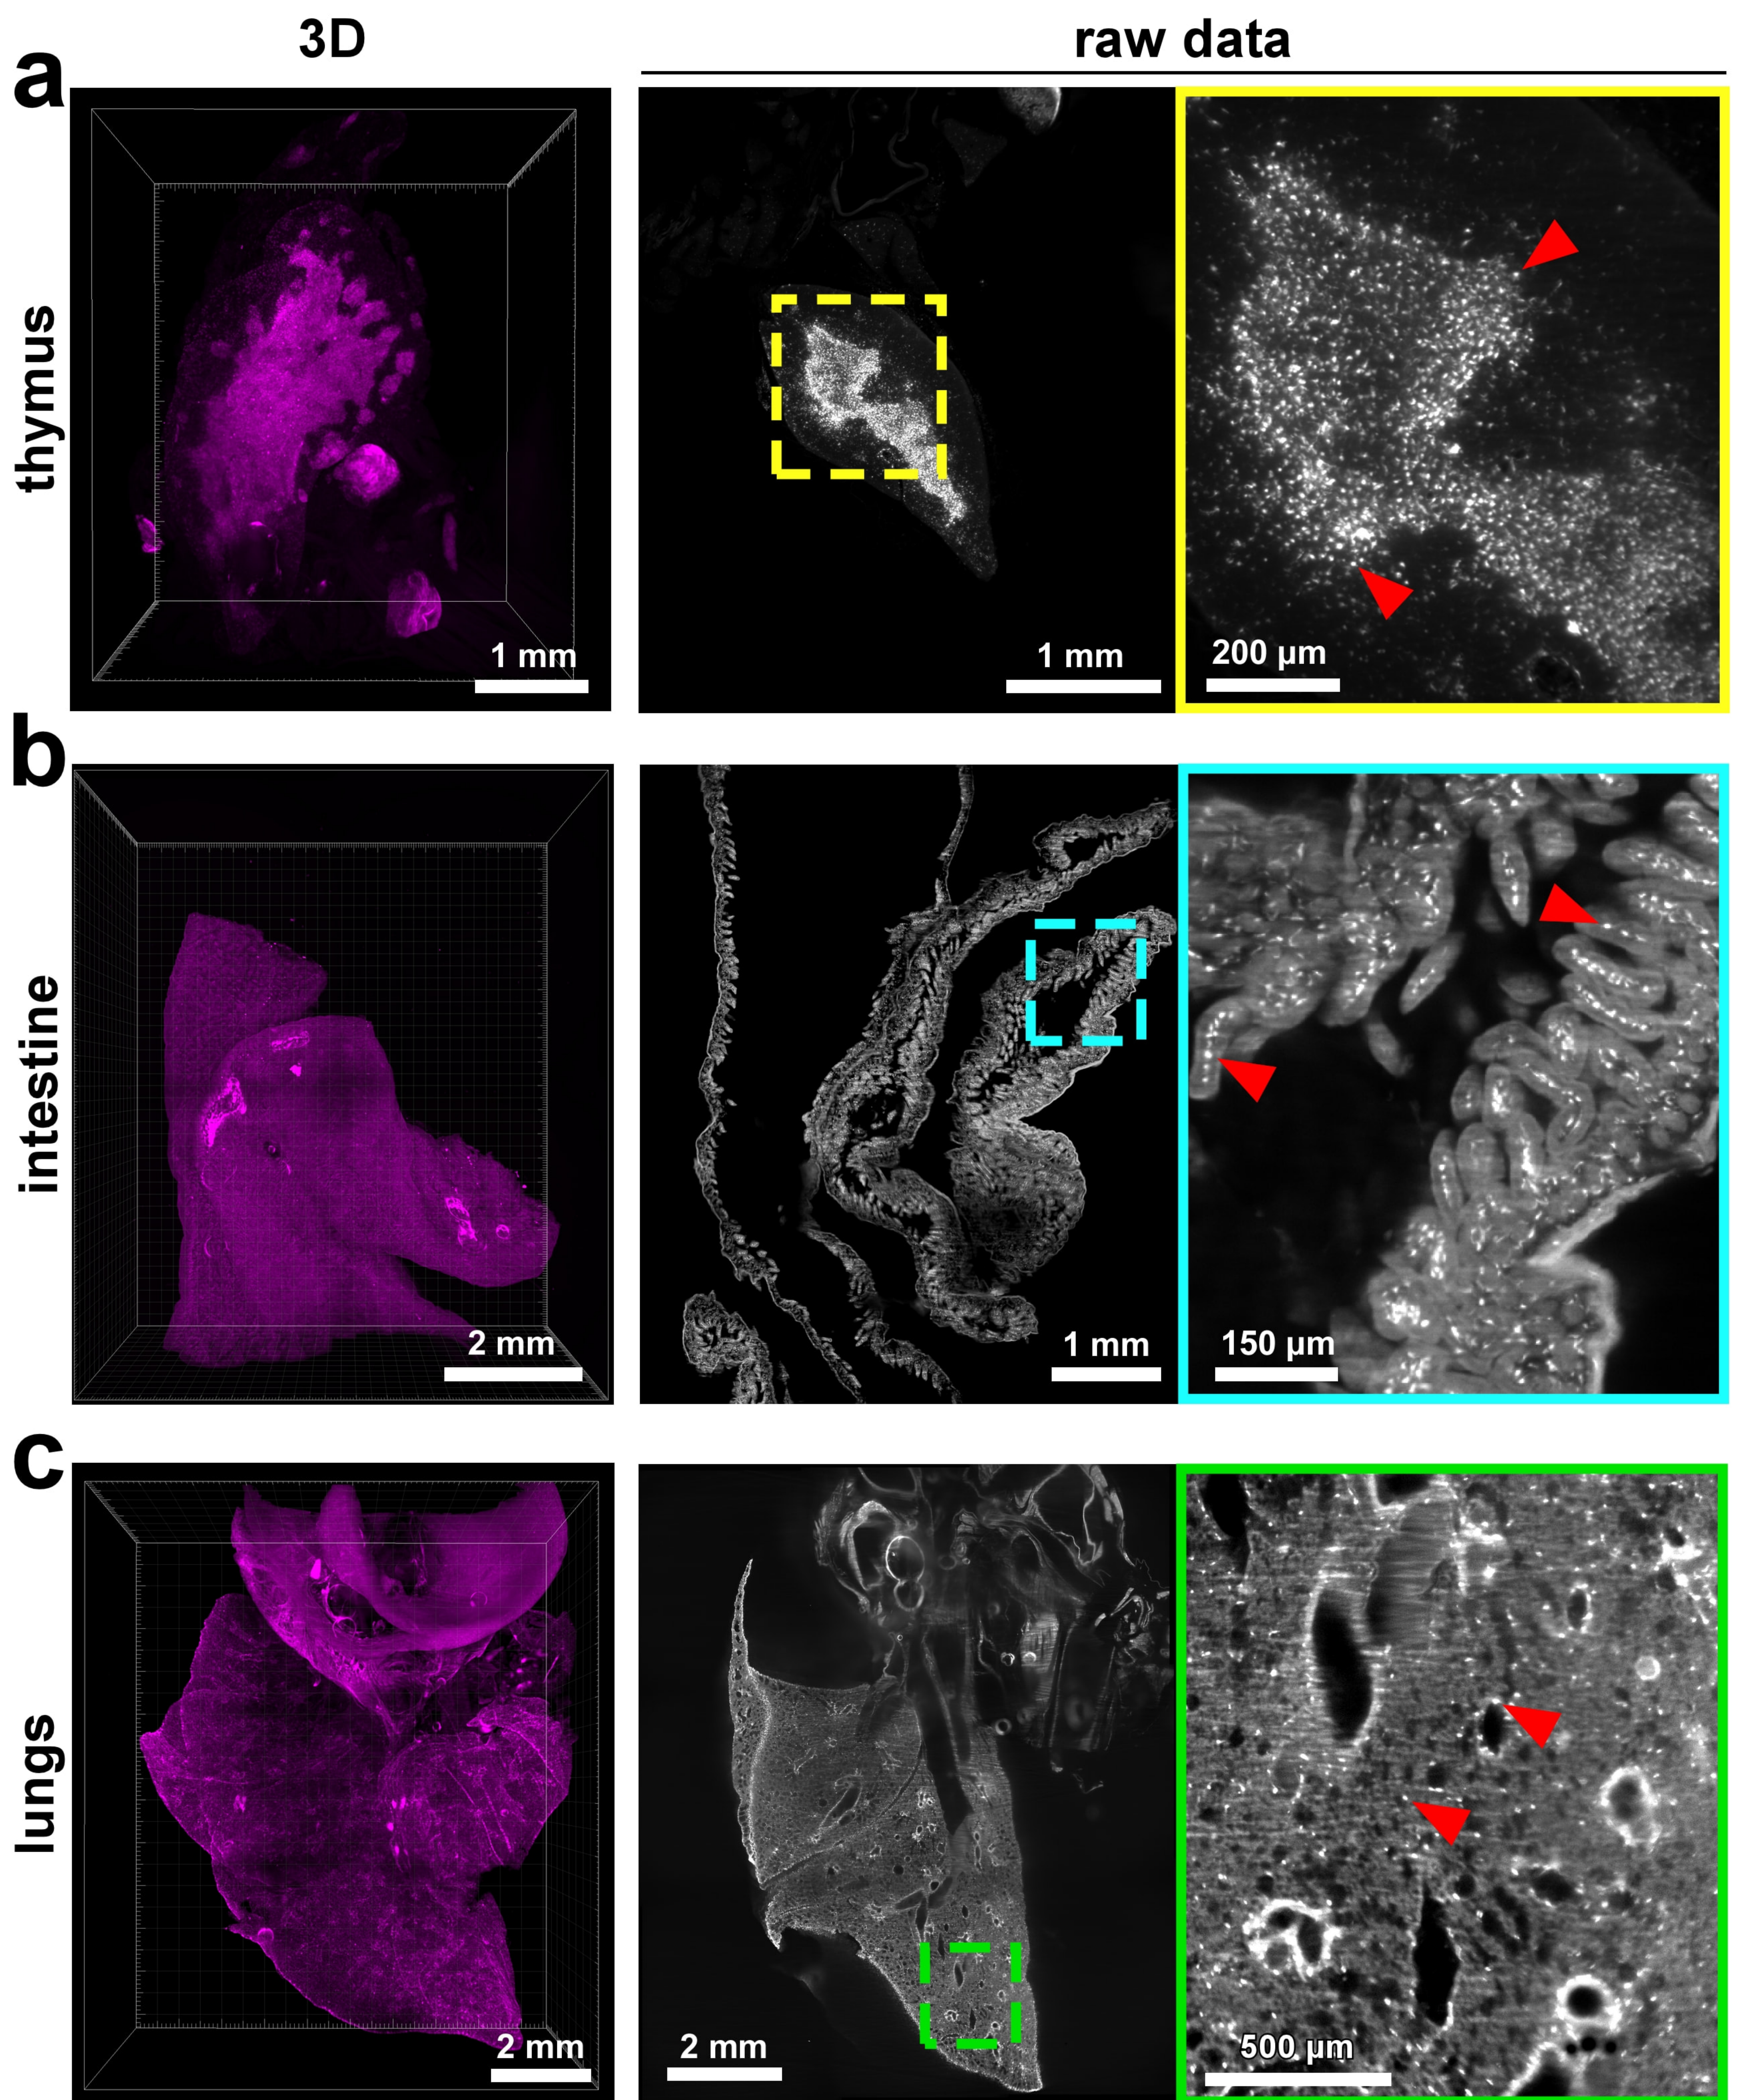

## Supplementary Figure 6

### Visualization of CX3CR1 GFP<sup>+</sup> cells in individual organs

(a-c) 3D visualization (magenta) and raw data images (grey) of individual organs including thymus (a), intestine (b), and lungs (c) from a 6 months old CX3CR1<sup>GFP/+</sup> mouse imaged by light-sheet microscopy. Individual CX3CR1 GFP<sup>+</sup> cells are indicated by red arrow-heads in the zoomed images from the boxed regions. Similar results were observed in 3 independent animals.



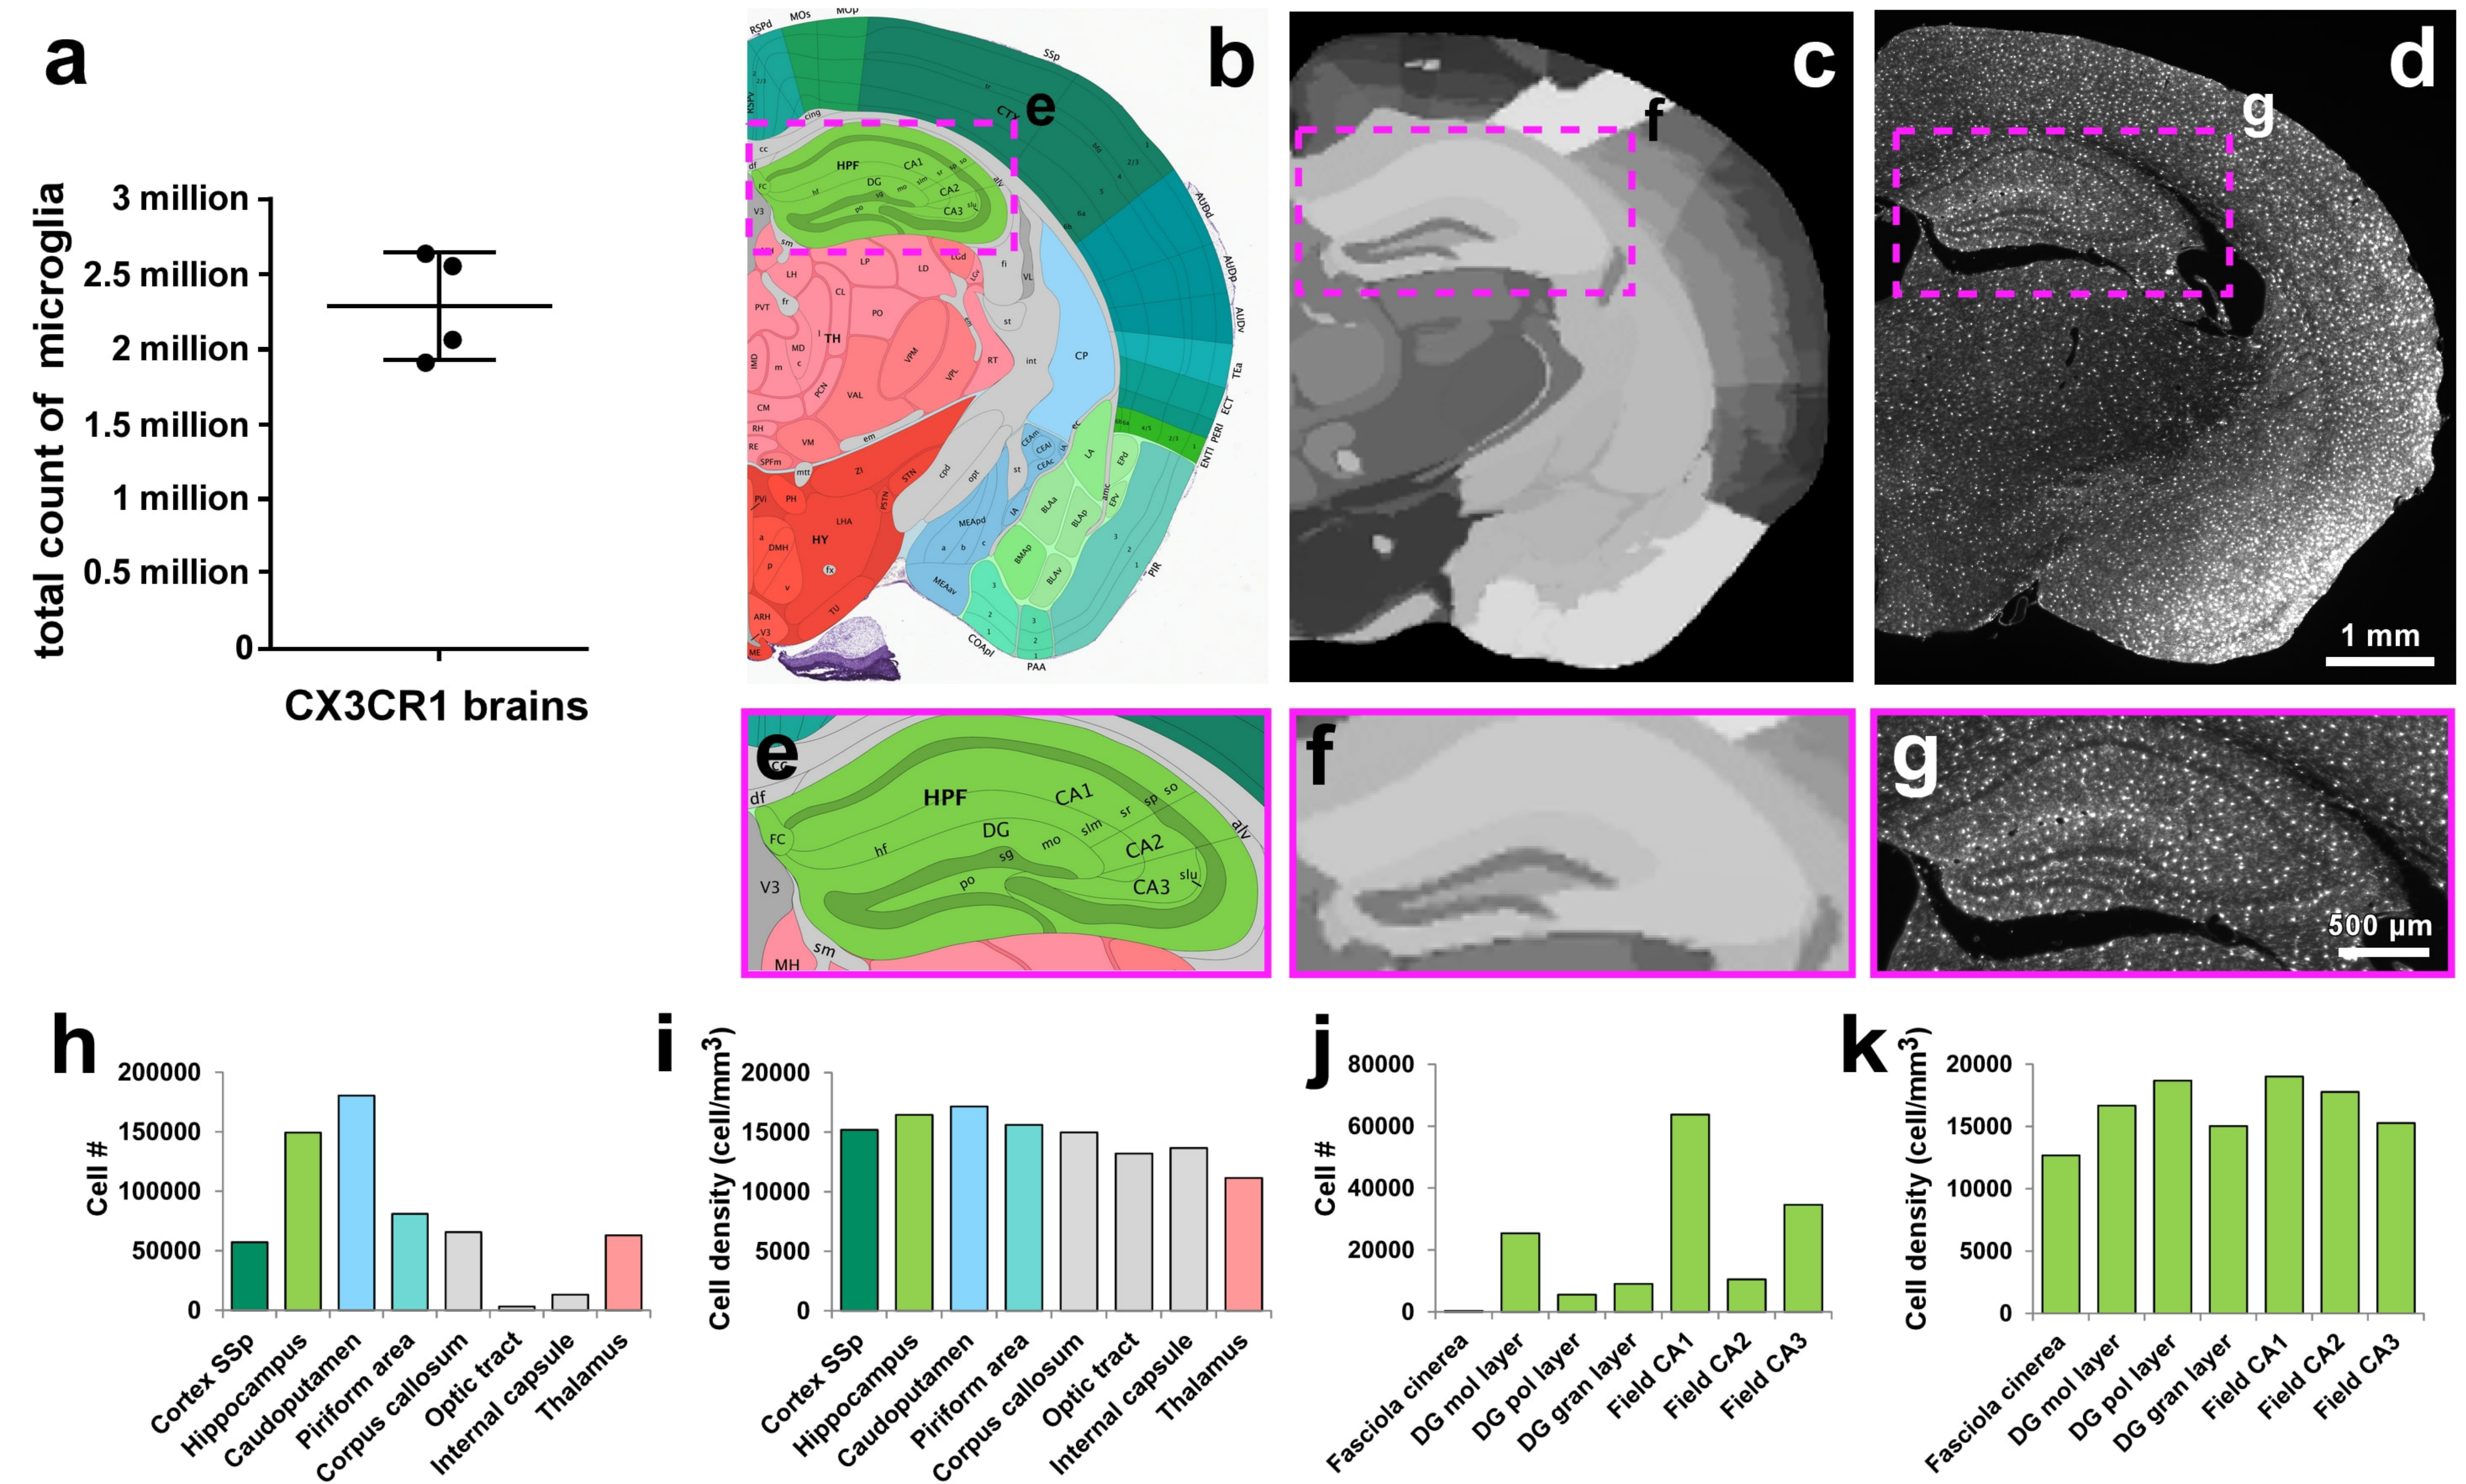

## Supplementary Figure 7

### Visualization and quantification of the signal from CX3CR1<sup>GFP/+</sup> mouse by vDISCO boosting

(a-k) Automated analysis of fluorescent cells quantification and distribution in CX3CR1<sup>GFP/+</sup> mouse brain after vDISCO boosting (mean  $\pm$  s.d.; n = 4 2-5 months old mice: 2.647, 2.553, 1.909, 2.061 millions respectively (a)): (b) reference image from the Allen brain atlas, (c) registered reference annotation image, (d) the corresponding region in raw data in coronal view. (e-g) High magnification images of the region indicated in b-d containing the hippocampus. Automated quantification of absolute cell numbers (h) and cell densities (i) of the anatomical regions visible in b-d. Absolute cell numbers (j) and cell densities (k) of sub-regions of hippocampus shown in e-g. The quantifications include the cells in both brain hemispheres.



high pressure

low pressure

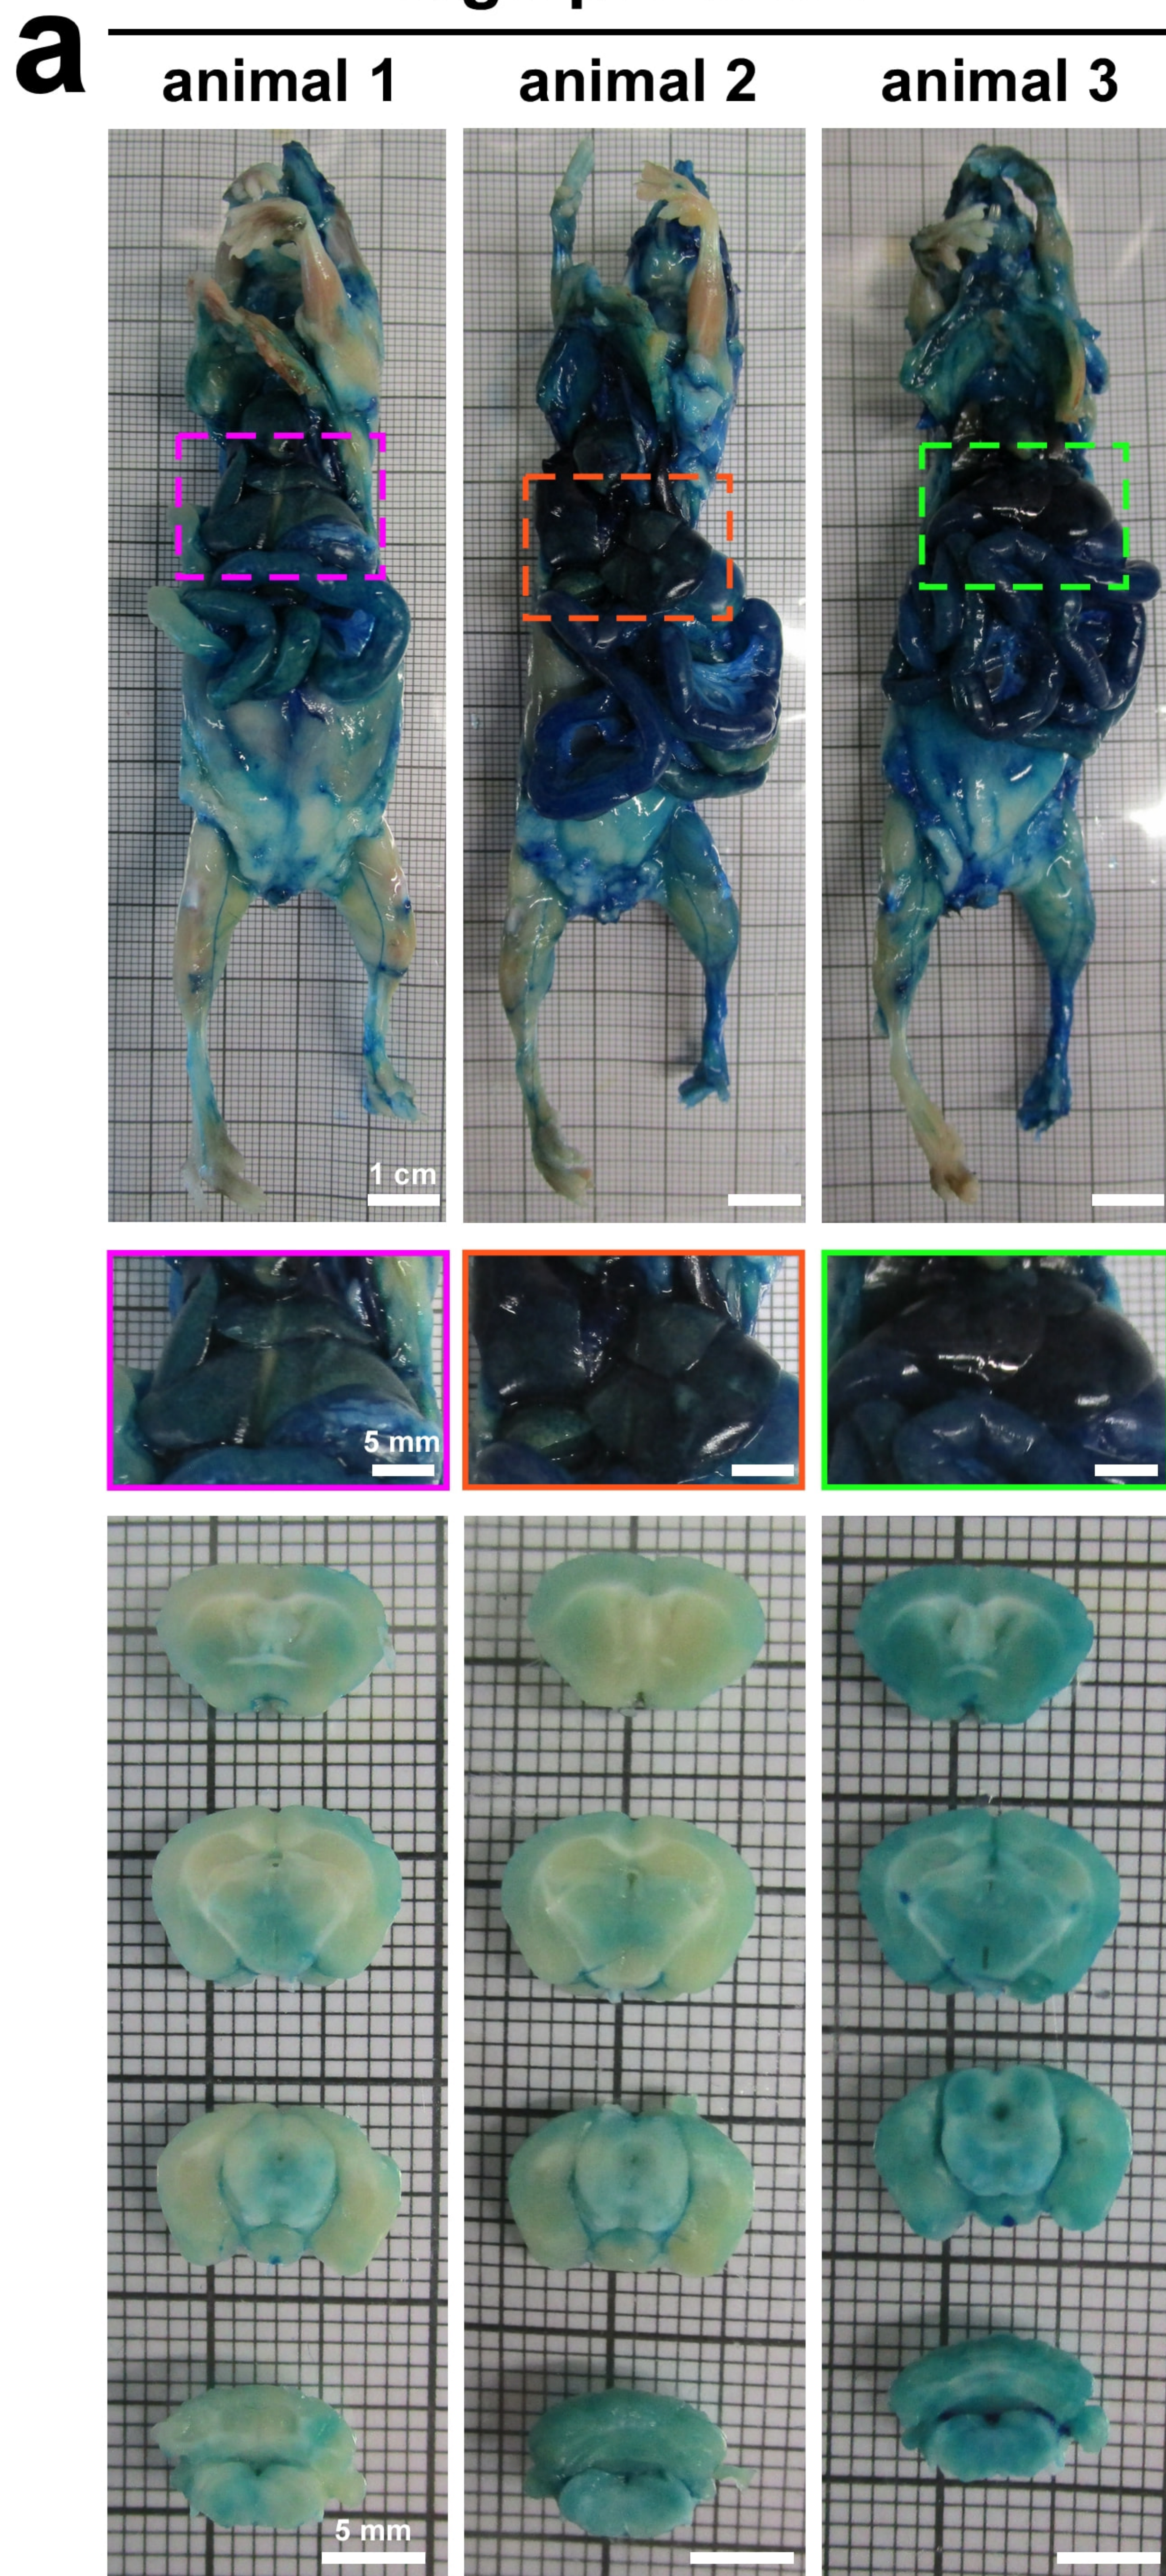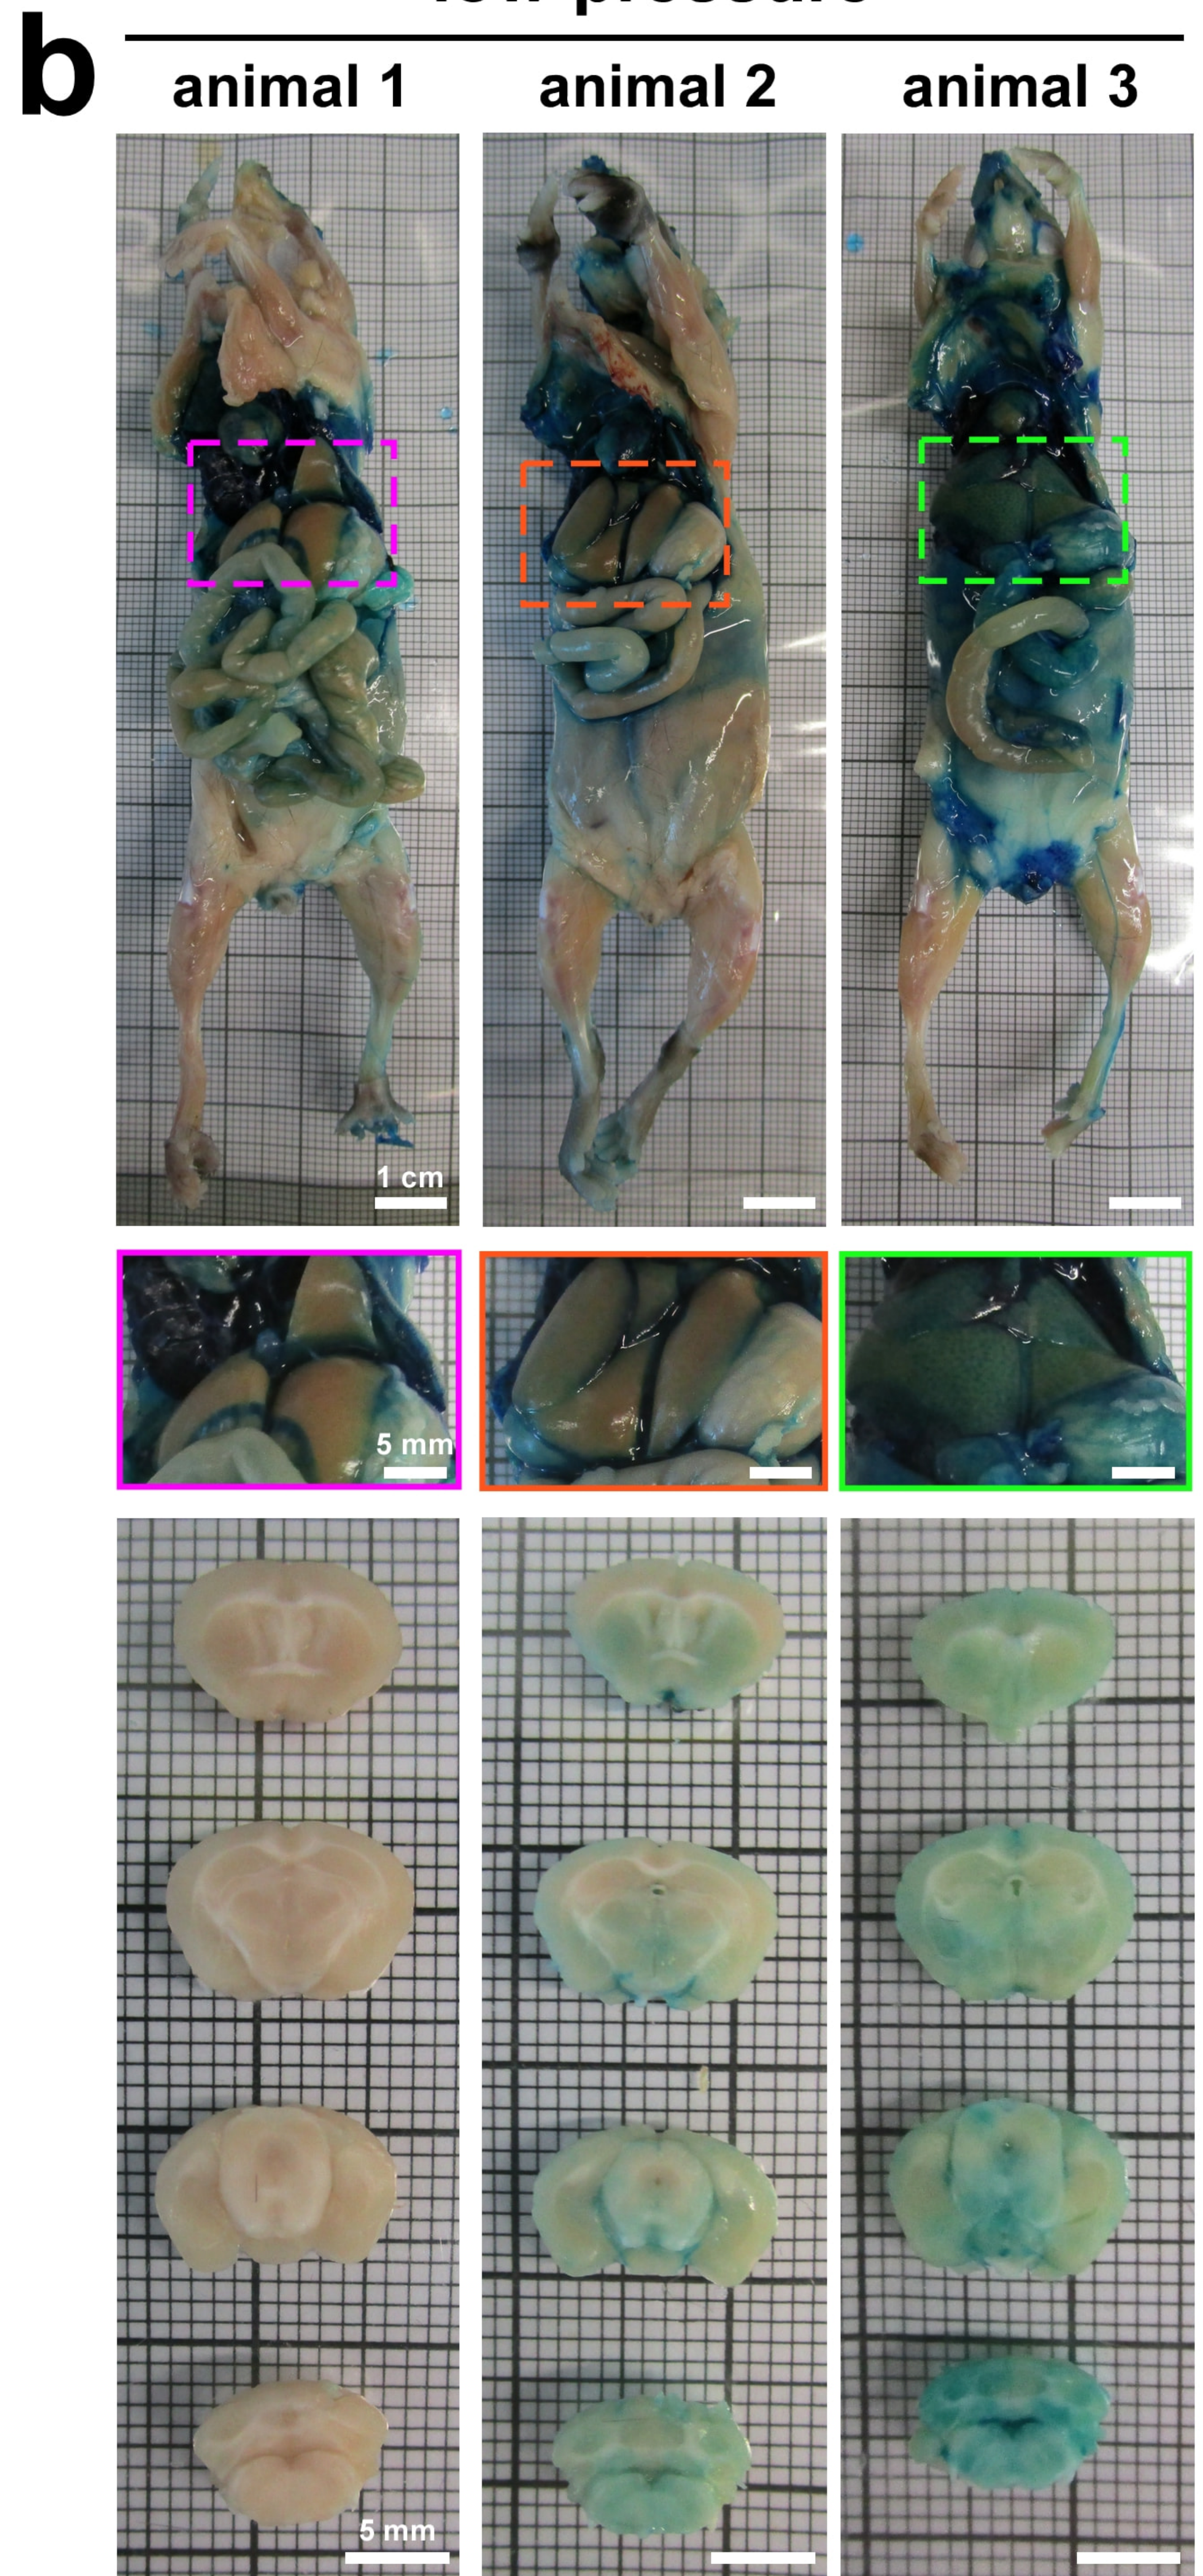

## Supplementary Figure 8

### Comparison between high vs low pressure transcardial perfusion

Diffusion of blue dye in the body (up) and brain (down) of 4 months old C57BL/6J animals transcardially perfused for 15 minutes with methylene blue with high pressure (approx. 180 mmHg) (a) vs low pressure (approx. 70 mmHg) (b). The colored rectangles (middle) show the high magnification images of the dashed regions at the level of the liver.



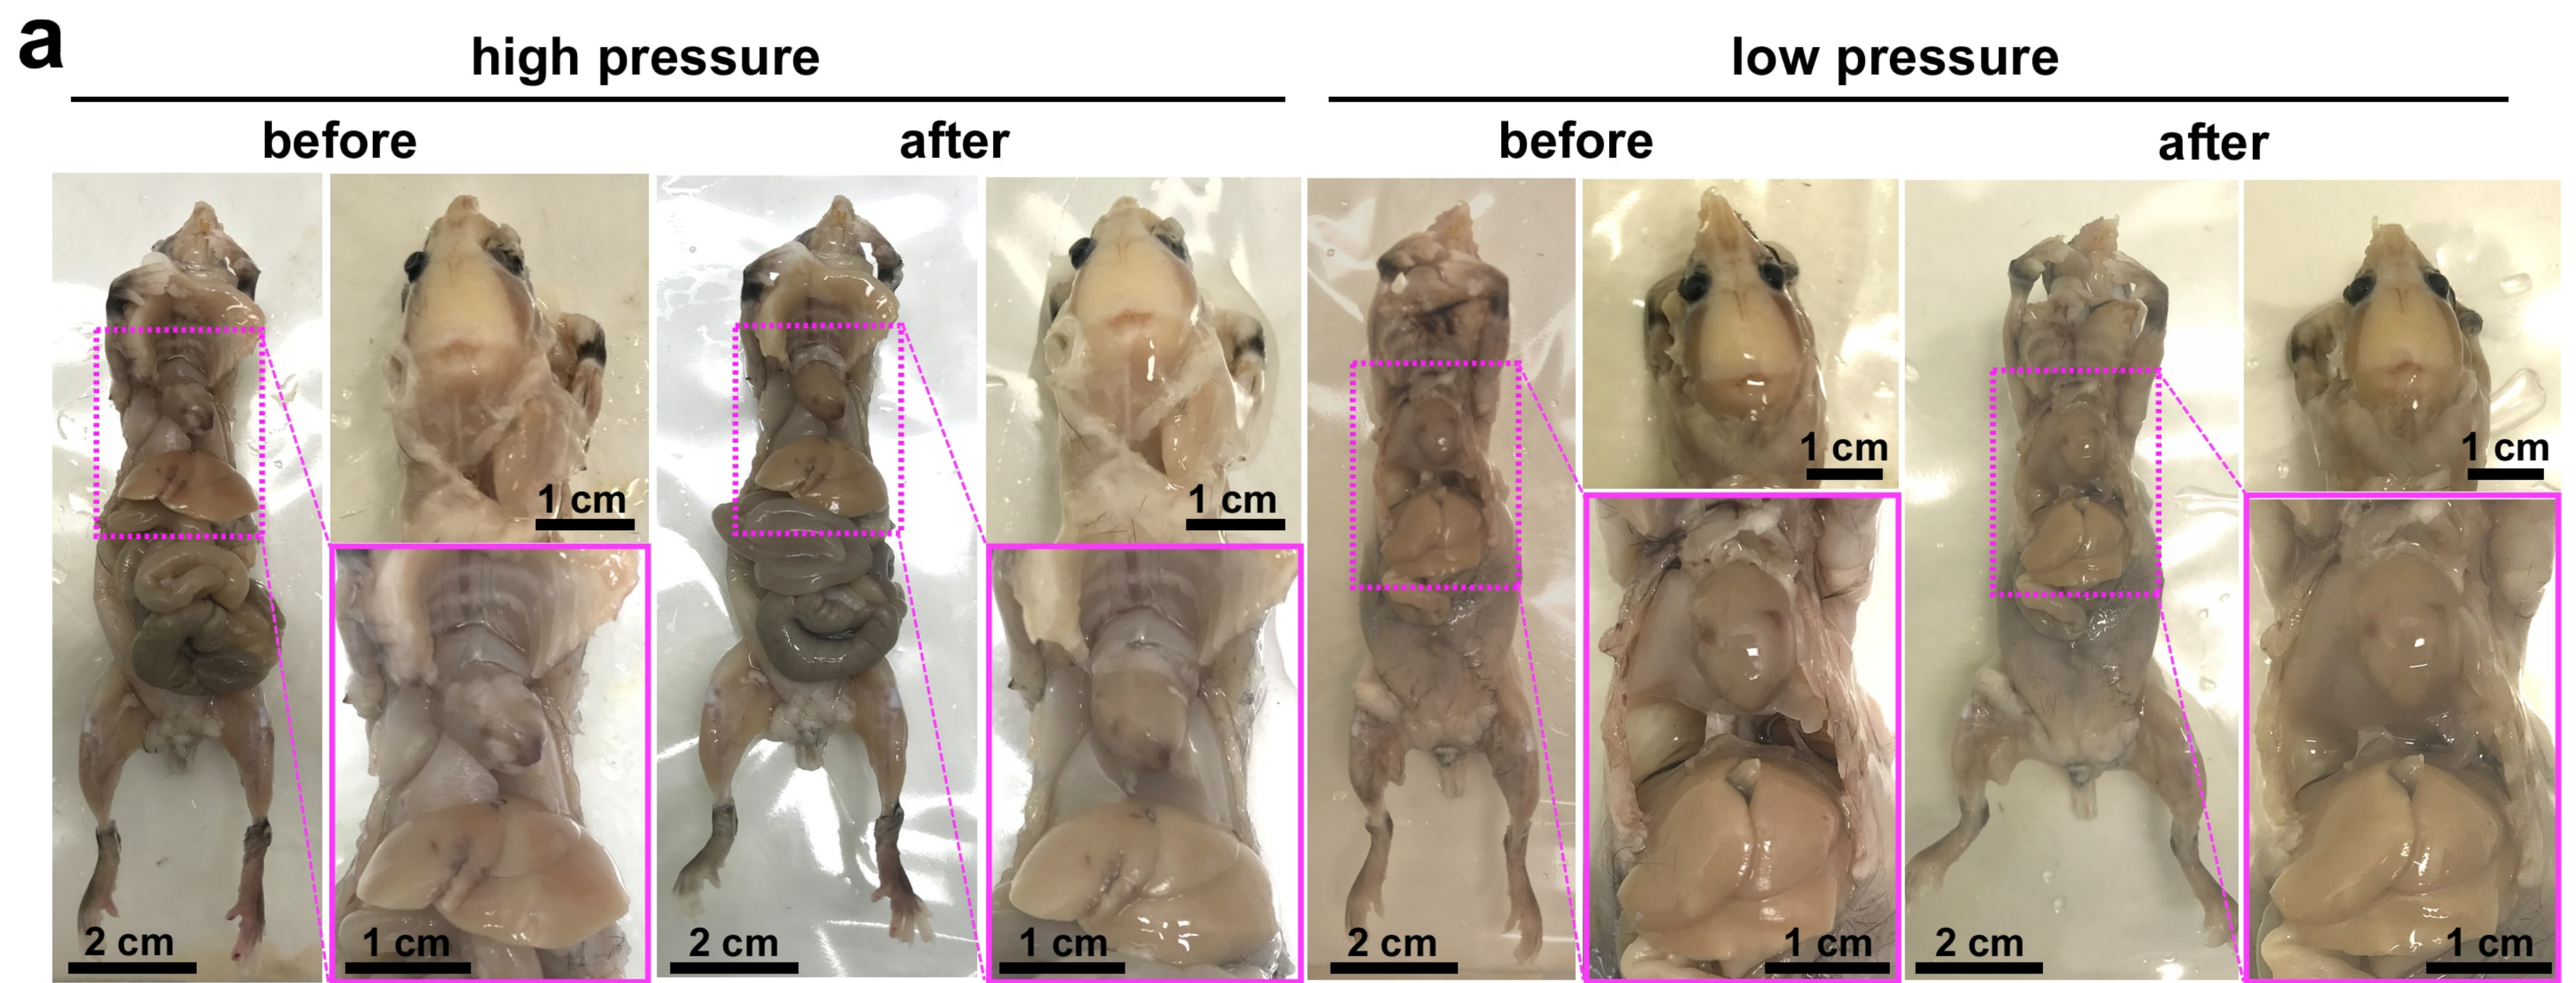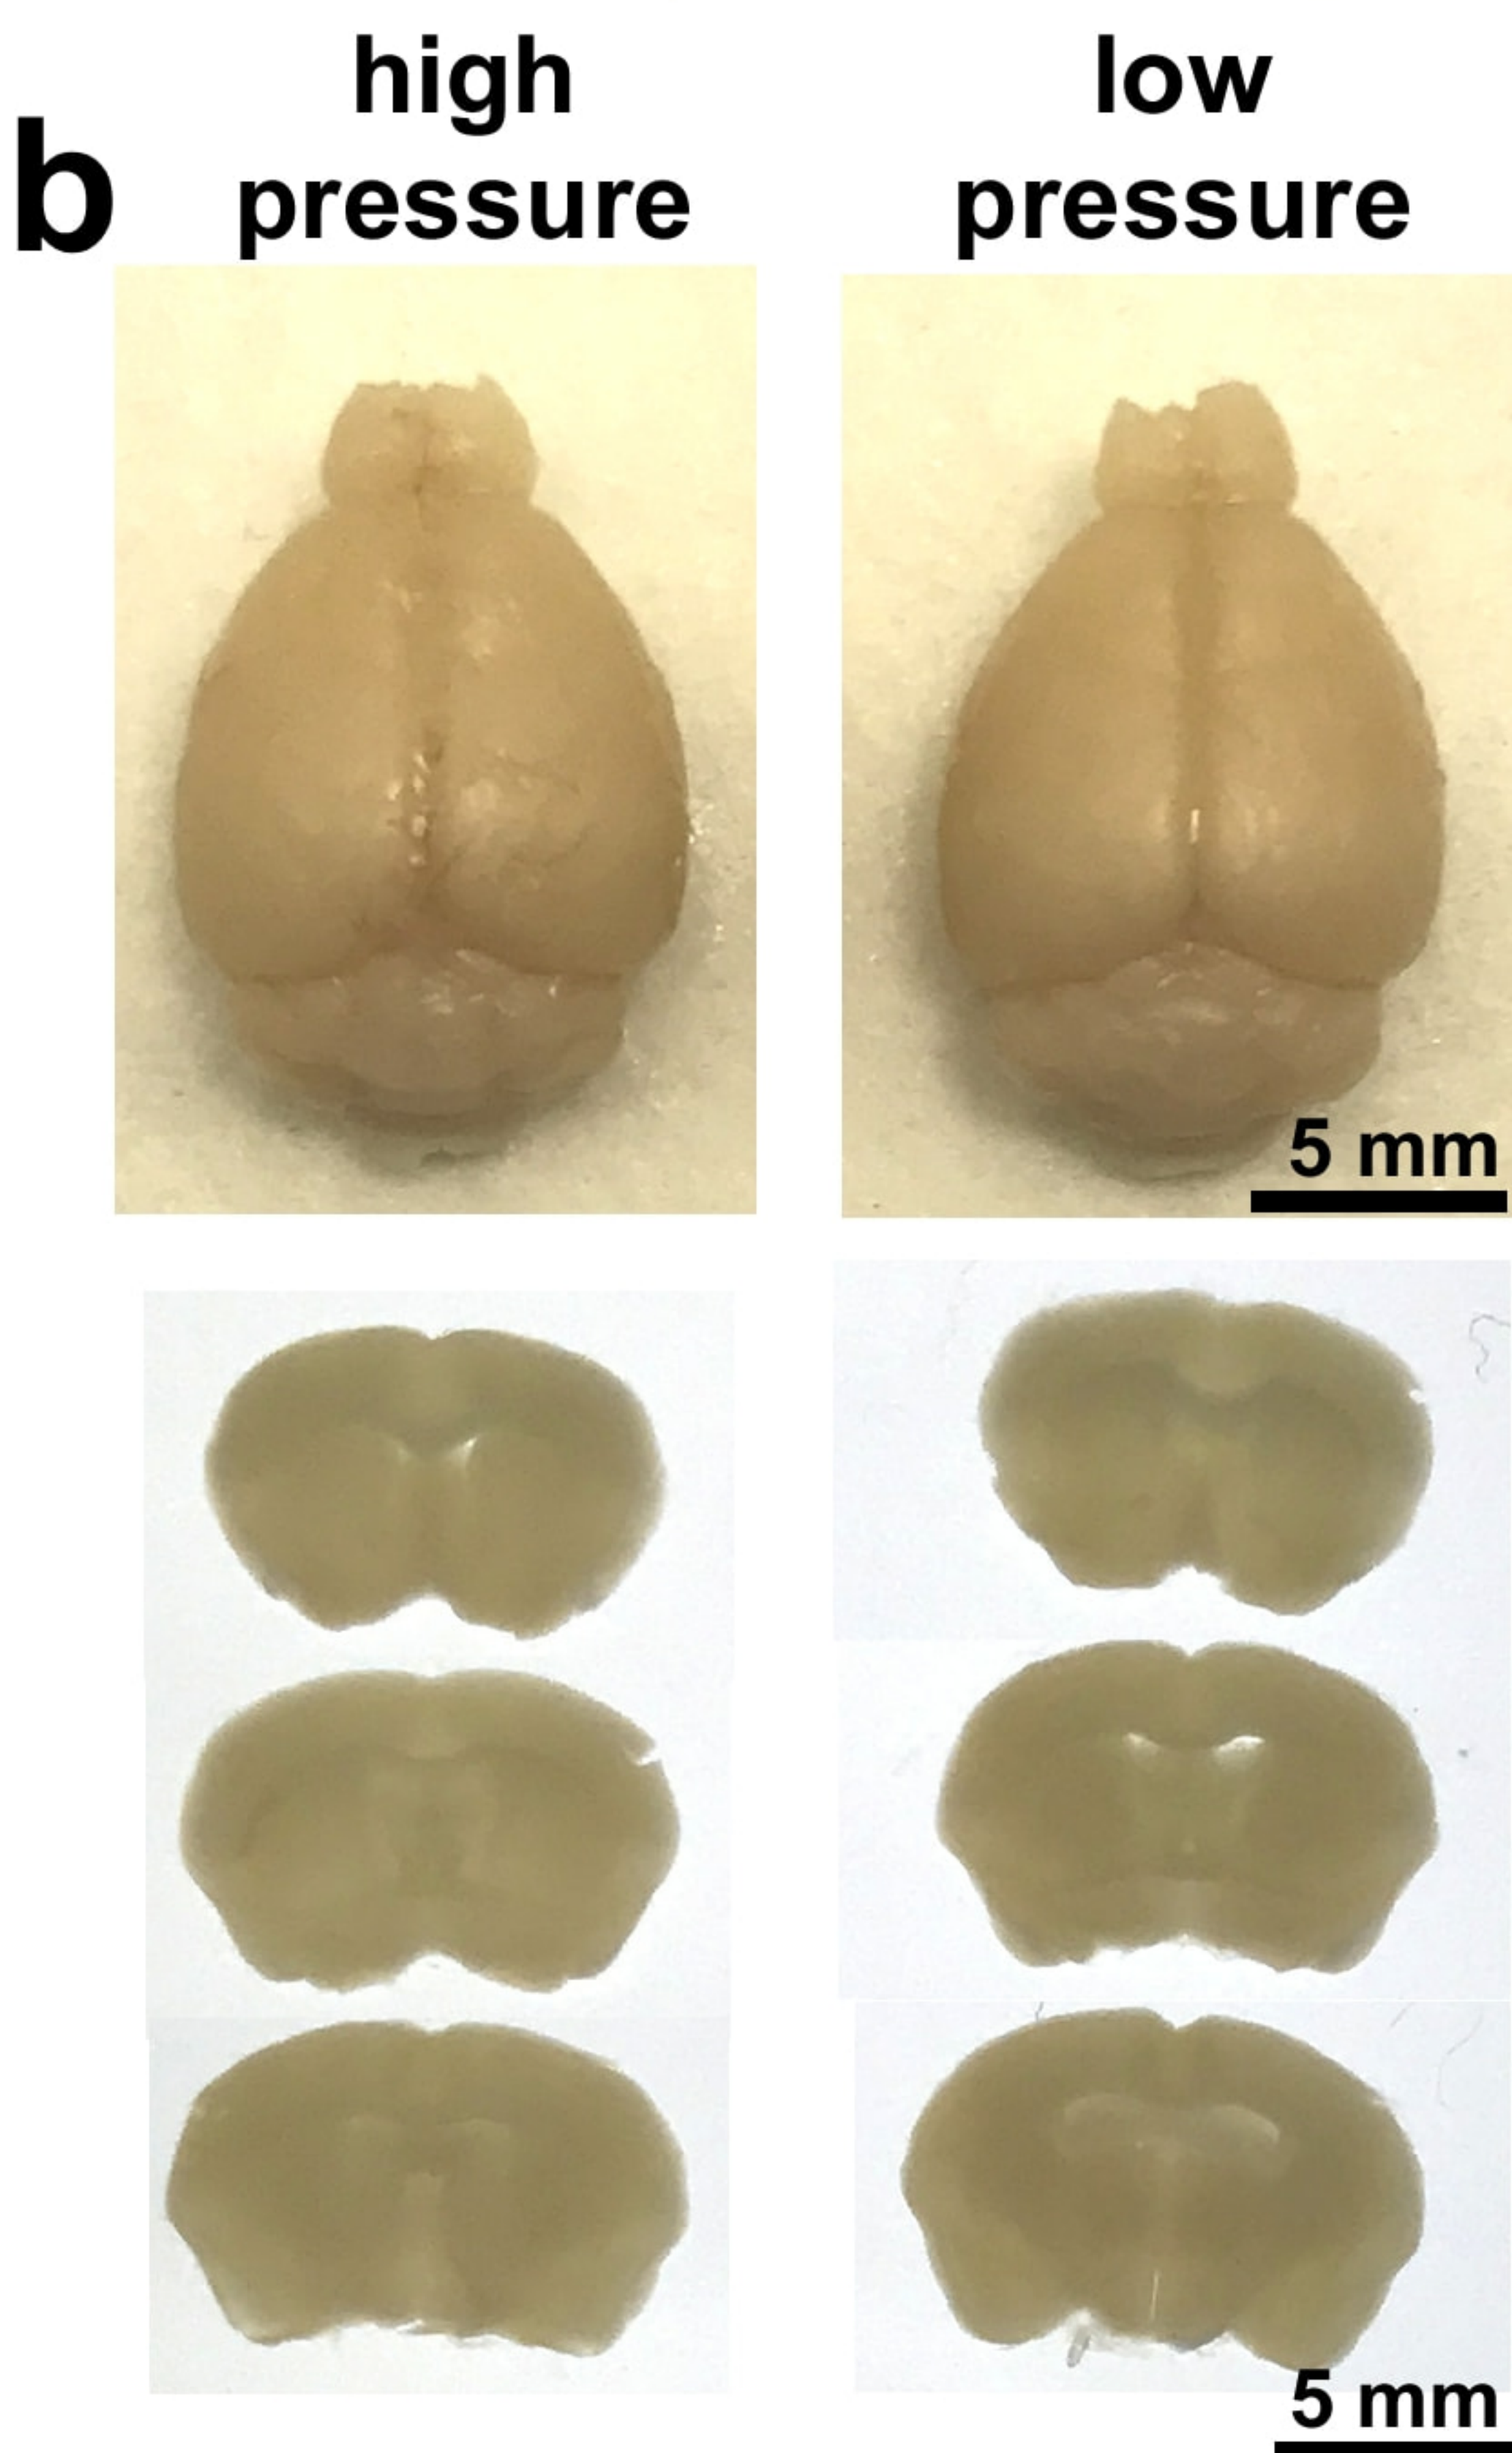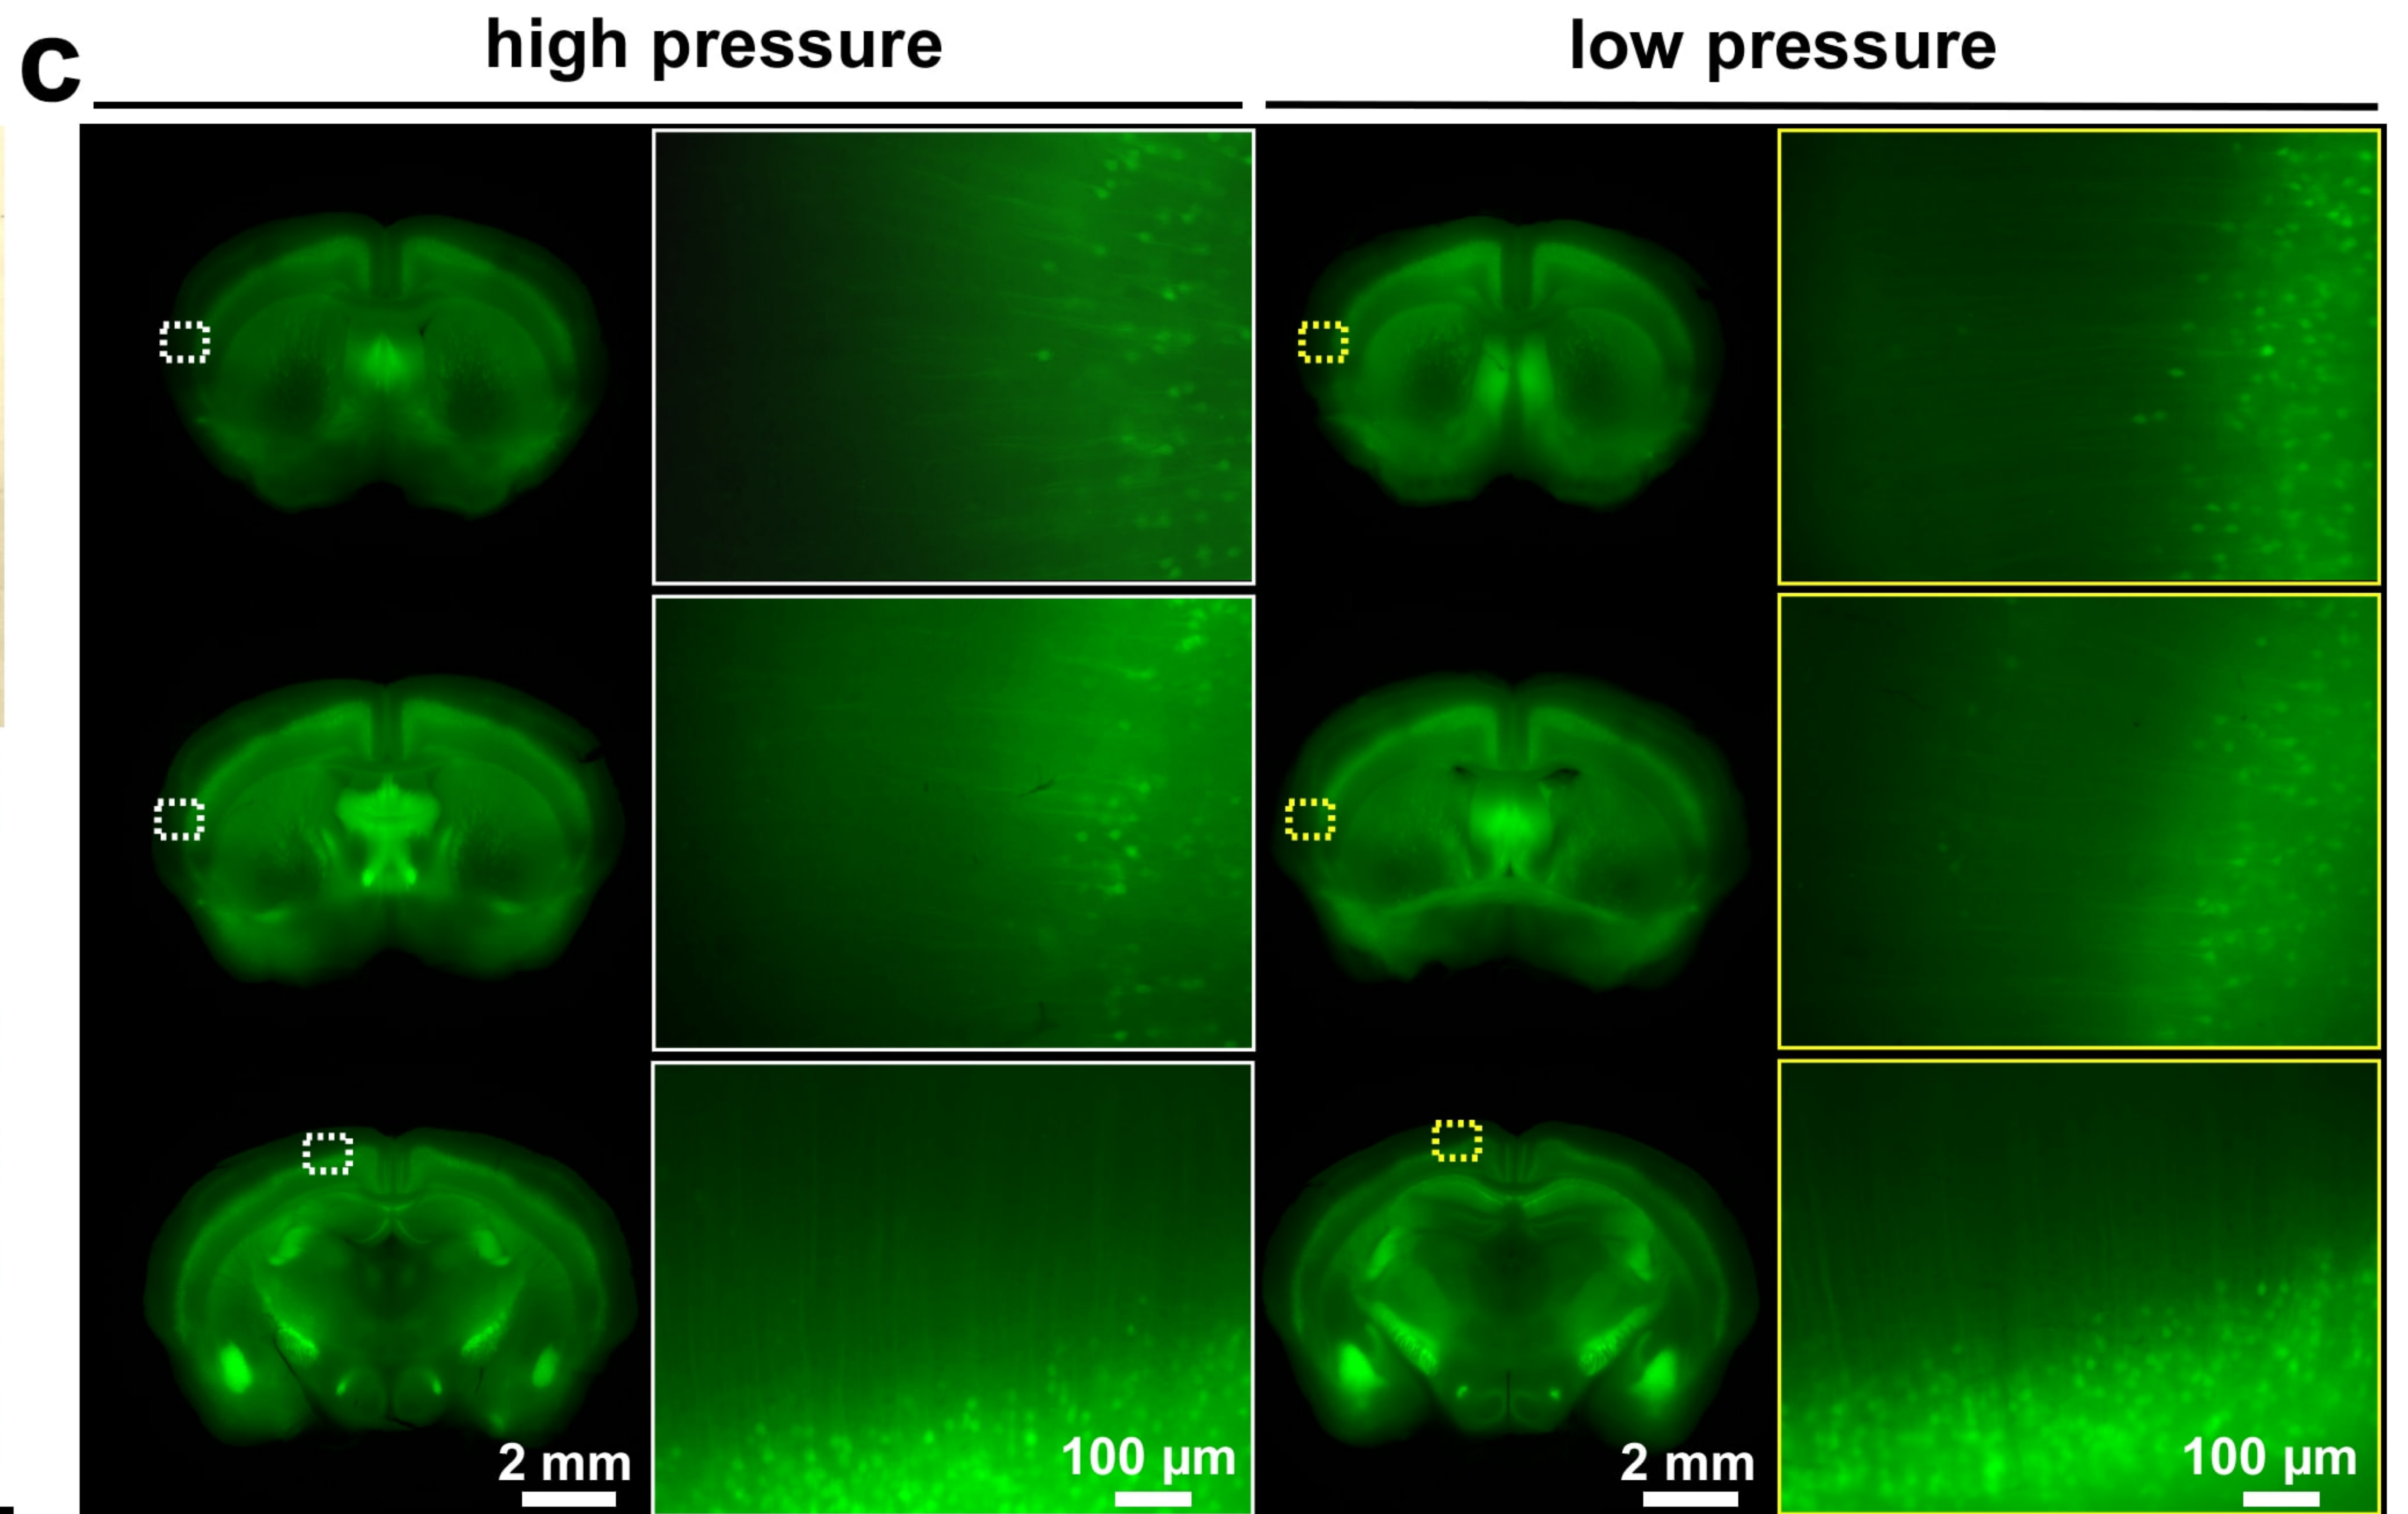

## Supplementary Figure 9

Comparison between *Thy1-YFPH* line mice perfused with high (230 mmHg) or low pressure (110 mmHg)

(a) Images of 3 months old mice taken before and after high or low pressure perfusion for 3 days, showing no morphological organ changes due to high pressure perfusion. (b) Comparison of dissected brains and brain slices from mice after high or low pressure perfusion, showing that the brain was not deformed or disrupted by high pressure perfusion at the macroscopic scale (similar results were observed from 2 independent mice per group) (c) Using a stereo-fluorescent microscope, the cortical neurons were imaged at single cell resolution. No morphology changes in neuronal structures were detected at the microscopic scale indicating that the high (230 mmHg) pressure perfusion in the vDISCO protocol does not damage the tissue (single experiment).



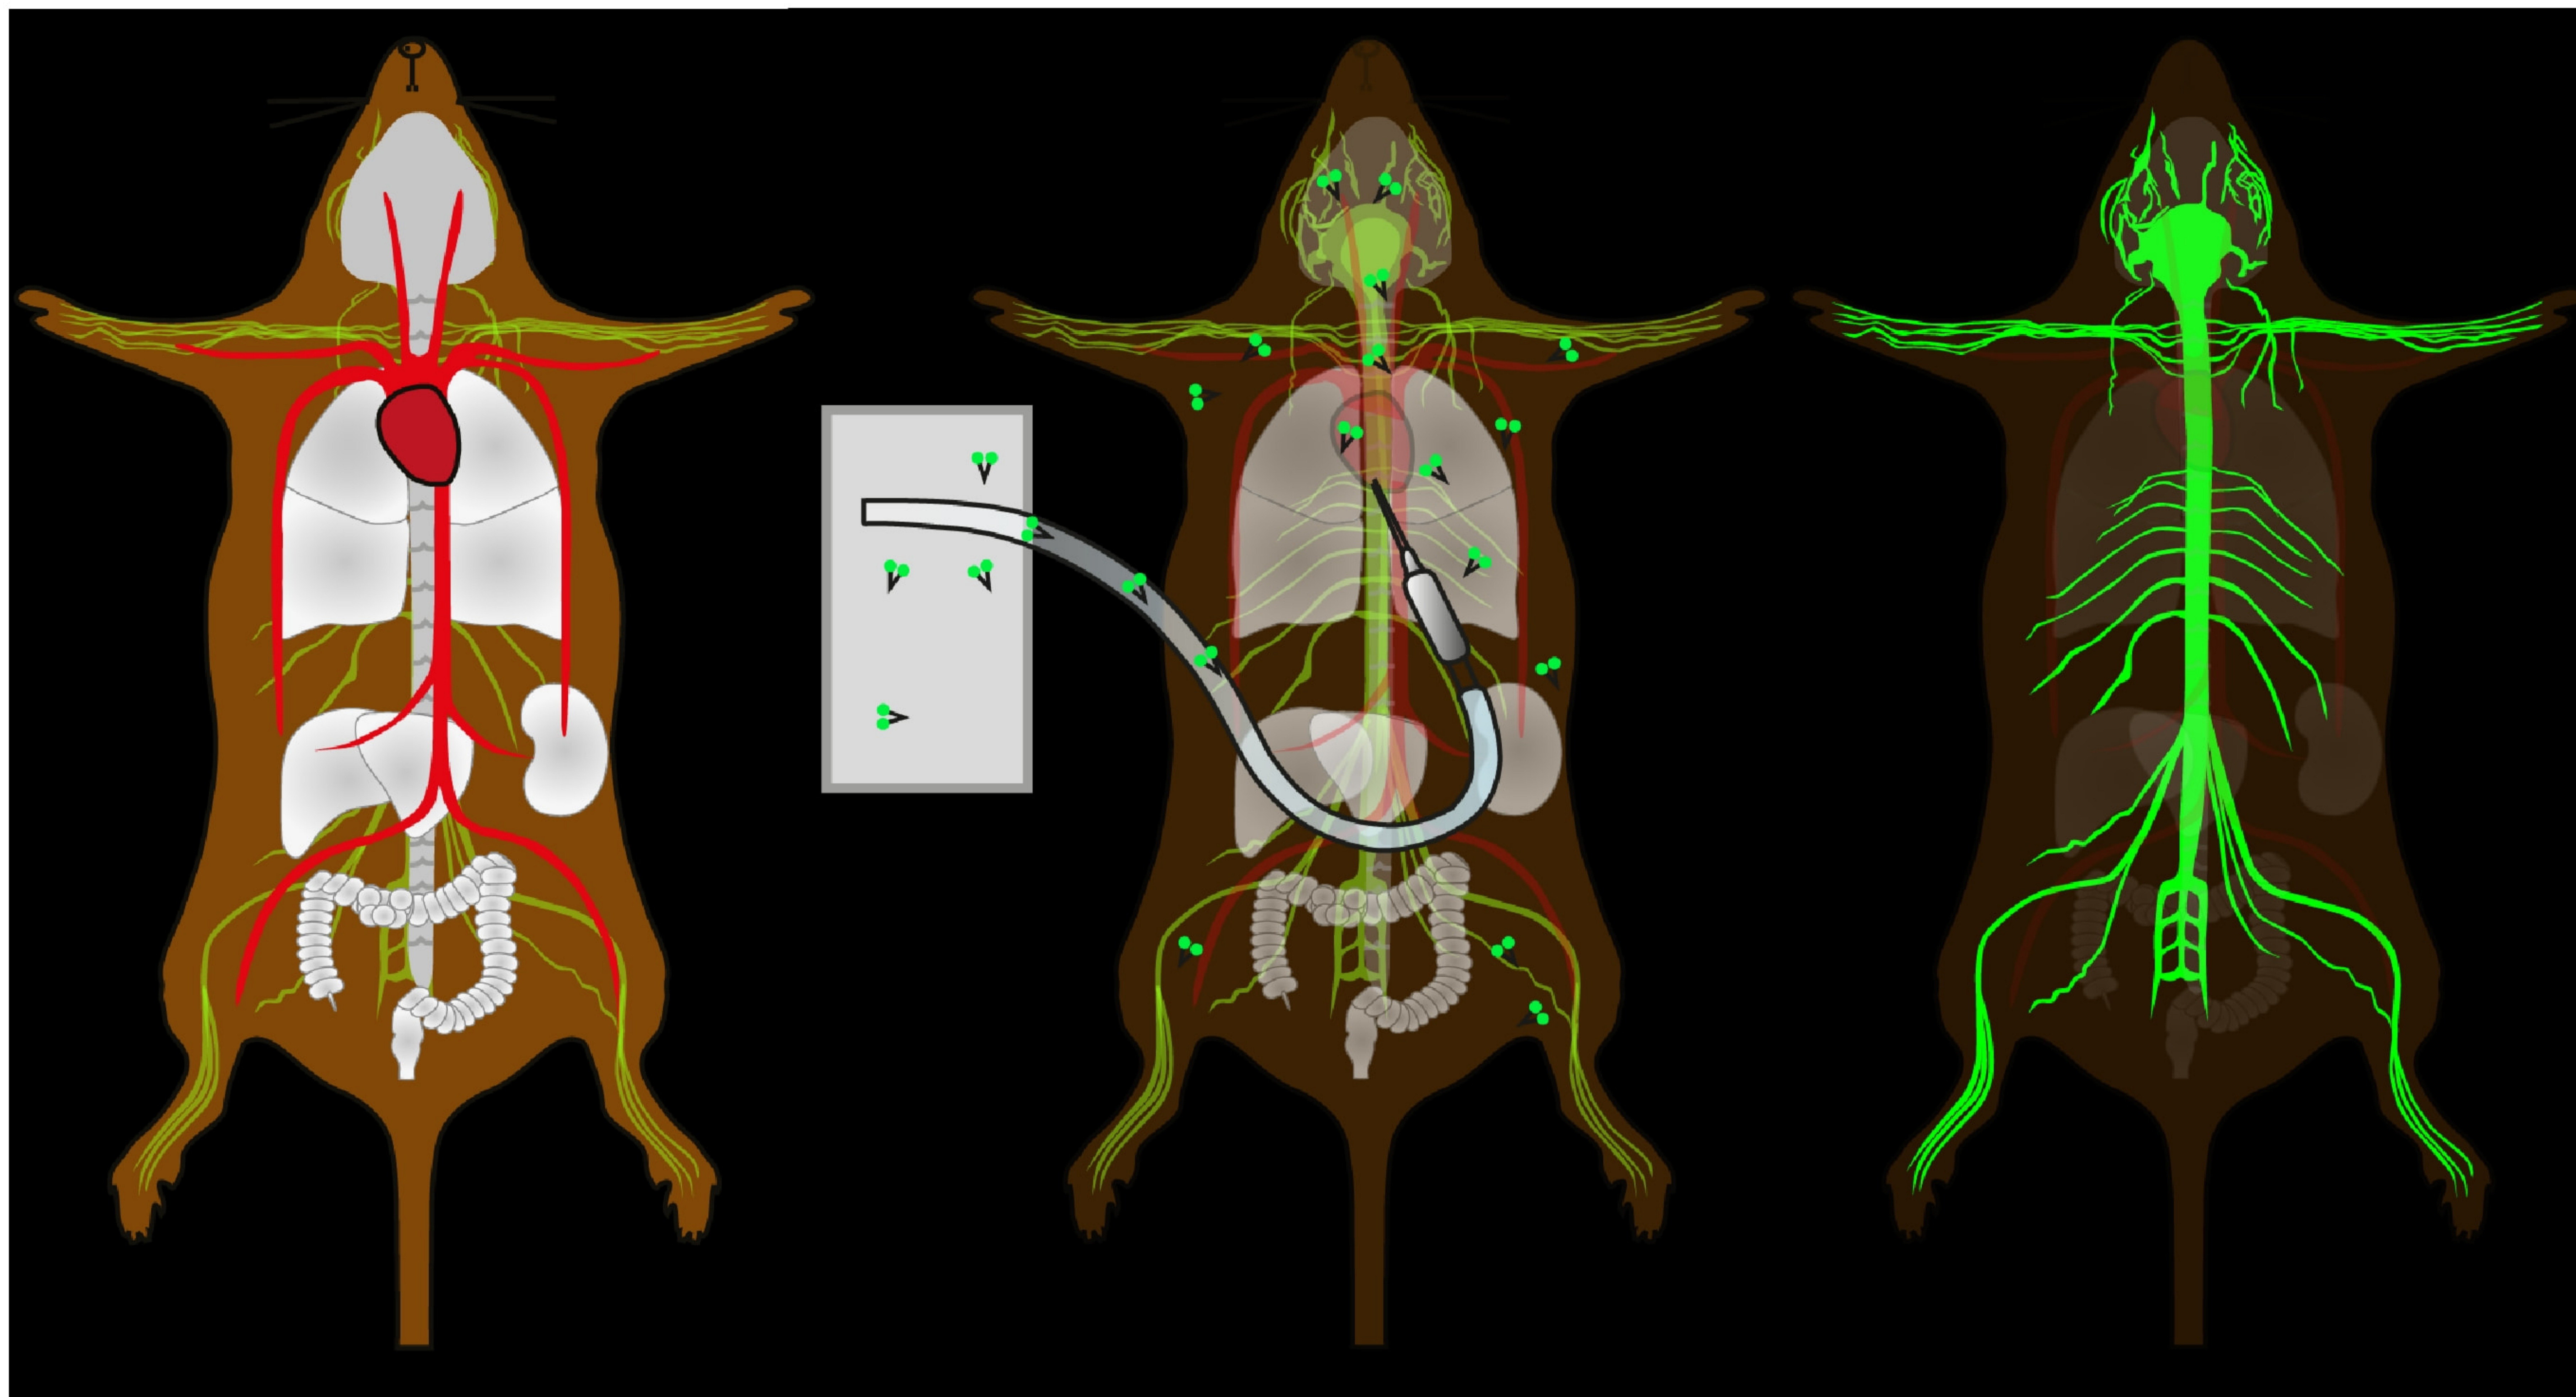

## Supplementary Figure 10

### Schematic illustration of whole-body vDISCO boosting method

The decolorization, decalcification, and nanoboosting steps are performed via transcardiac perfusion. After boosting, the boosted fluorescence signal becomes highly visible over the reduced background in the intact transparent animals.



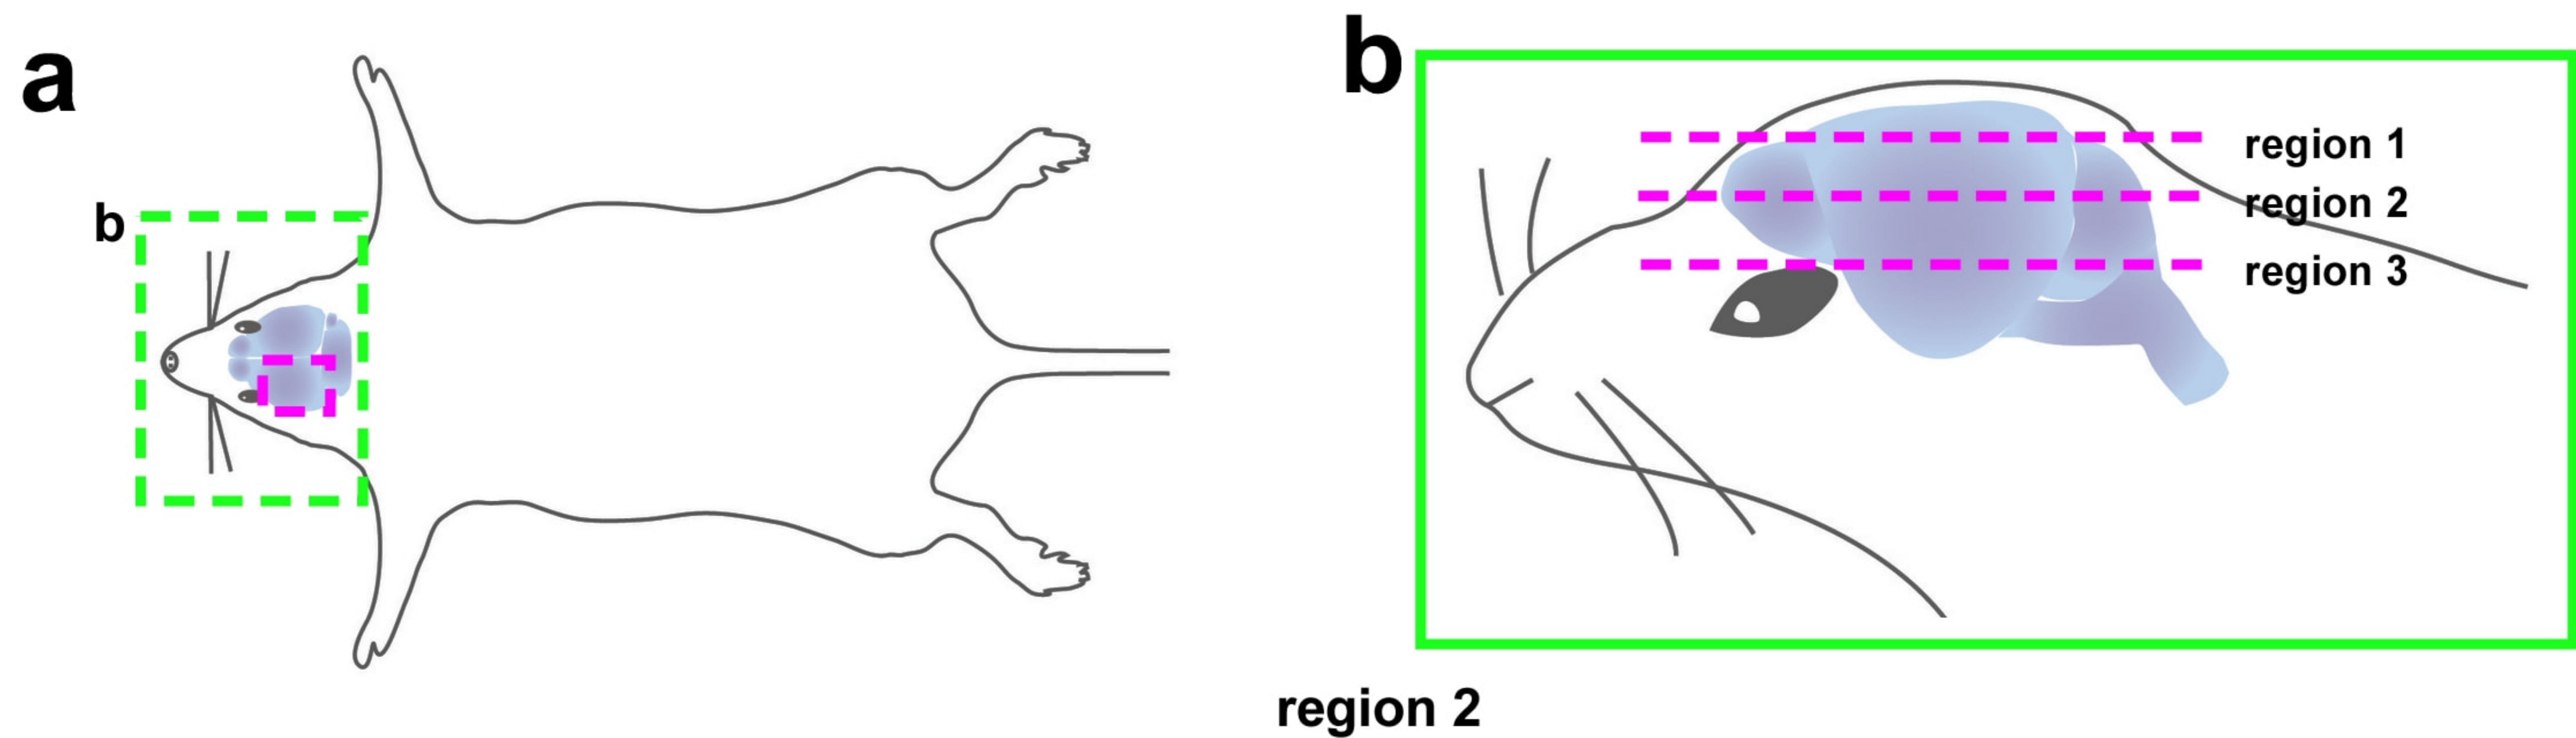

region 2

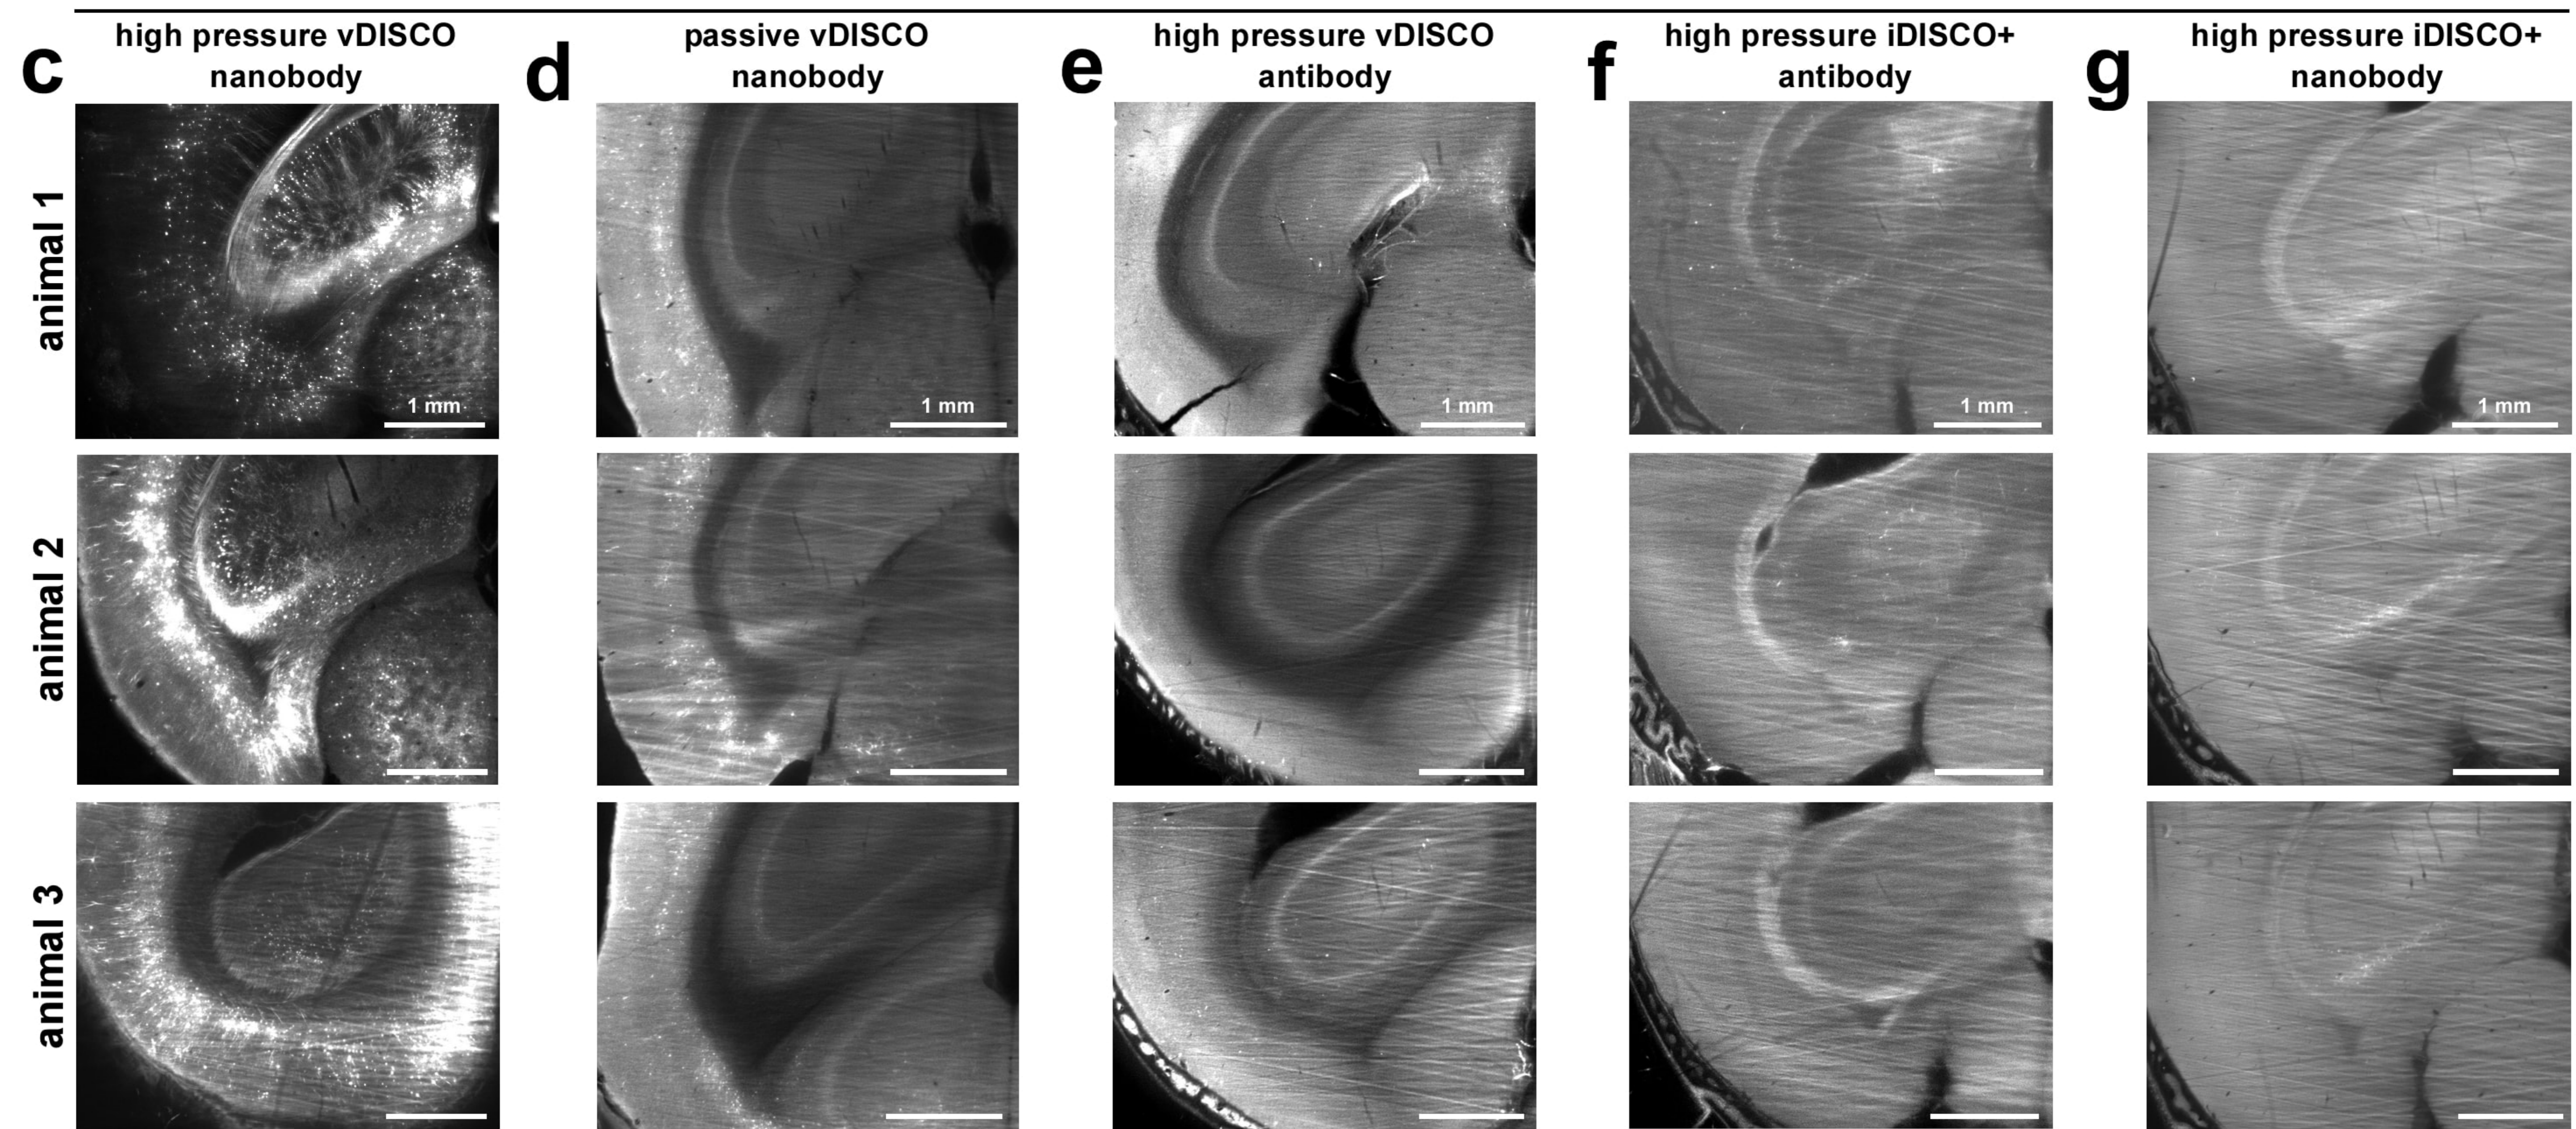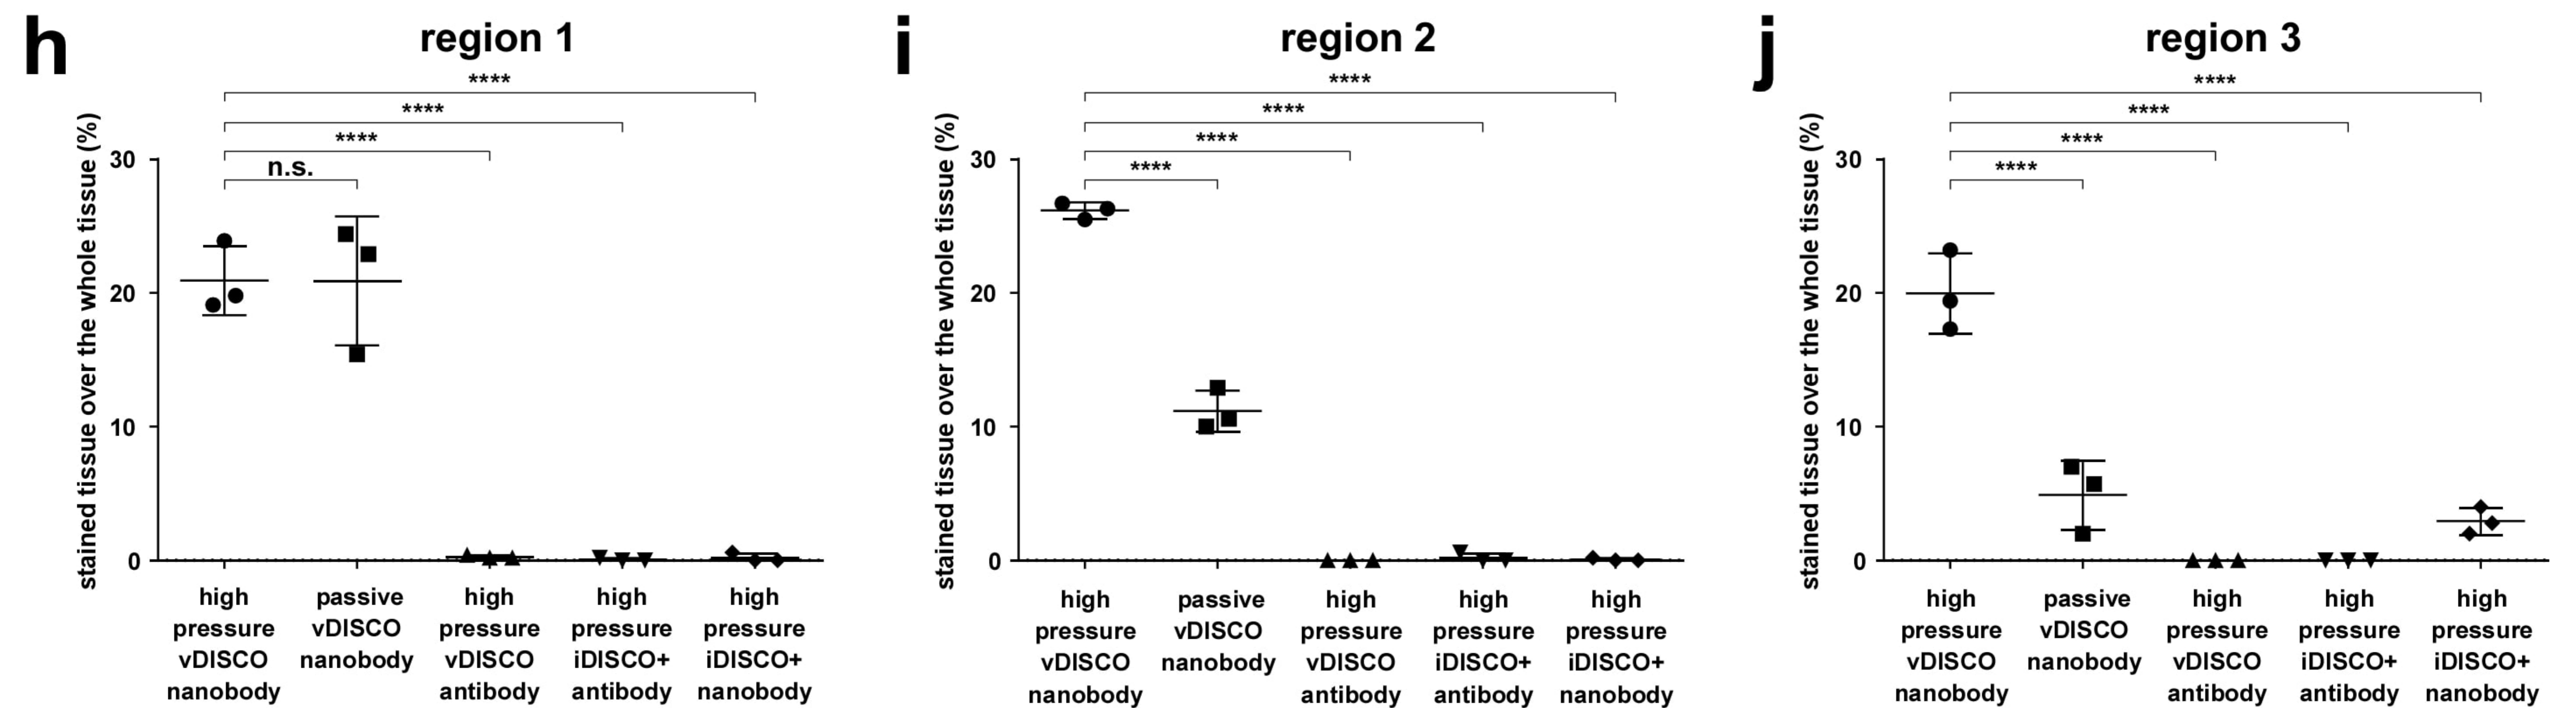

## Supplementary Figure 11

### Whole-body immunolabeling by vDISCO vs. other labeling methods

(a) Illustration showing the anatomic region (dashed magenta rectangle) of the cleared mice imaged for the comparative analysis. (b) Zoom-in illustration at the level of the head of the representative animal showing the 3 different z regions of interest considered for the comparative analysis. (c-g) Light-sheet images of 3 brains from 3 independent cleared animals per each group at the level of region 2 indicated in a and b showing the complete penetration of the nanobody in animals processed with vDISCO method using active high pressure perfusion (c) vs. the partial labeling of the surface of the brain in animals processed with vDISCO with passive incubation of the nanobody (d) and vs. the limited labeling of the brain in animals processed with vDISCO using active high pressure pumping of conventional anti-GFP antibody (e), in animals processed with iDISCO+ using active high pressure pumping of conventional anti-GFP antibody (f) and in animals processed with iDISCO+ using active high pressure pumping of nanobody (g). (h-j) Quantification of the % of stained tissue from the described protocols at the level of region 1 (h), region 2 (i) and region 3 (j). mean  $\pm$  s.d.; n=3 2-3 months old animals per group; statistical significance (n.s.=no significant, \*\*\*\* $p < 0.0001$ , in h:  $F_{4-10}=64.26$ , in i  $F_{4-10}=693.0$ , in j  $F_{4-10}=62.19$ ) was assessed by one-way ANOVA followed by Dunnett's *post hoc* test).







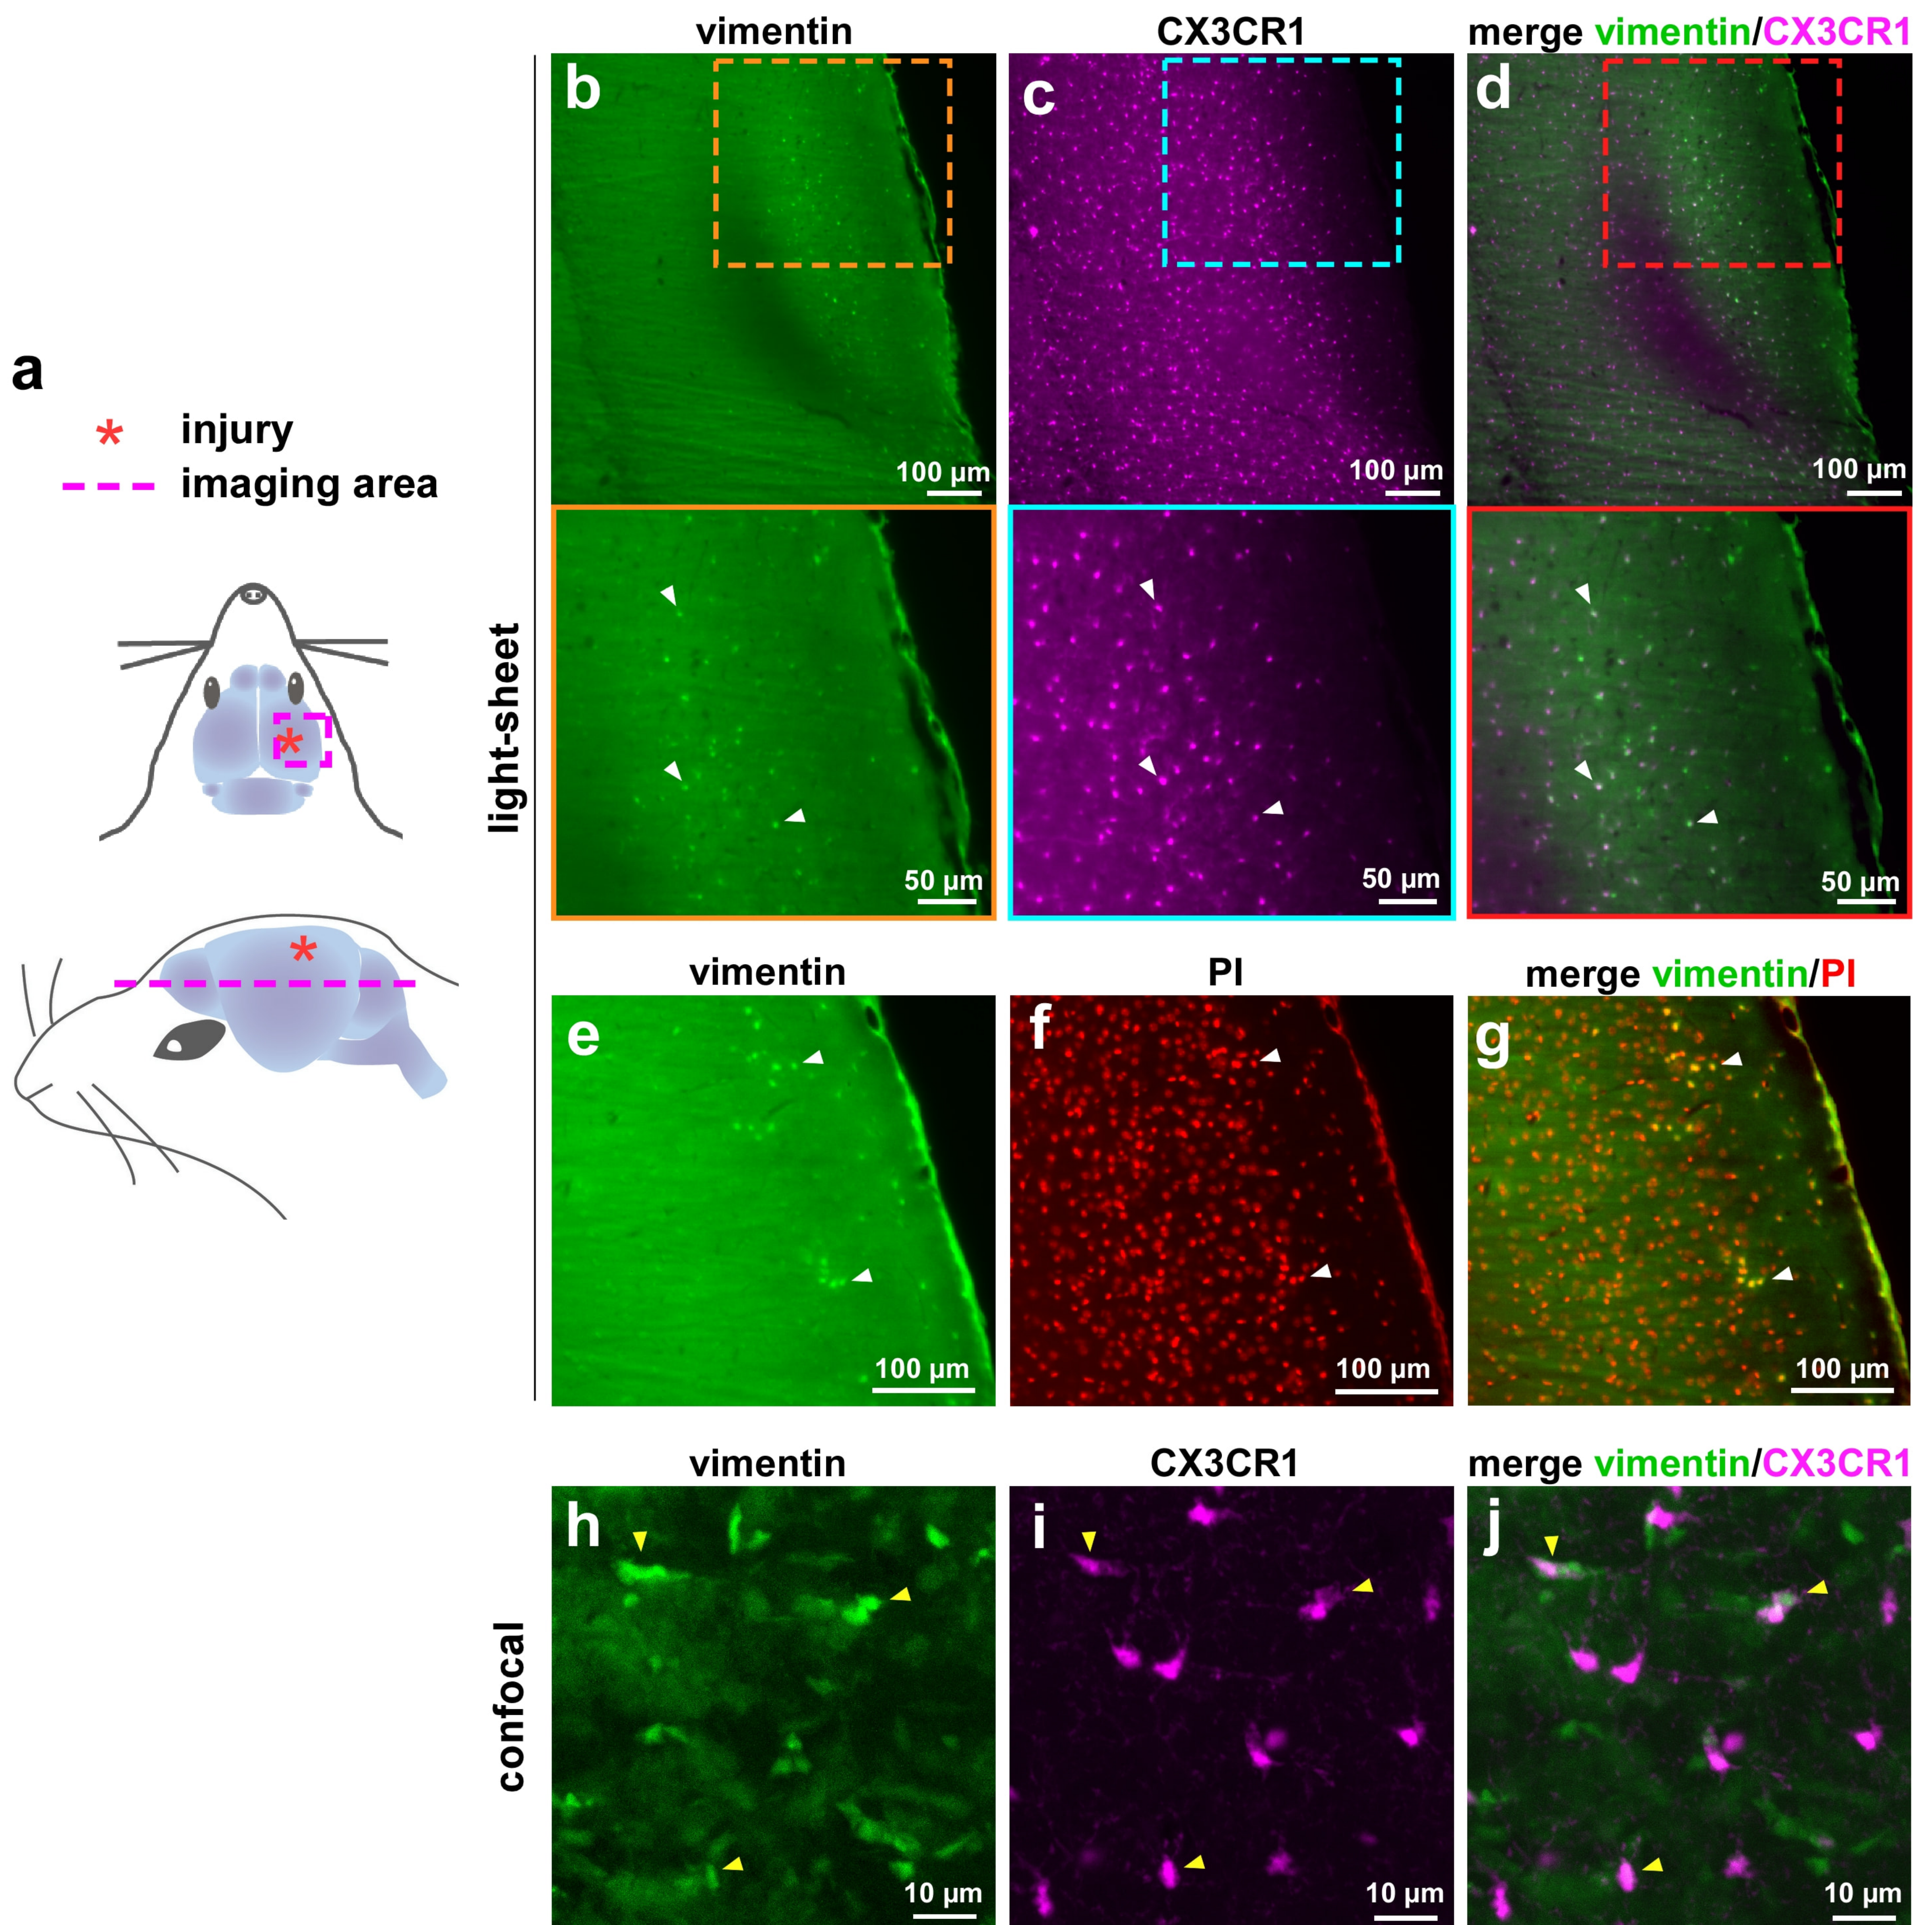

## Supplementary Figure 13

### vDISCO labeling of vimentin expressing cells using anti-vimentin nanobody

(a) Illustration showing the injury location of the brain trauma (red asterisk) and the imaging area (magenta dashed line). (b-d) Light-sheet imaging of a mouse brain from traumatic brain injured 4 months old CX3CR1<sup>GFP/+</sup> animal 1 month after the injury: vimentin was labeled using anti-vimentin 488-nanobooster (green), in which the autofluorescence of the tissue is much higher than in the far-red spectrum. (b) CX3CR1 GFP+ cells were boosted using anti-GFP 647-nanobooster (magenta) (c), the colocalization of CX3CR1 GFP+ immune cells expressing vimentin is visible in white in the merge panel (d). The colored rectangles show zoom-in images of the dashed regions in b-d. White arrow-heads indicate examples of colocalizing signal in cells. (e-g) Light-sheet imaging of the same brain from the TBI CX3CR1<sup>GFP/+</sup> animal in b-d: vimentin is shown in green (e), while all nuclei of the cells were labeled using propidium iodide (PI) (red) (f), the colocalization of the signal in cells expressing vimentin and stained with PI is visible in yellow in the merge panel (g). White arrow-heads indicate examples of colocalizing signal in cells. (h-j) Confocal imaging of the mouse brain in b-d showing vimentin (green) (h) and CX3CR1 GFP+ cells (magenta) (i), the colocalization of CX3CR1 GFP+ immune cells expressing vimentin is visible in white and indicated by yellow arrow-heads in the merge panel (j). Single experiment.



lateral

dorsal view

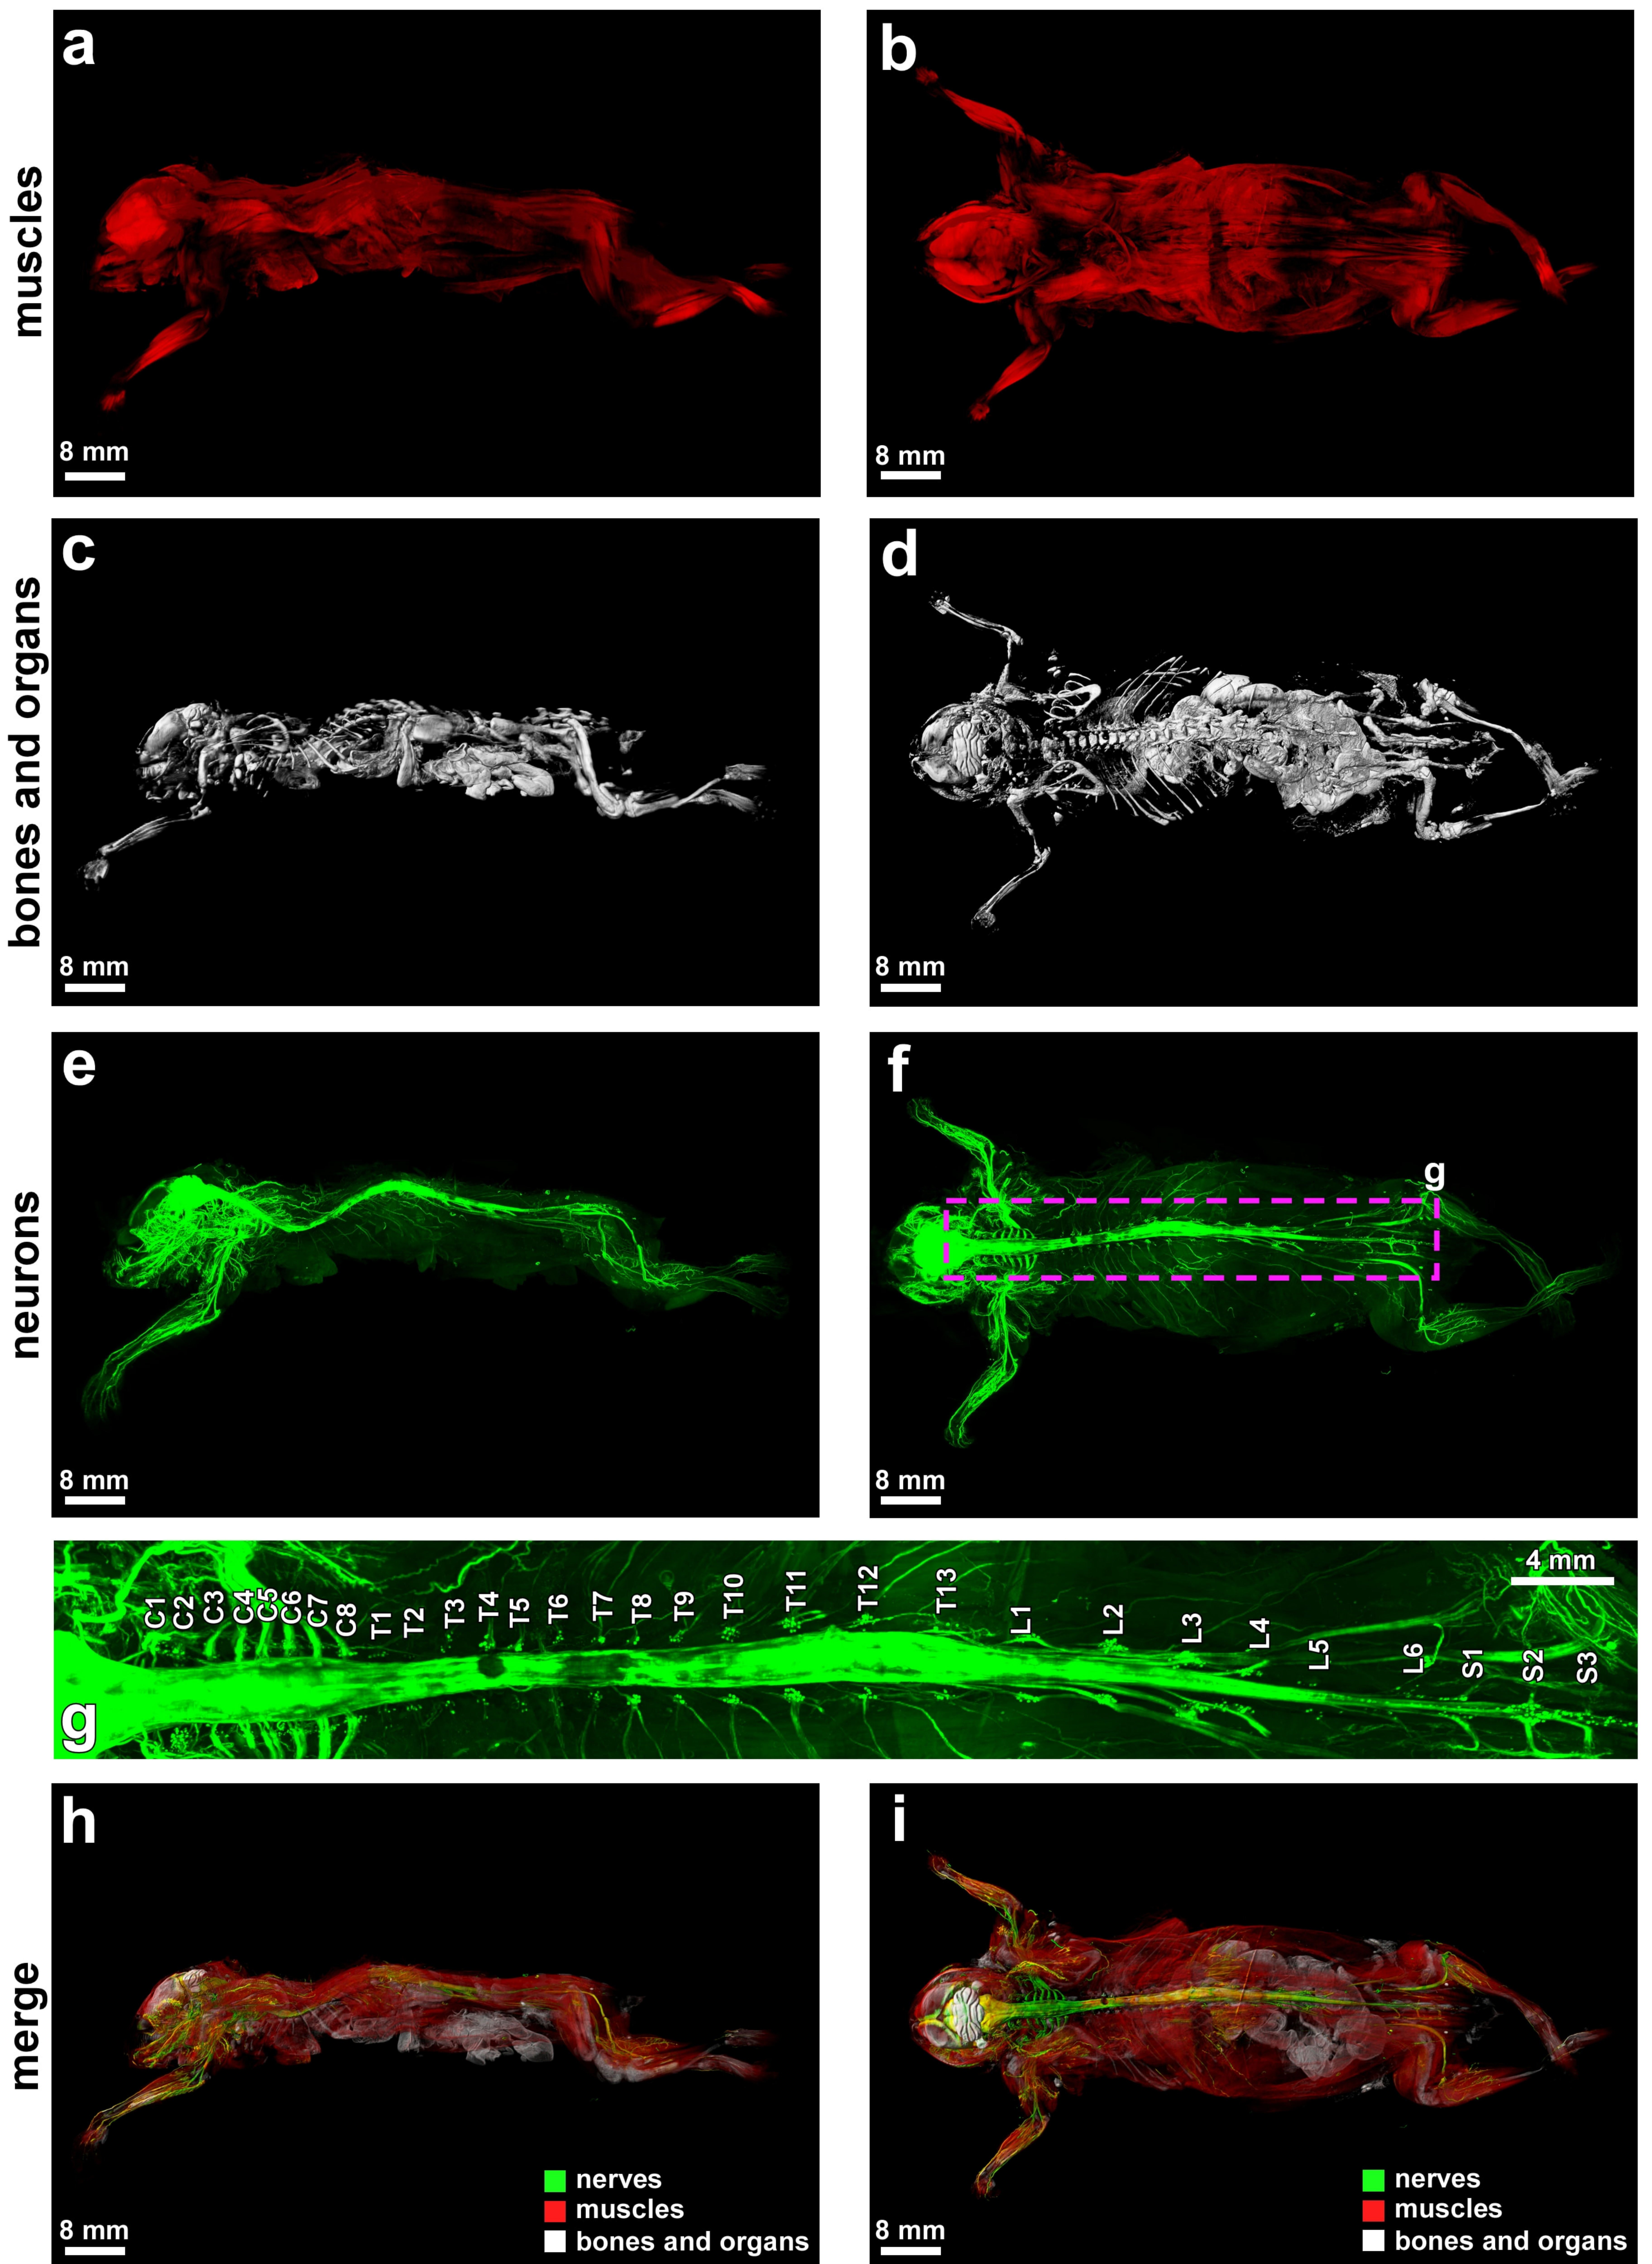

## Supplementary Figure 14

**Whole body neuronal projections of a *Thy1*-GFPM mouse by panoptic imaging**  
**(a-d)** The lateral and dorsal views of autofluorescence (muscles), and PI (bones and organs) channels. **(e,f)** Neuronal projections of the whole body in lateral and dorsal views. **(g)** High magnification view from the indicated region in **f** showing details of spinal cord segments. **(h,i)** The merge channels in lateral **(h)** and dorsal **(i)** views of neurons, bones and organs, and muscles are shown. Comparable labeling and imaging results were achieved in 5 independent animals, whole body reconstruction was done in one mouse.



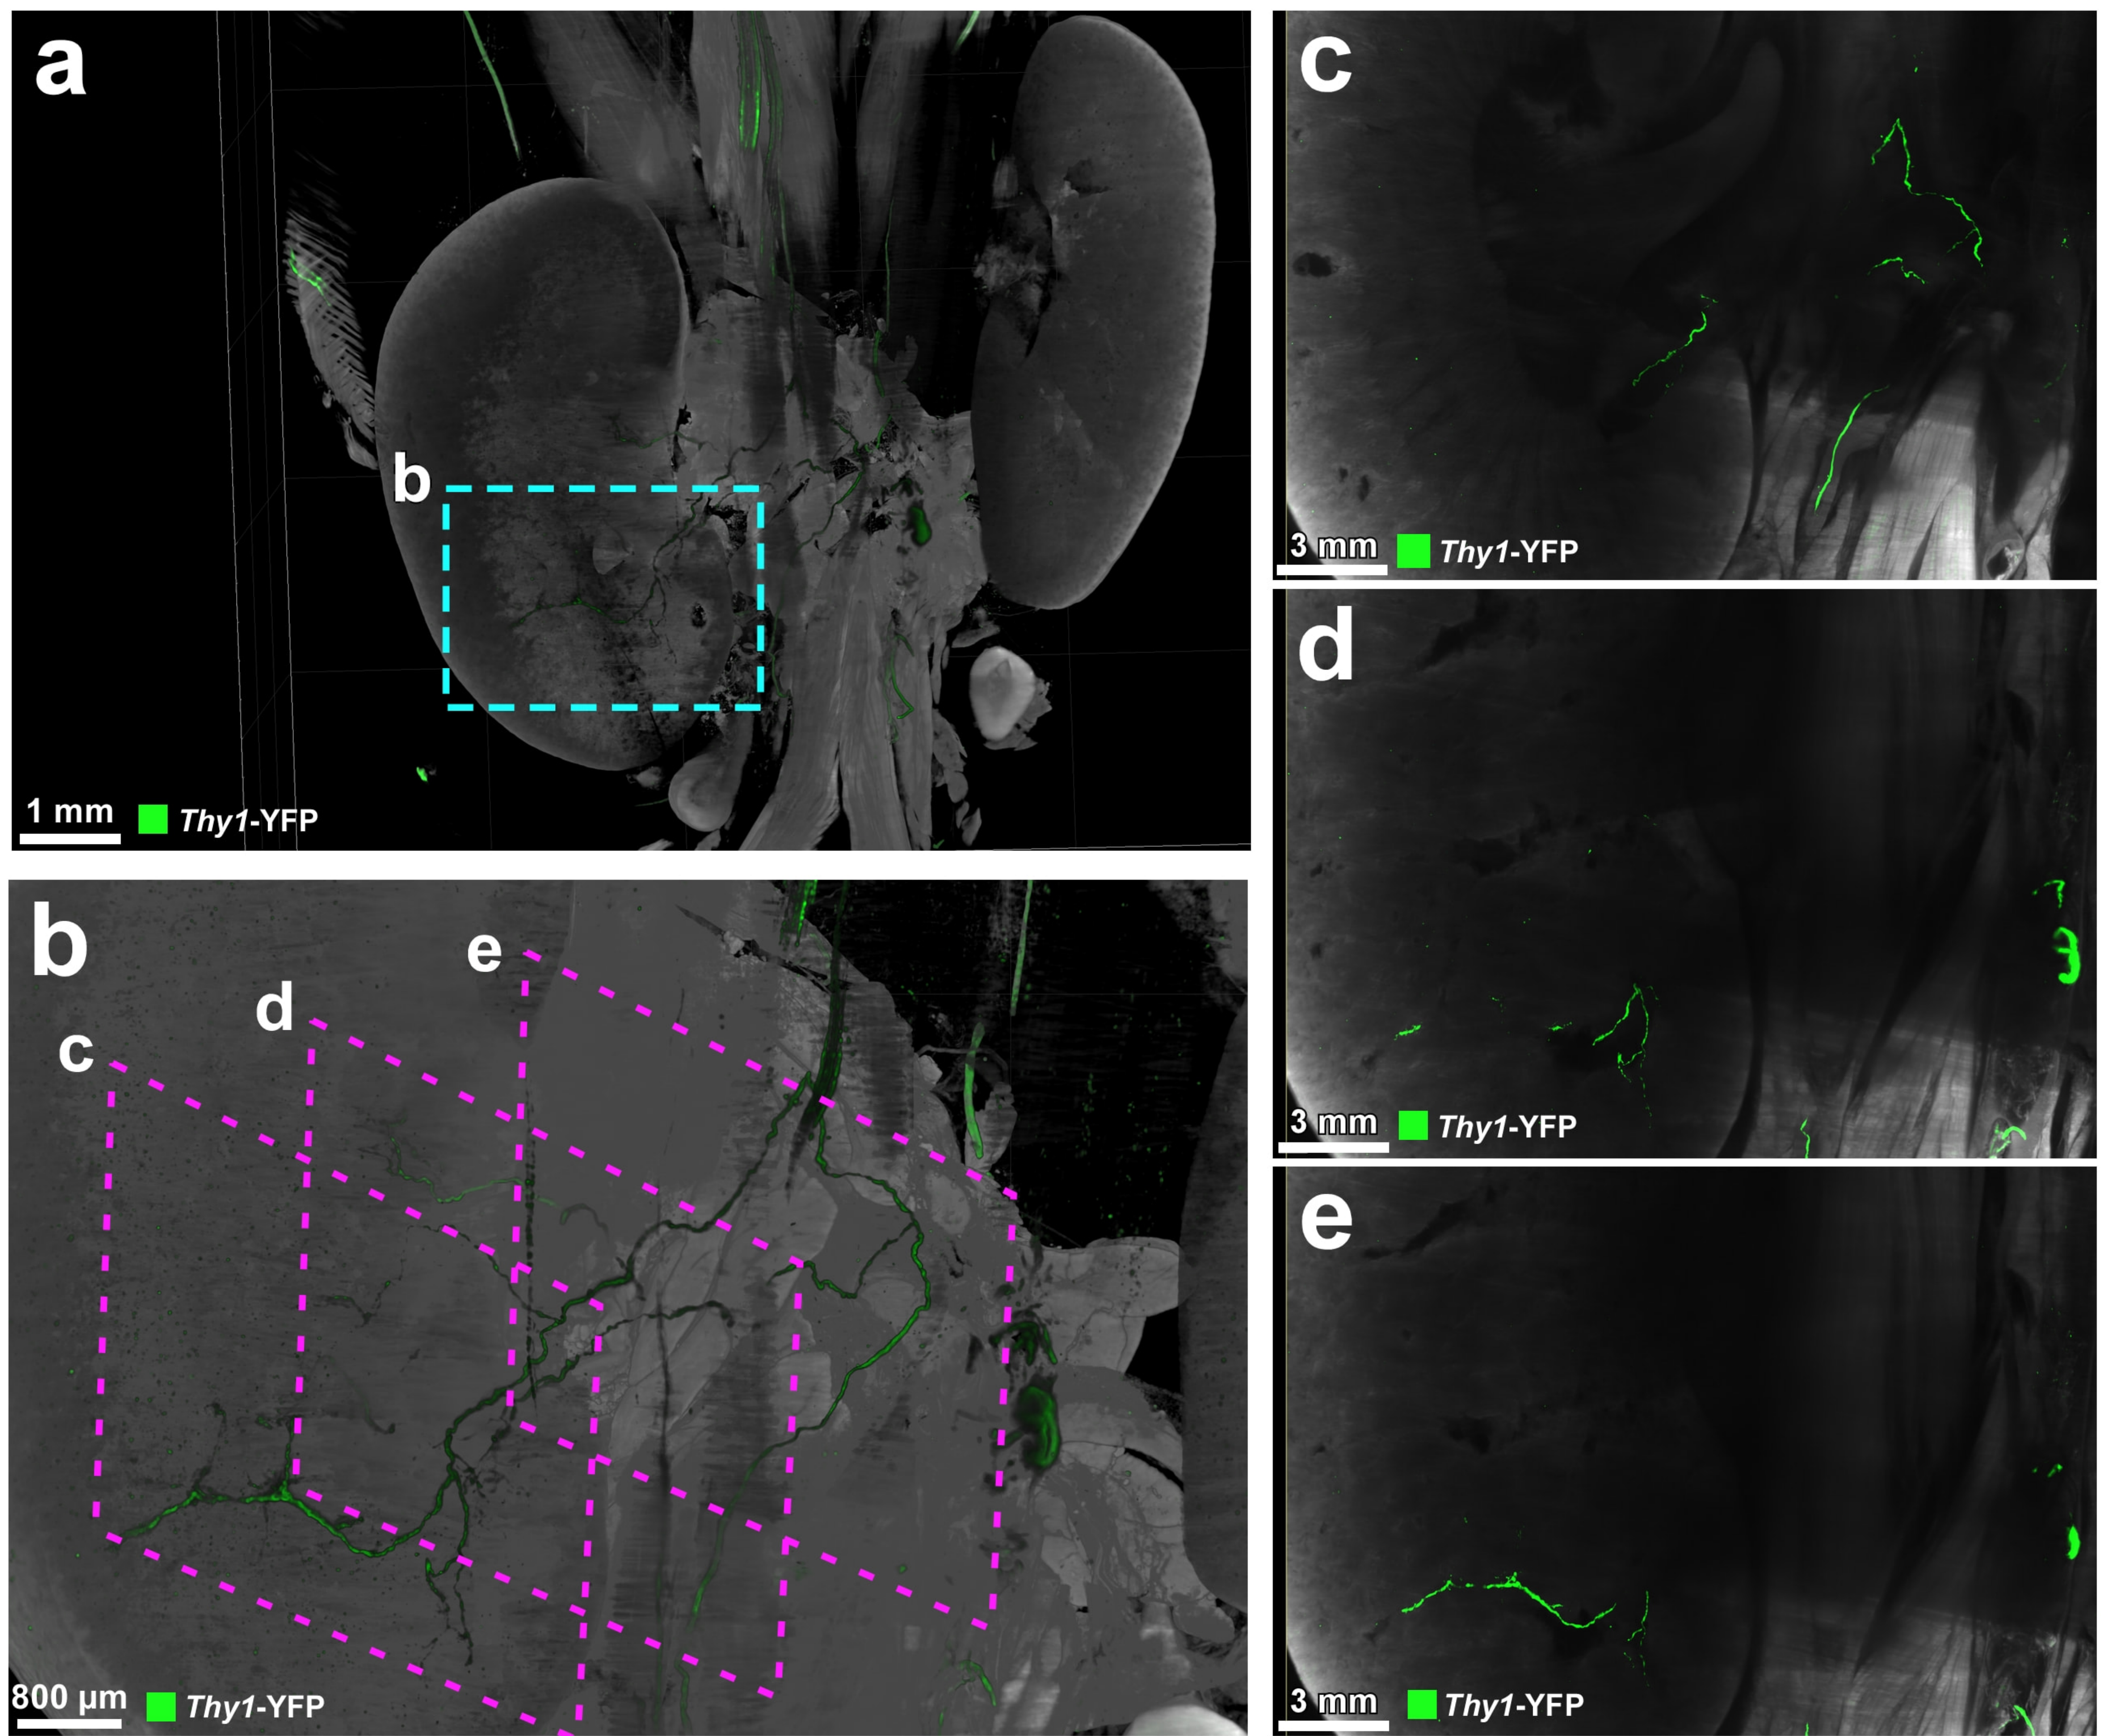

## Supplementary Figure 15

### Peripheral nerves innervating kidneys in *Thy1-YFP* mouse

(a) 3D visualization of nerves innervating the kidneys of a 7 months old *Thy1-YFP* animal. (b) Zoom image from the marked region in a. (c-e) 2D projection images of the kidney at the indicated depths in b. Single experiment.



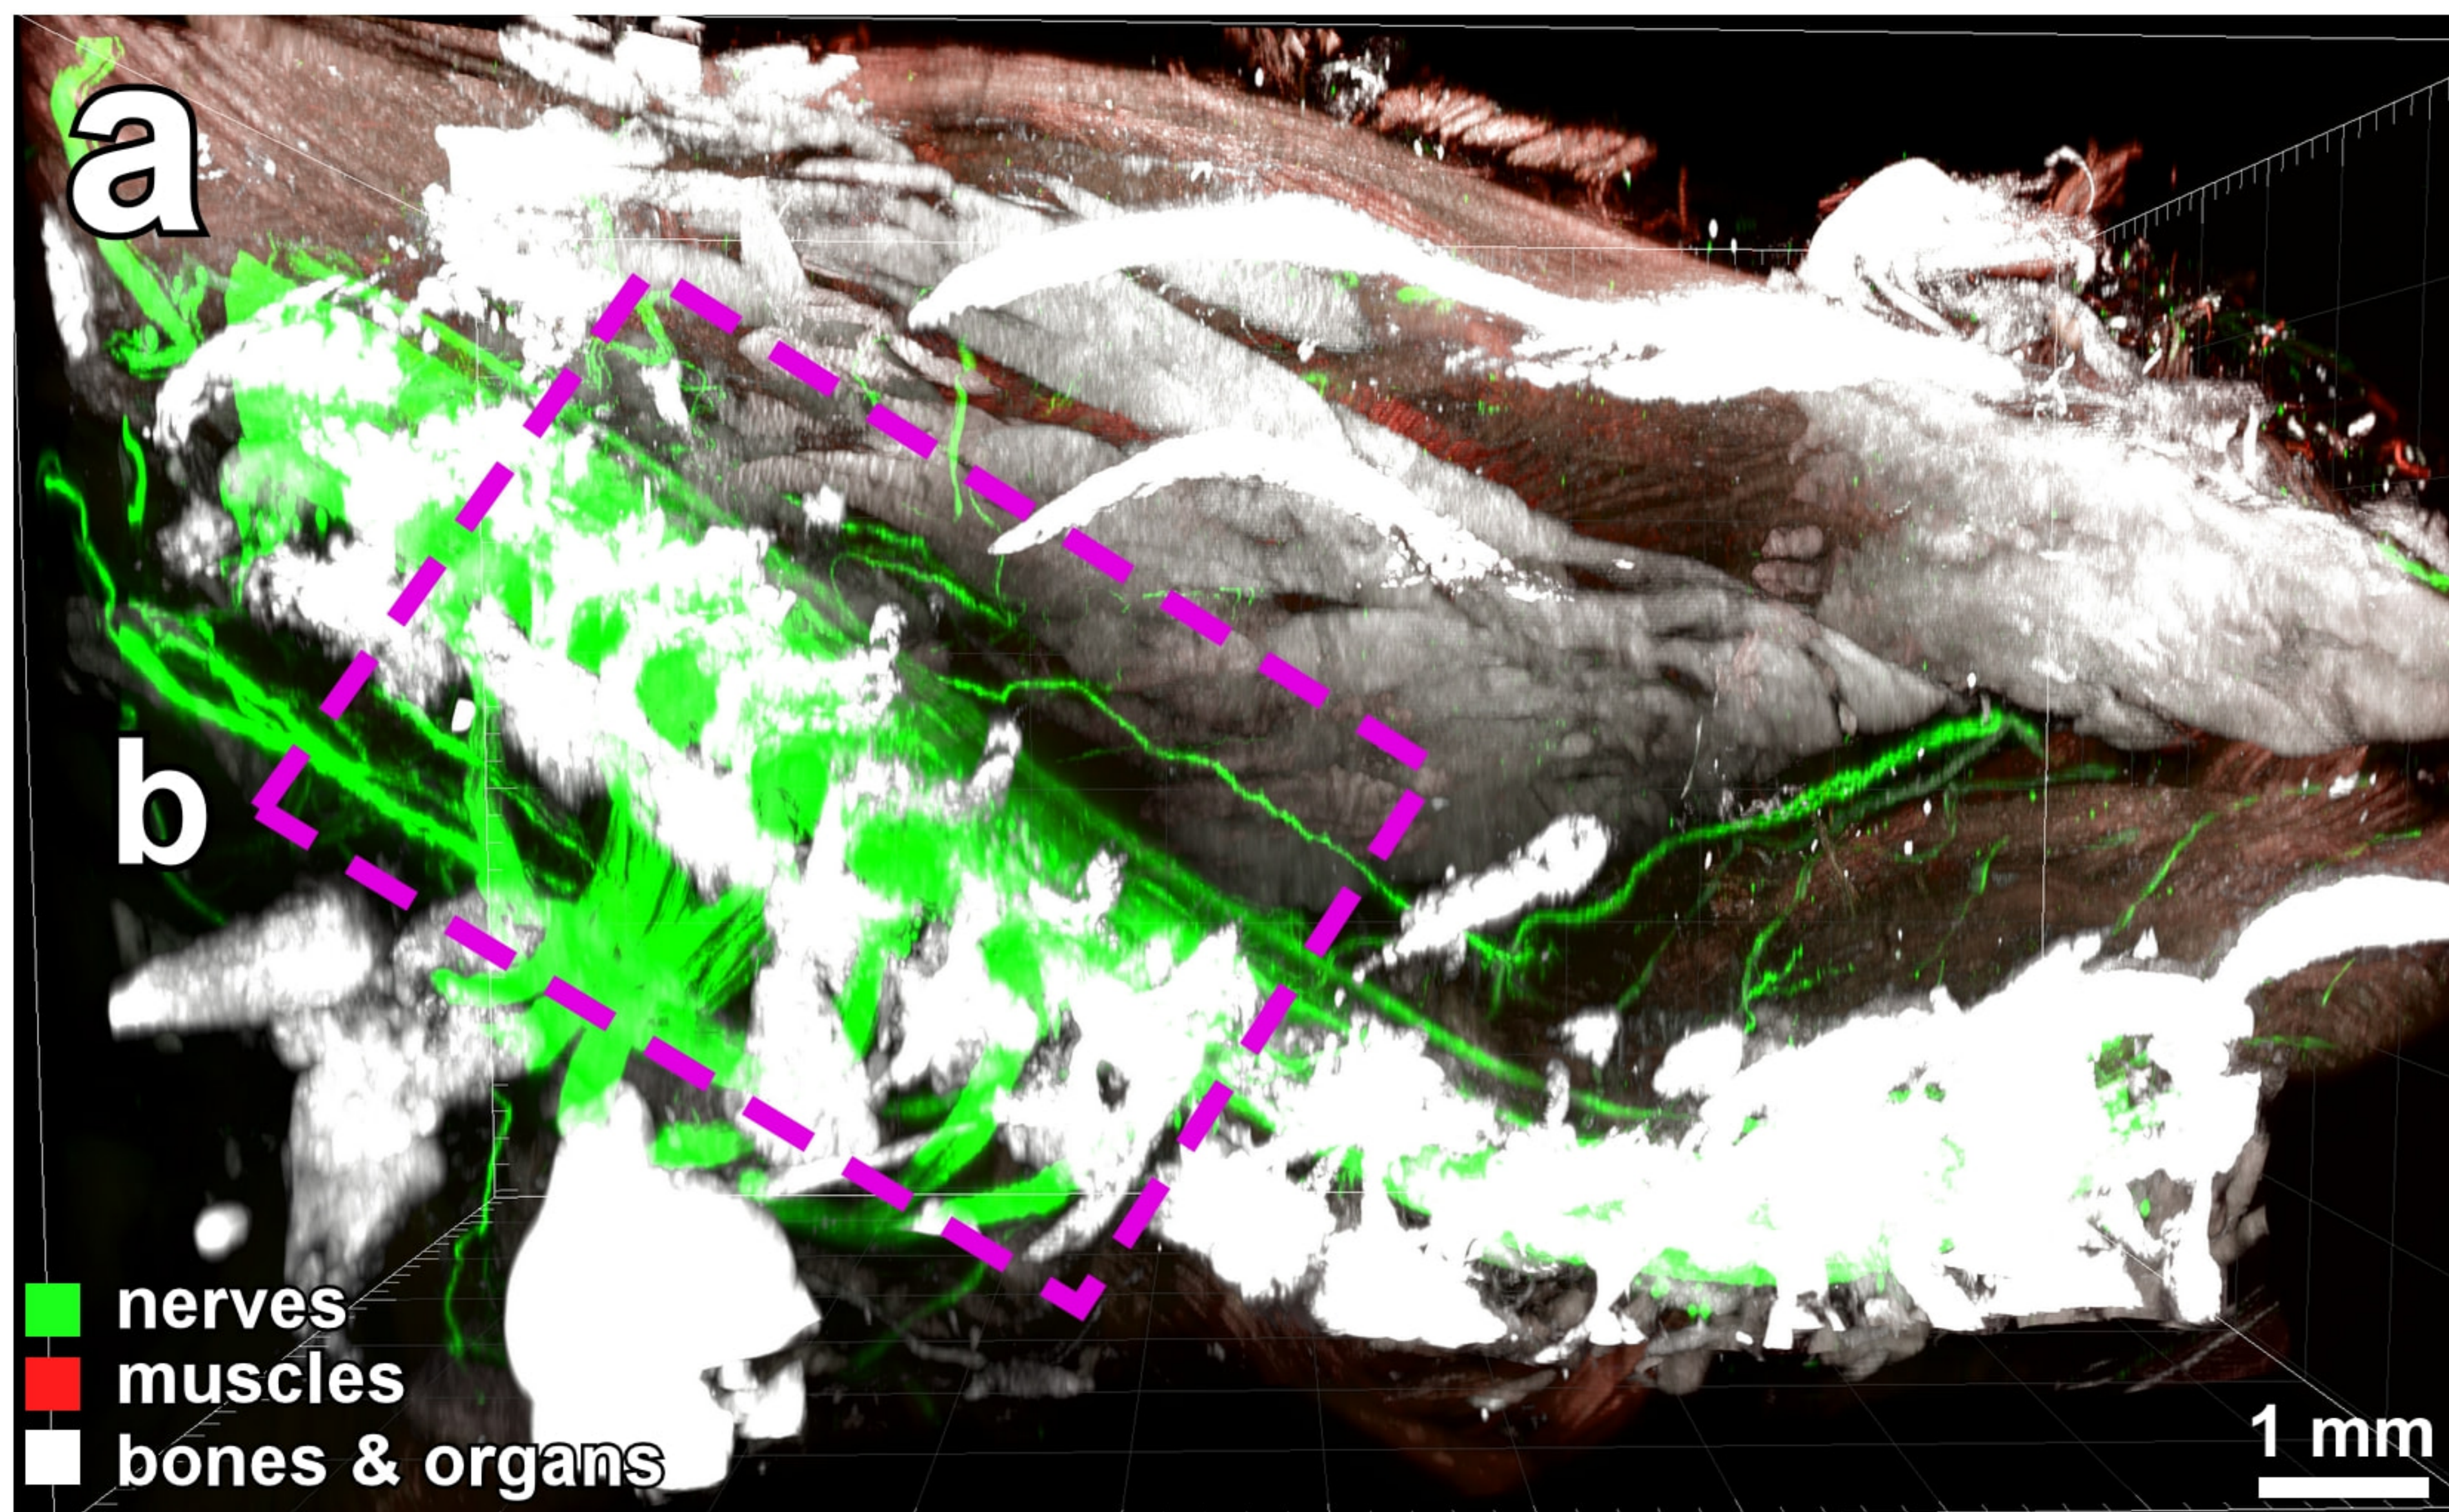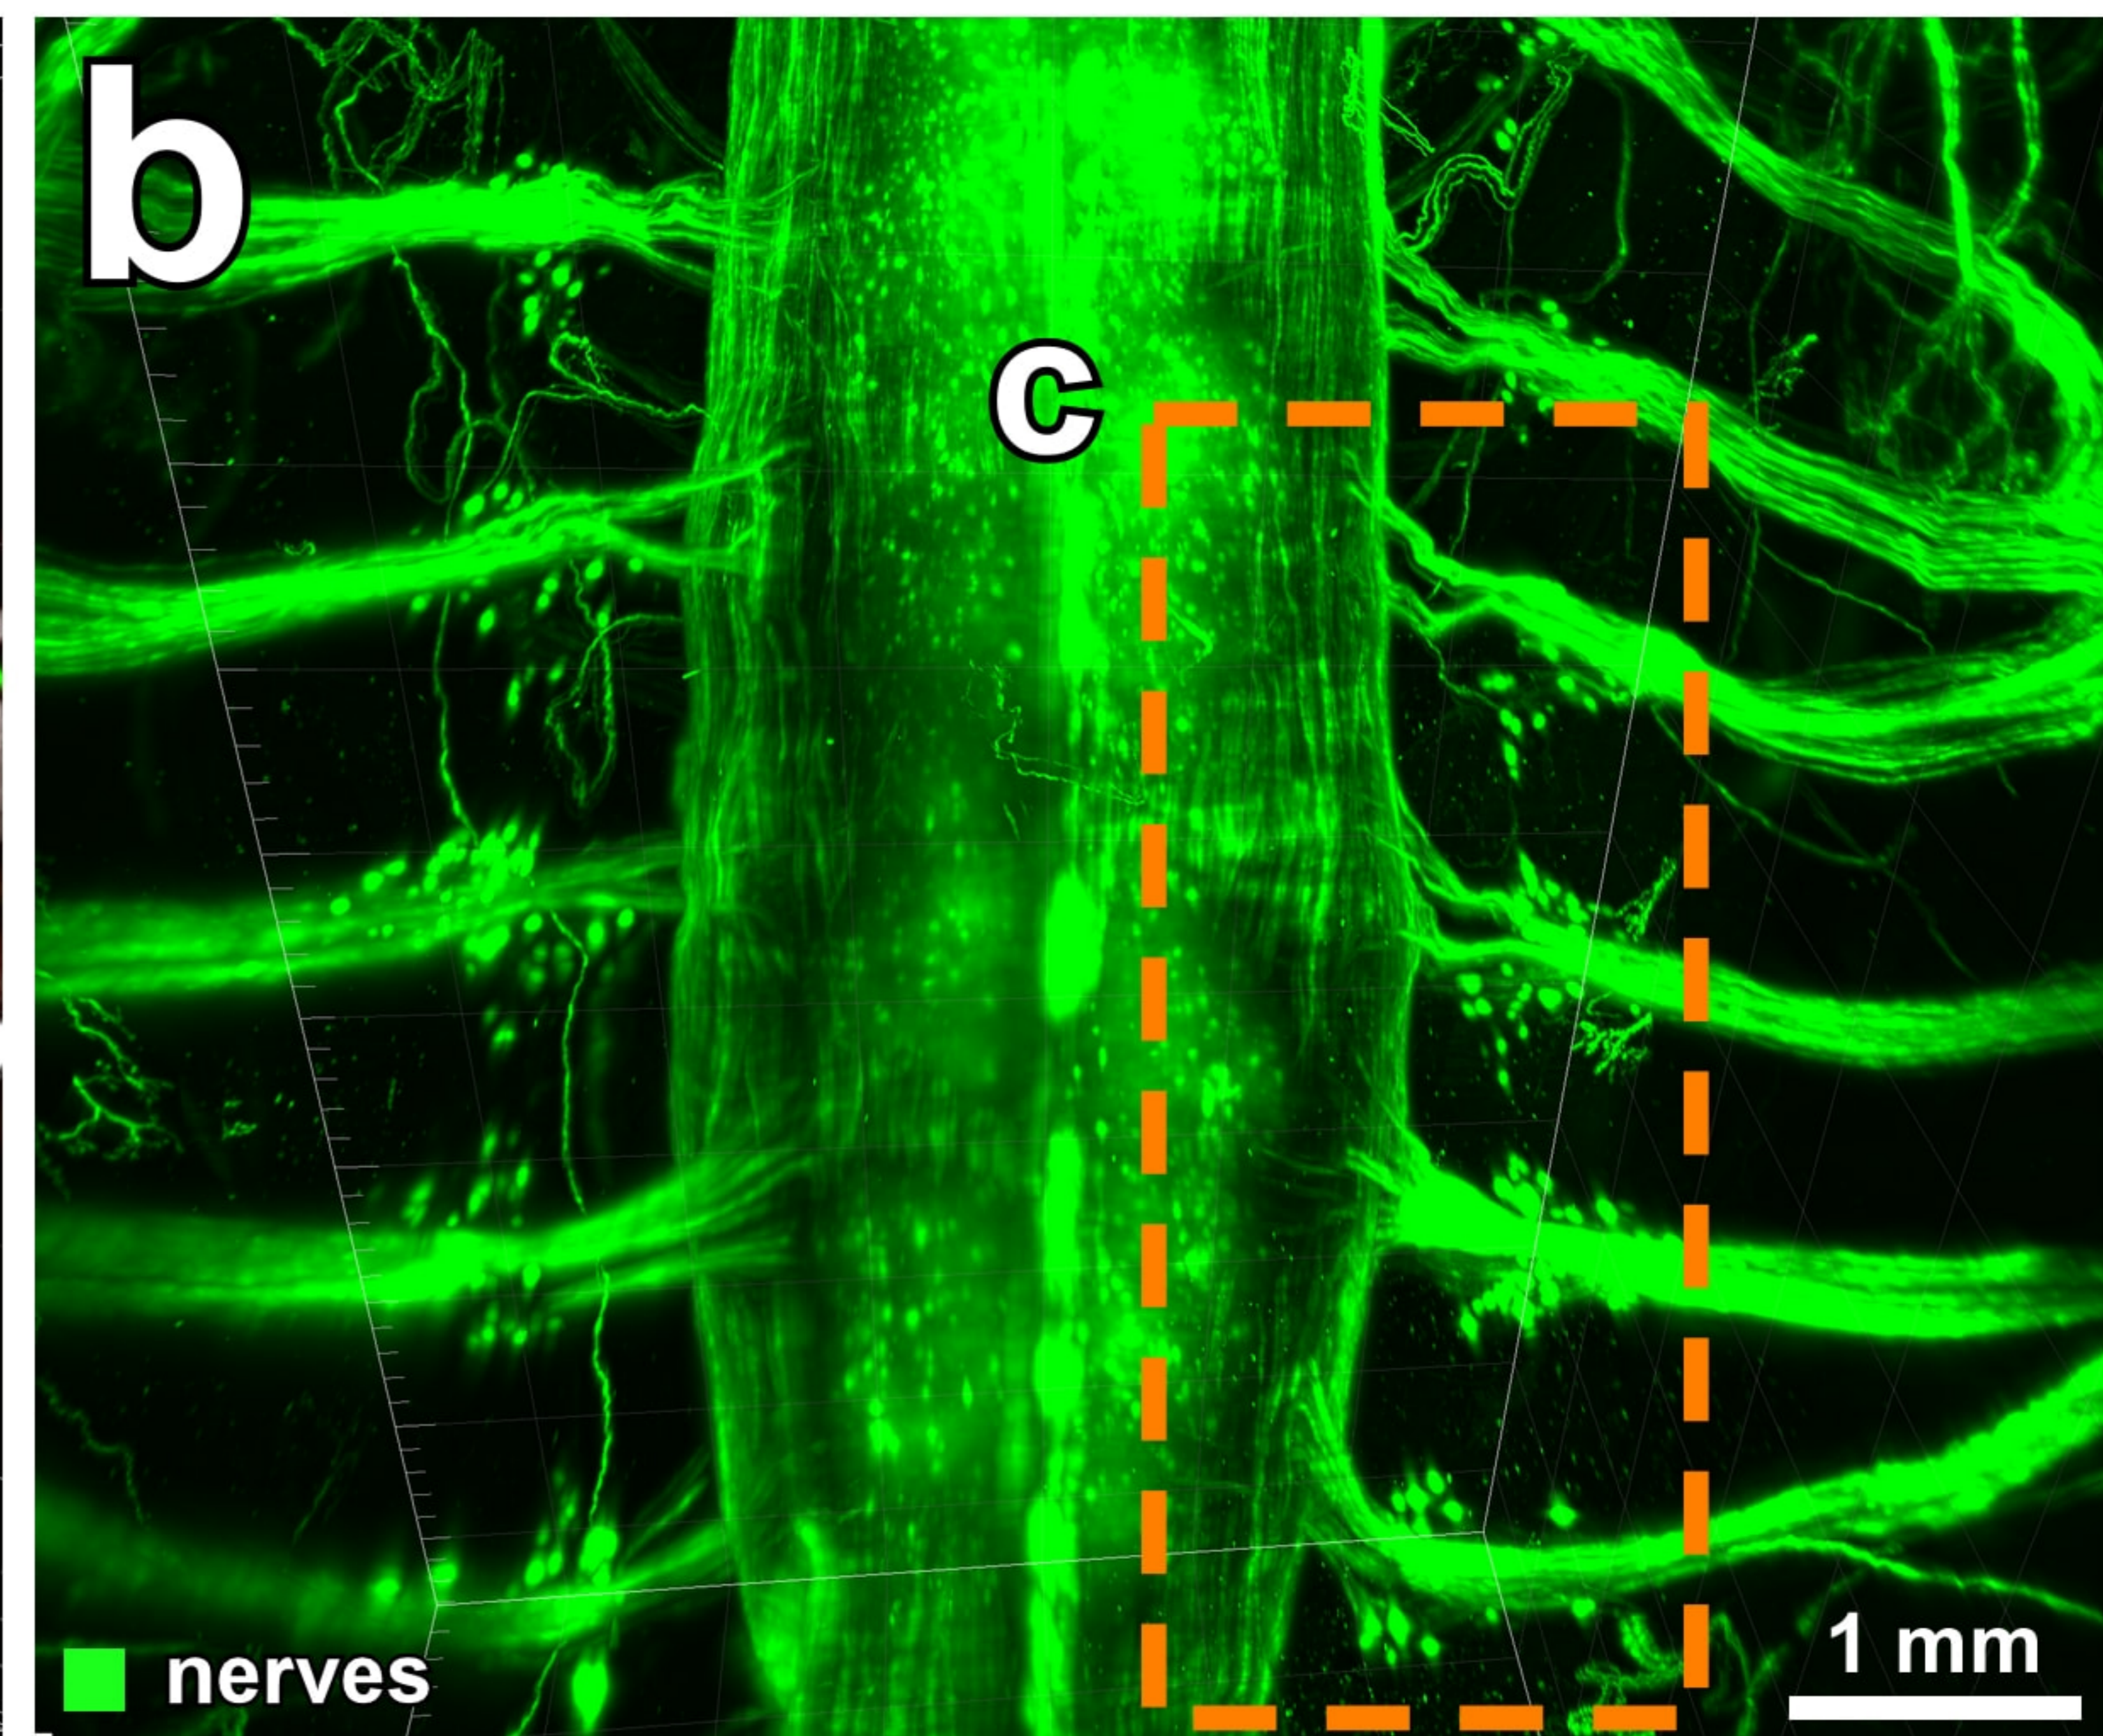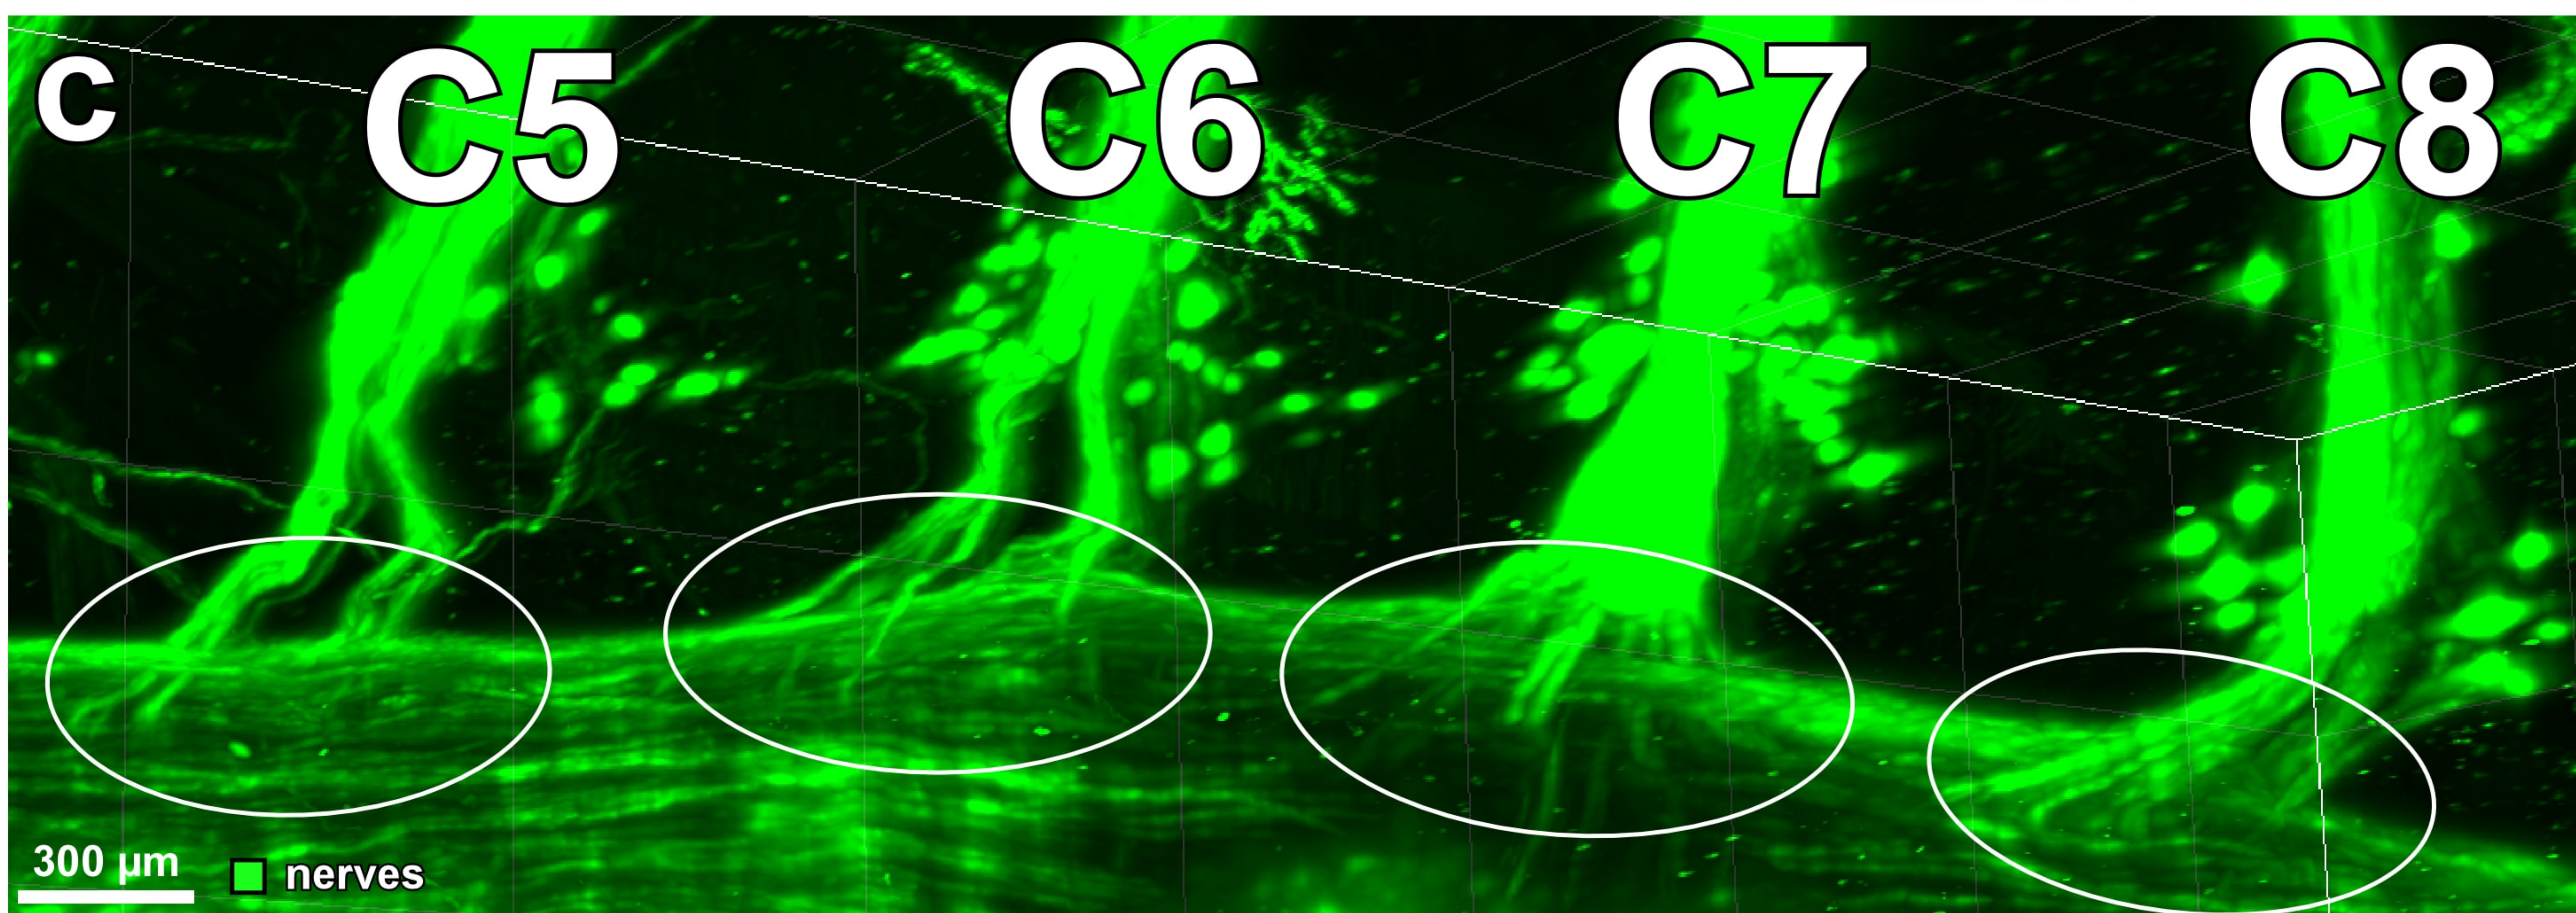

## Supplementary Figure 16

### Upper torso and individual spinal cord roots

(a) Panoptic imaging of the upper torso of the 6 weeks old transparent mouse showing individual spinal cord roots. The bones and organs are in white, mostly the muscles are visible in autofluorescence channel and displayed in red, and the nerves are in green. (b) High magnification view from the region indicated in a showing only nerve signal (ventral roots). (c) High magnification view from the region indicated in b demonstrating non-overlapping entry of axons in C5-C8 ventral spinal cord segments (white circles). Comparable labeling and imaging results were achieved in 5 independent animals.



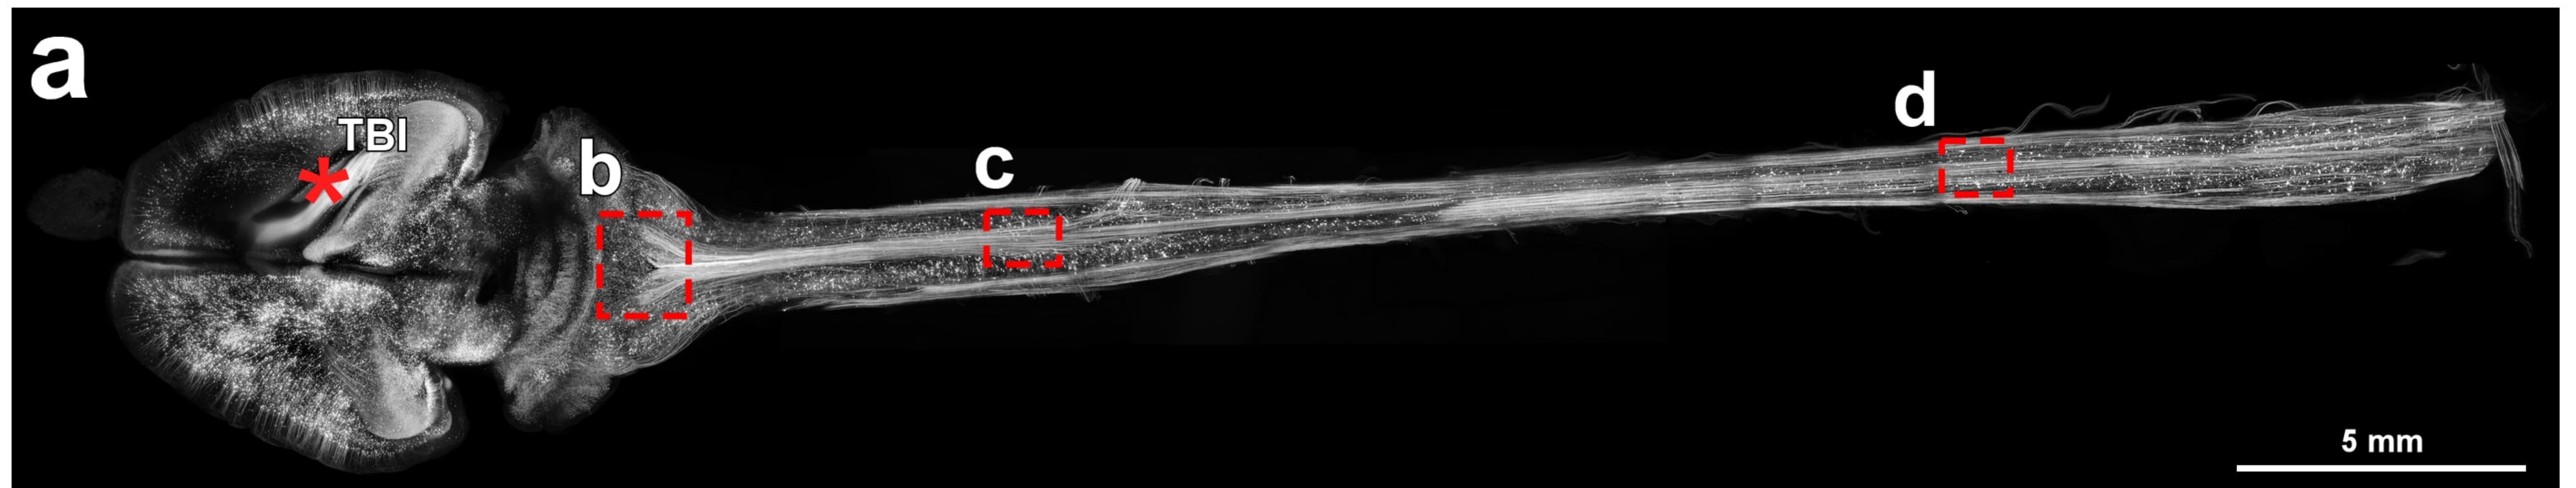

lesioned

unlesioned ctrl

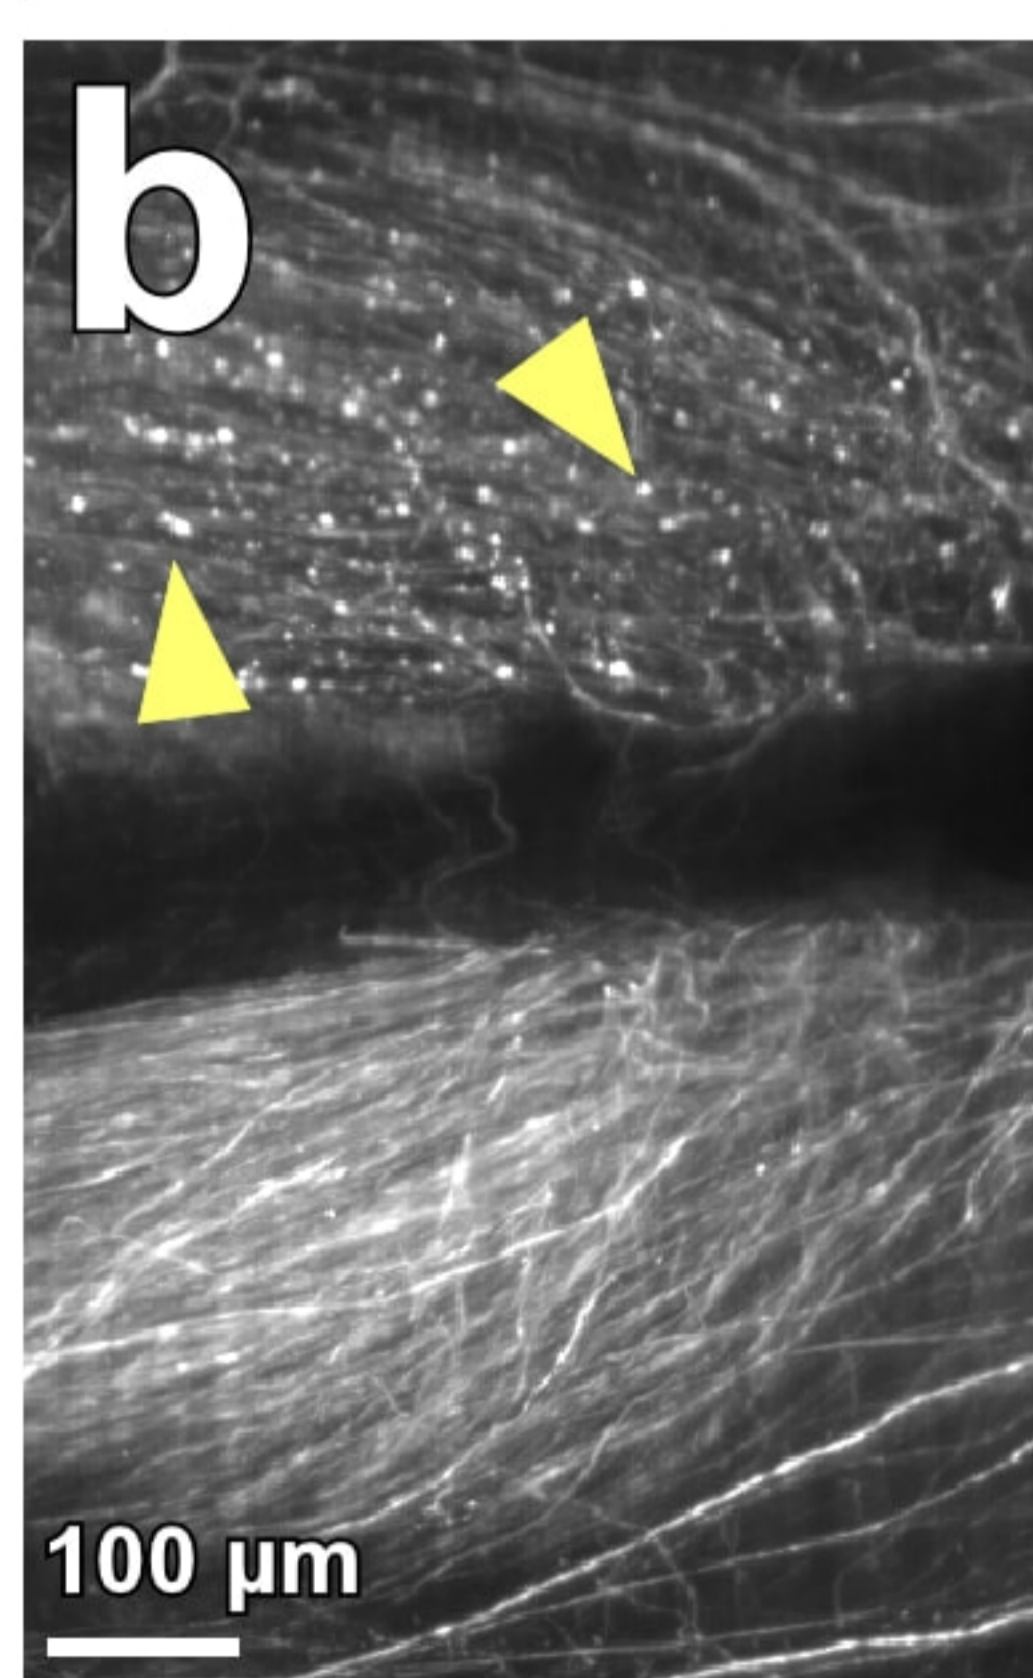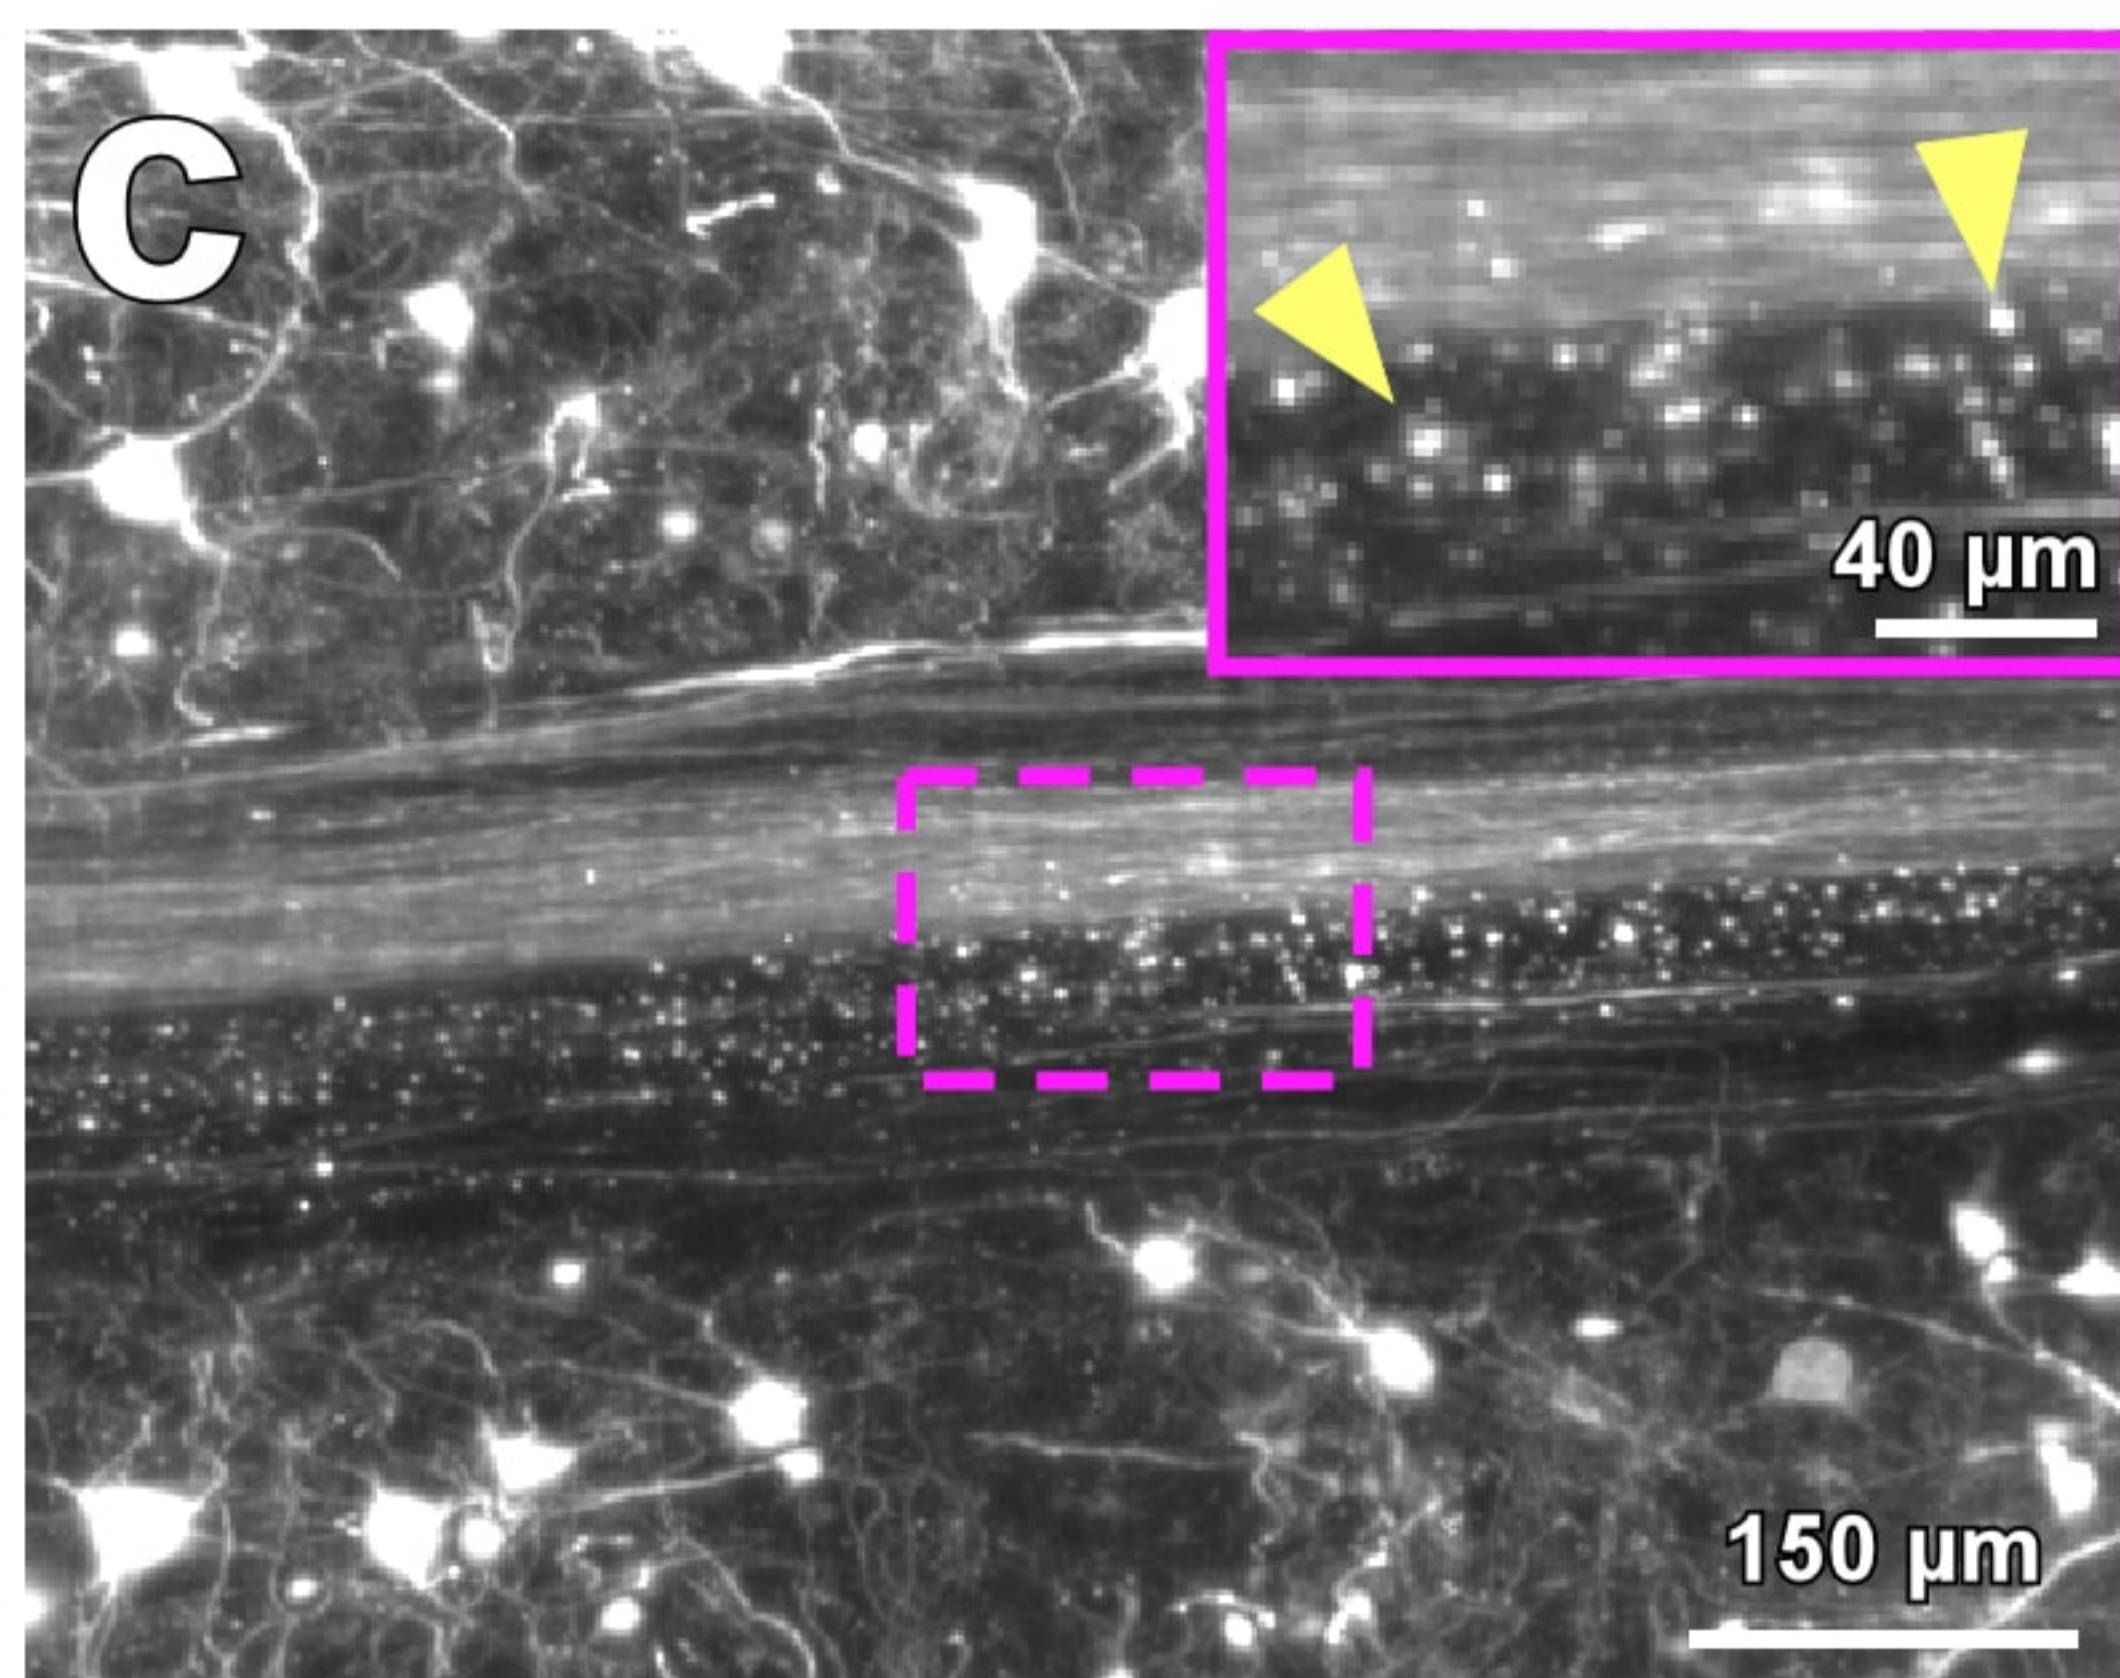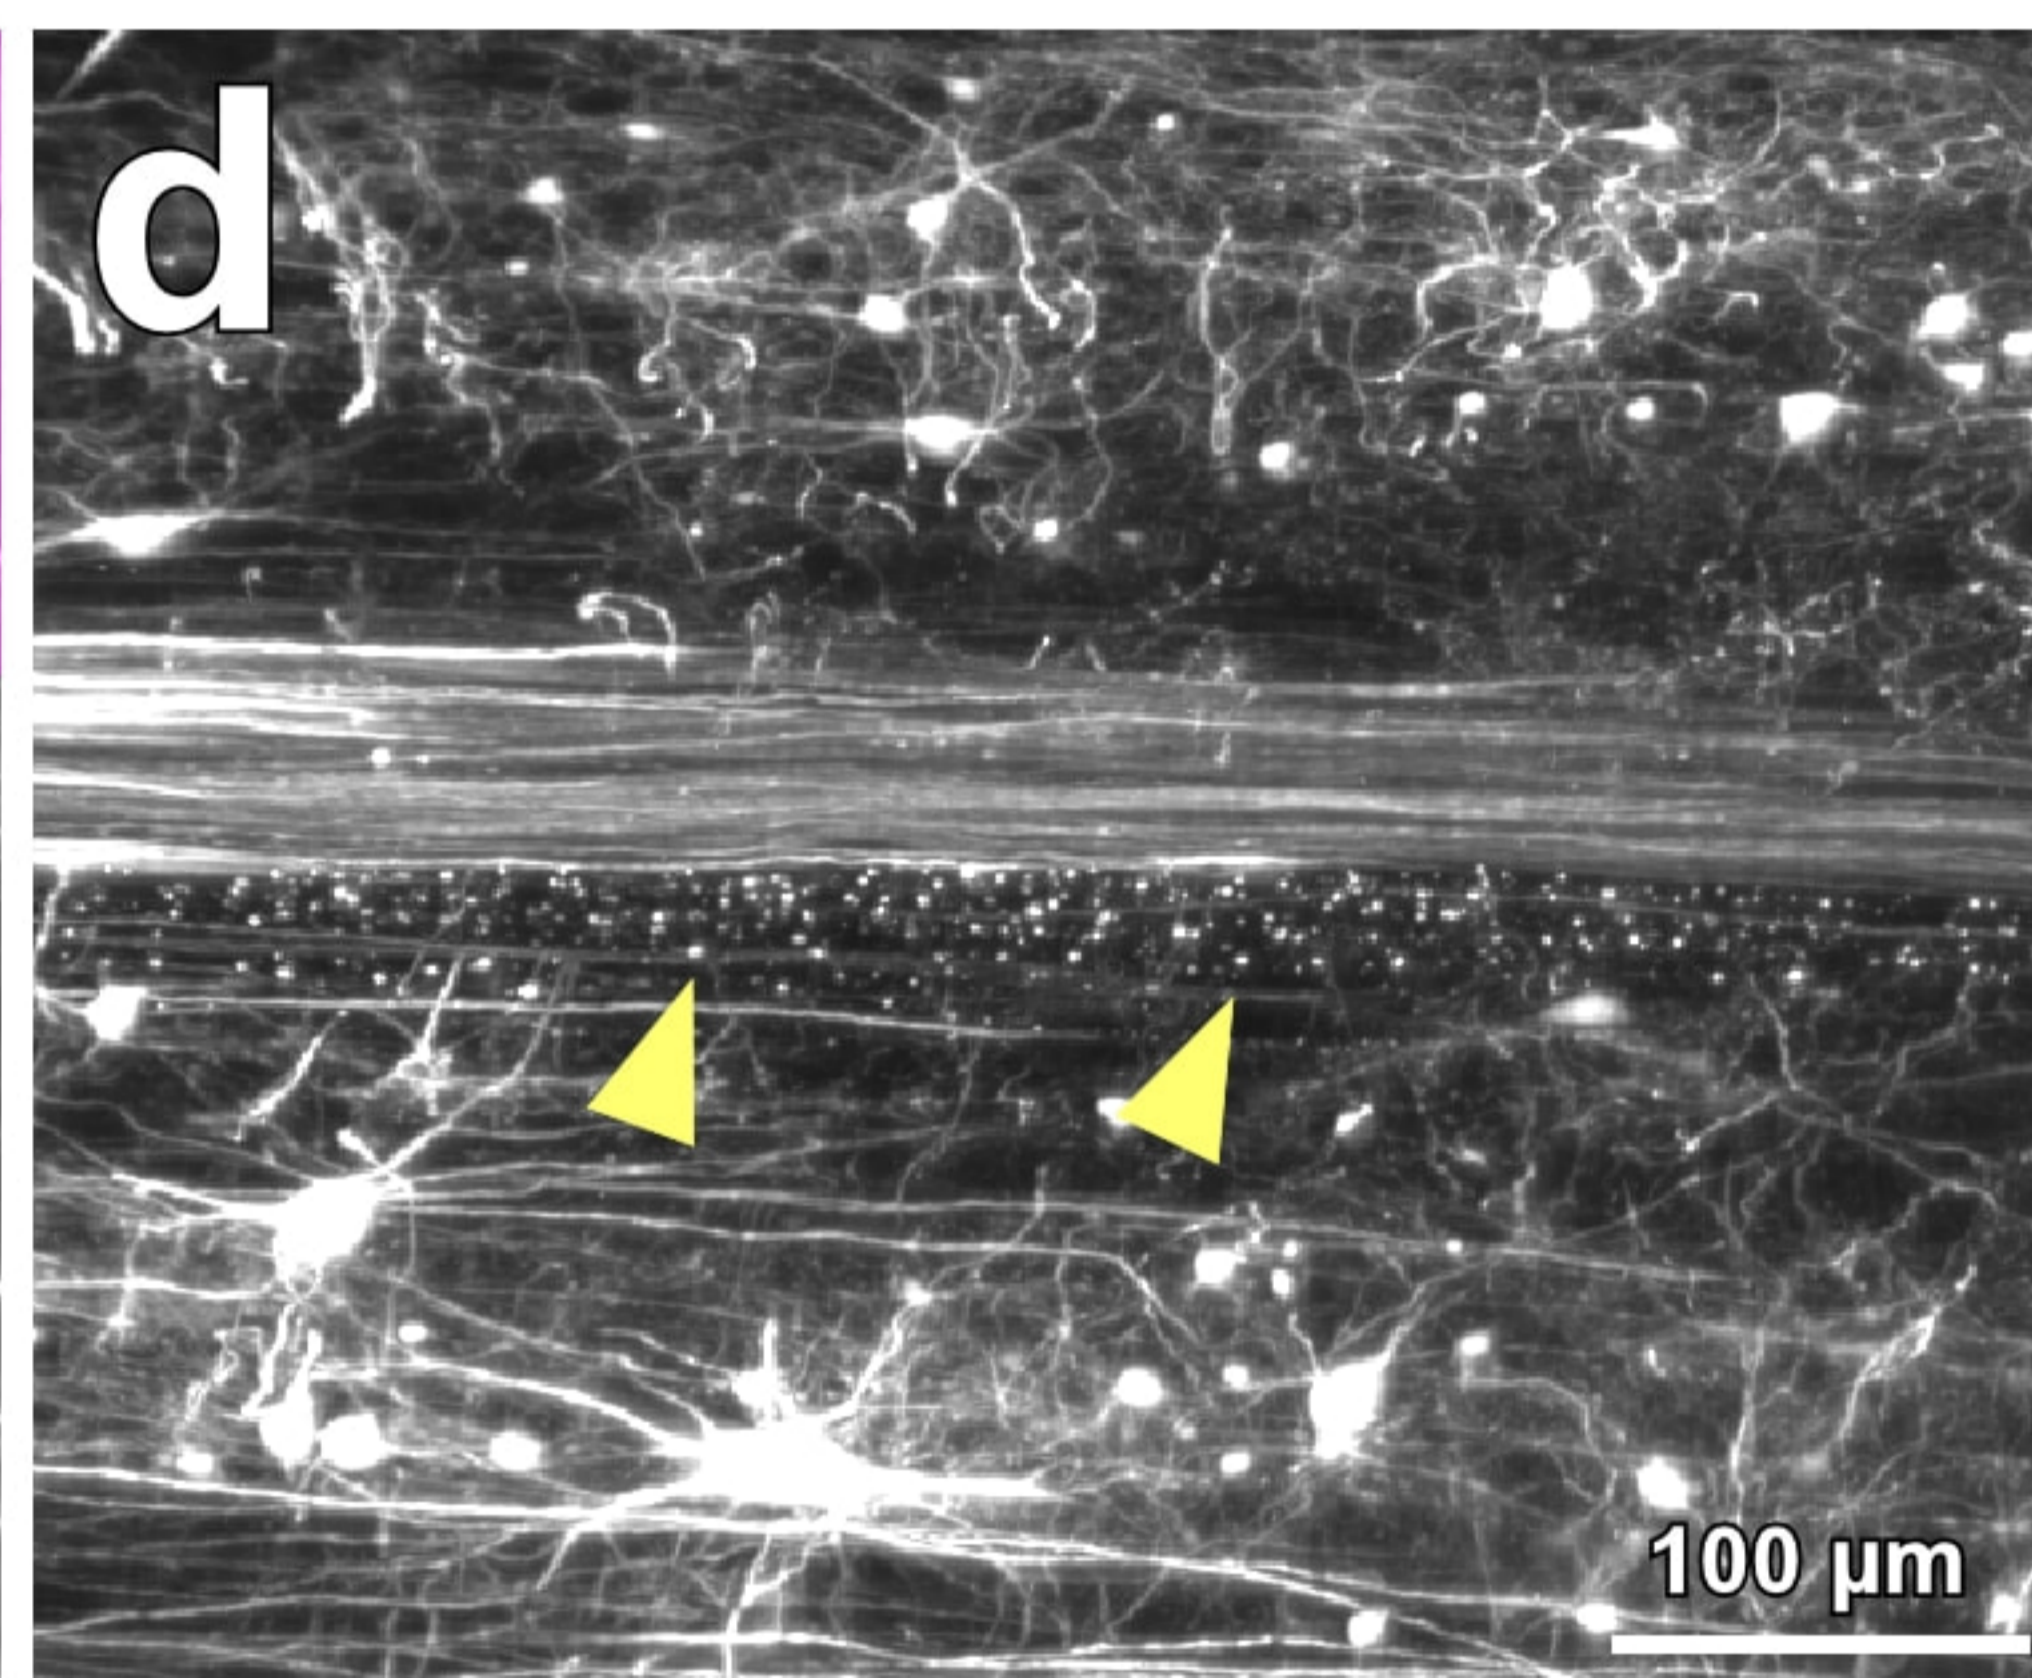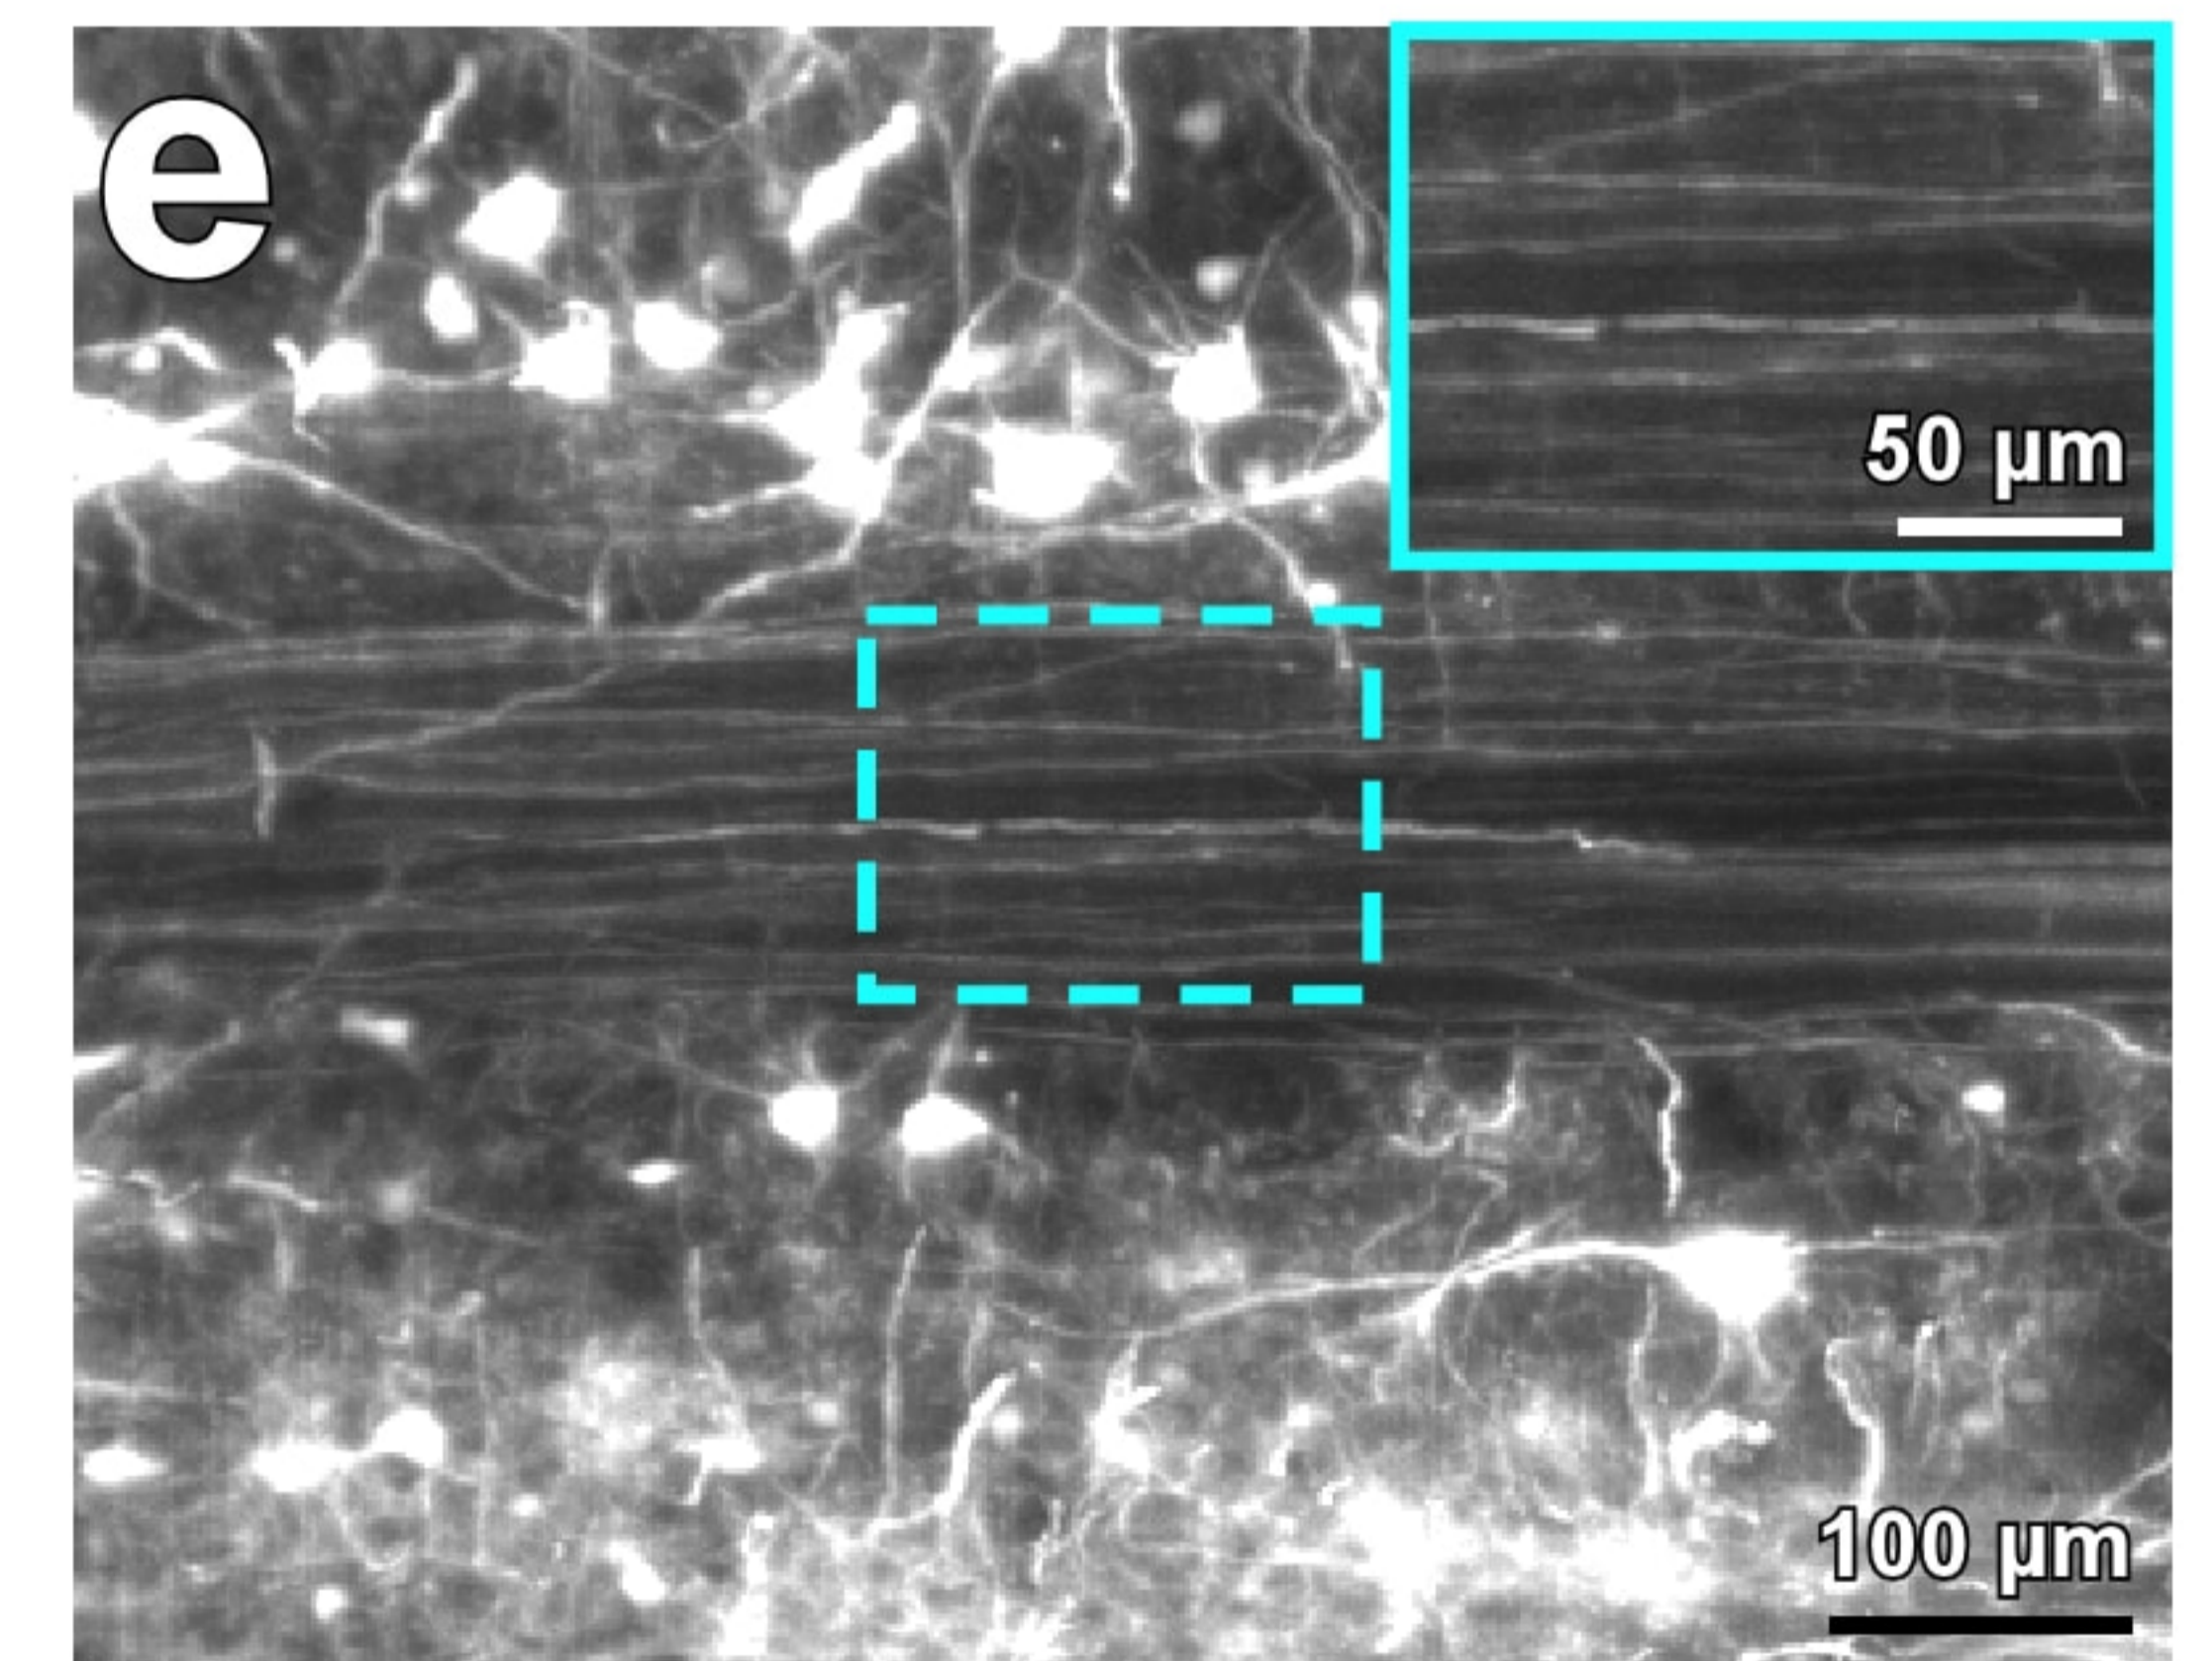

## Supplementary Figure 17

### TBI induces the degeneration of descending motor axons in the central nervous system

(a) To investigate a potential degeneration of the descending motor axons upon TBI, we applied vDISCO on the intact CNS (brain and spinal cord) from *Thy1-GFPM* mice already 1 week after TBI. (b-d) High magnification images coming from the indicated spinal cord regions marked in a. The fragmentation (yellow arrow-heads) of the descending motor axons ipsilaterally in the brainstem before the decussation (b), and contra-laterally after decussation is evident throughout the spinal cord (c,d). (e) An unlesioned spinal cord view at the same region shown in the lesioned animal in d. Similar results were observed from 2 independent animals.



merge Prox1/PI

Prox1

PI

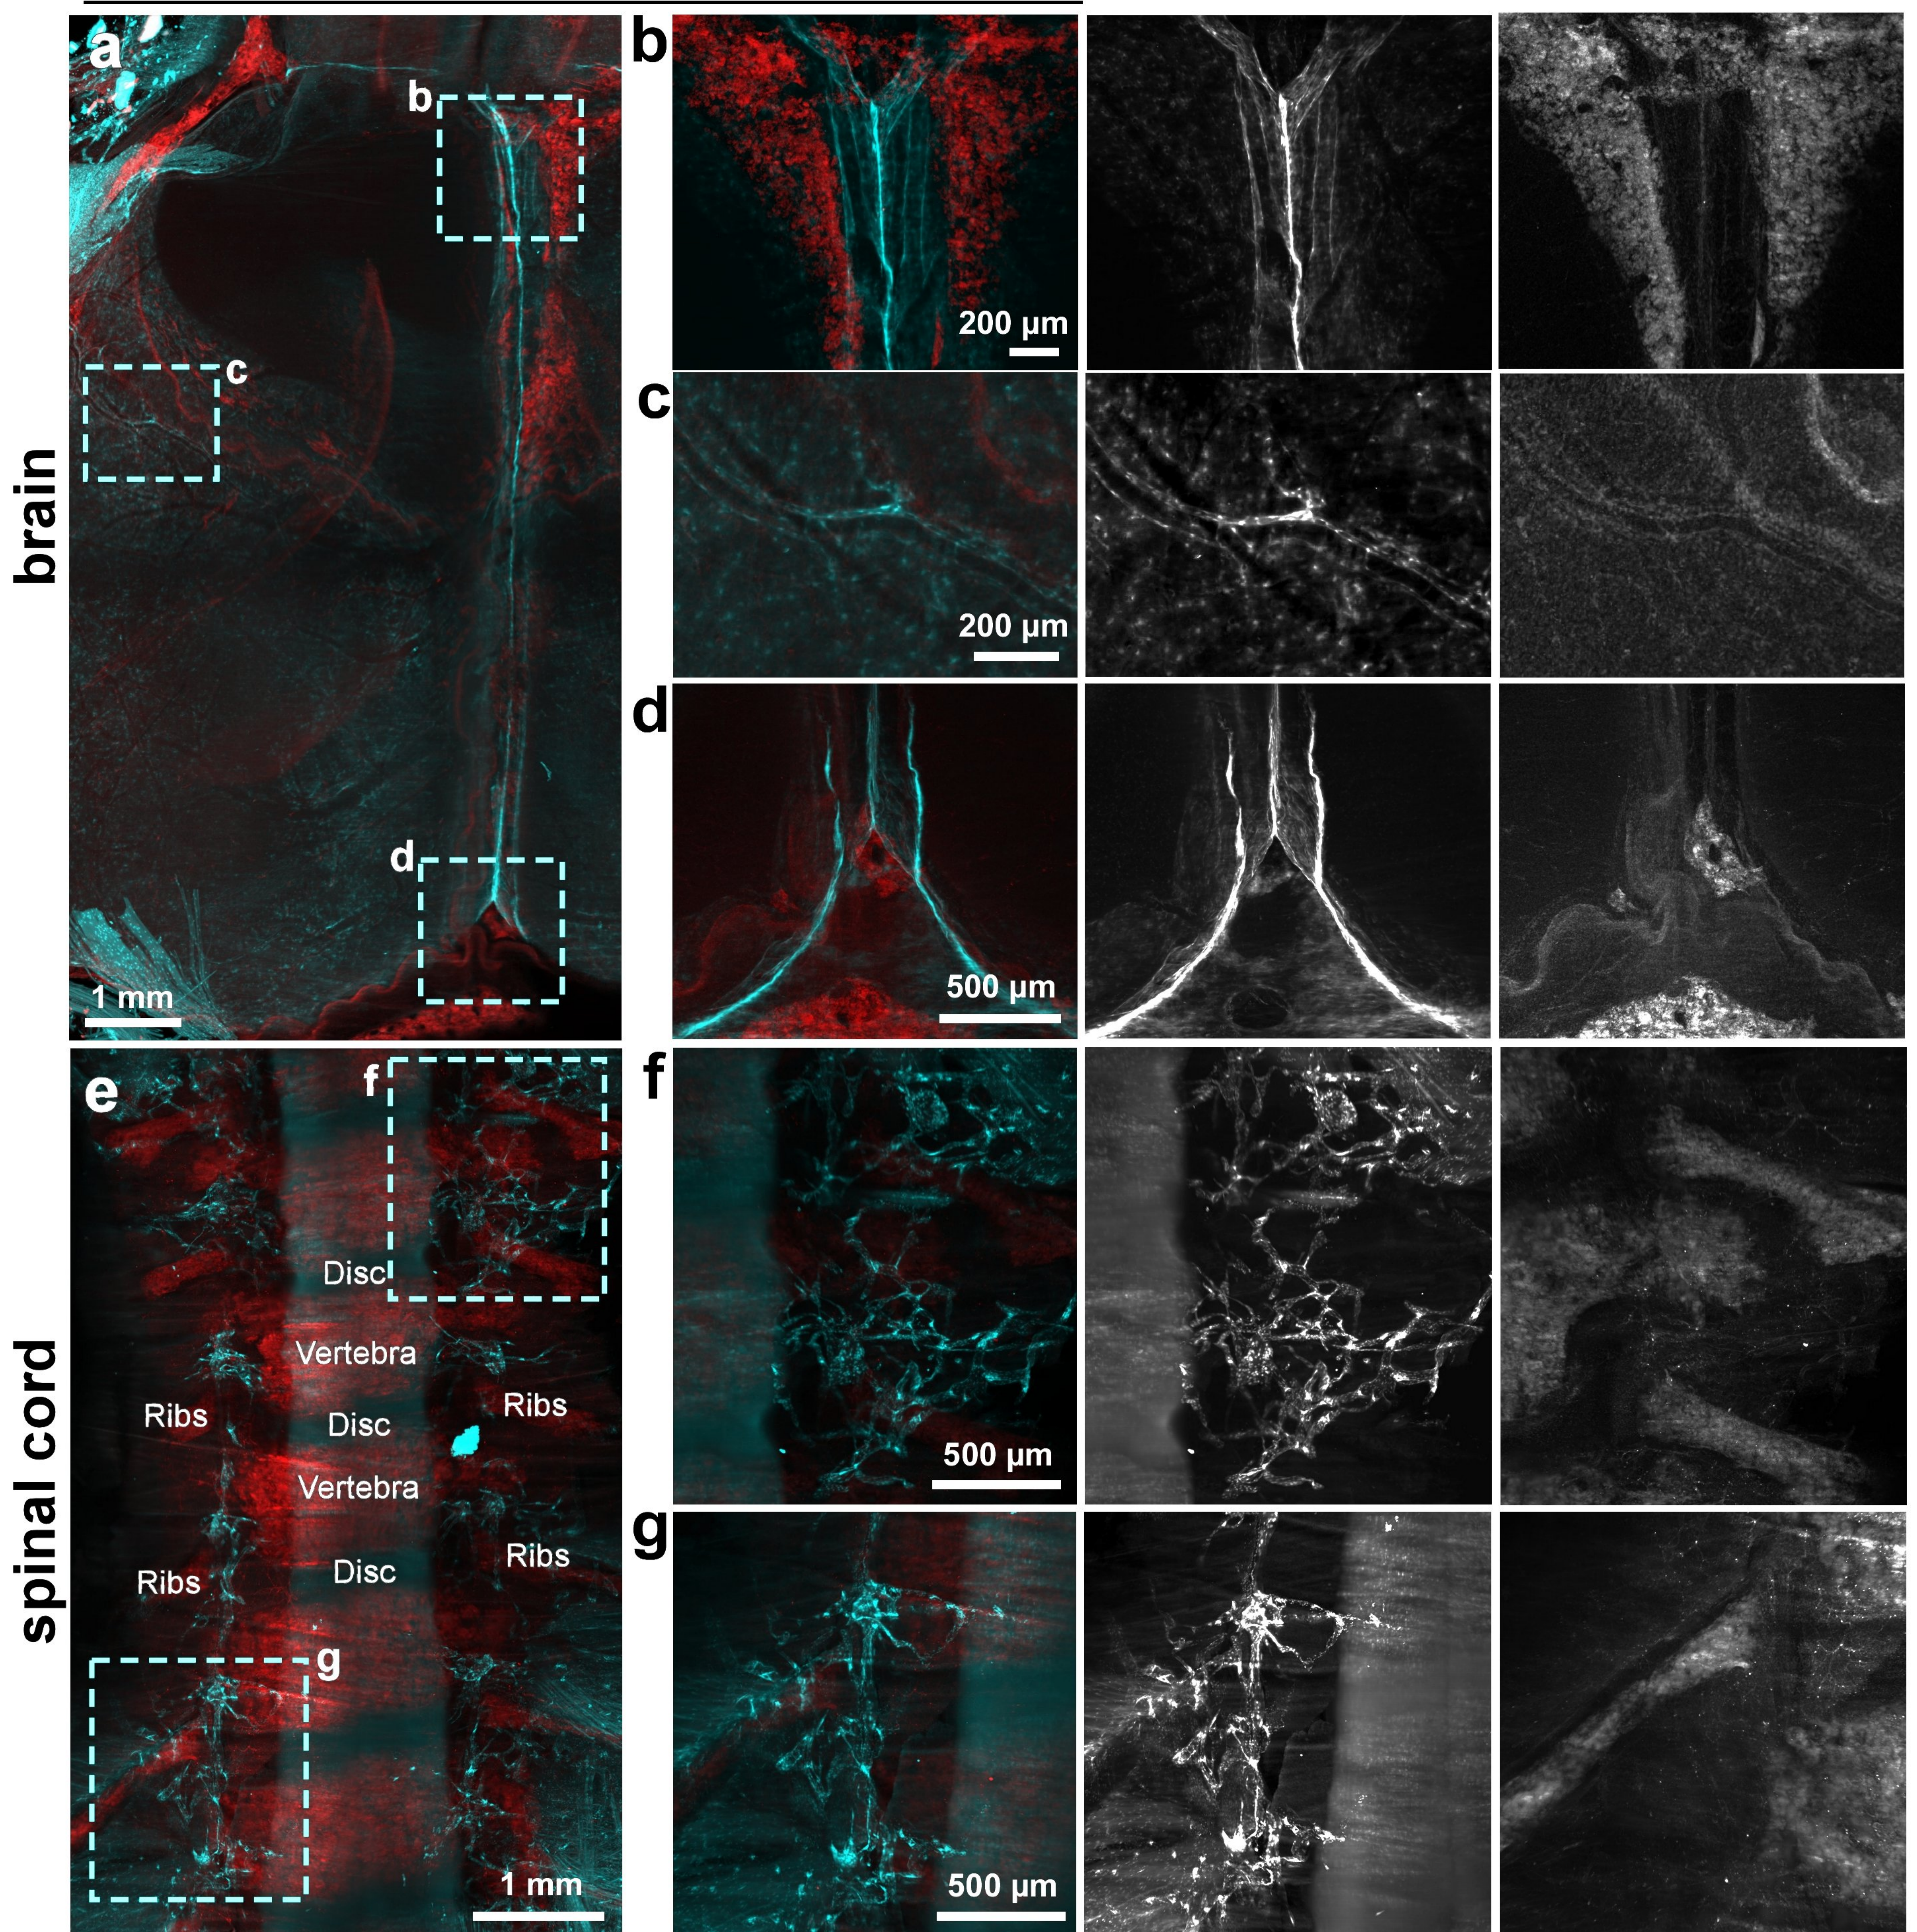

## Supplementary Figure 18

### Meningeal lymphatic vessels through transparent skull and vertebra by vDISCO

After applying vDISCO pipeline, the 4 weeks old *Prox1*-EGFP mouse was imaged with light-sheet microscopy. Prox1 and PI channels are shown in merge and separate views. (a-d) *Prox1*-EGFP mouse head showing the brain lymphatic vessels (cyan) along the sagittal sinus (b), pterygopalatine artery (c) and transverse sinus (d) (similar results were observed from 5 independent mice). (e-g) Images from the thoracic region of the spine show the lymphatic vessels (cyan) in the spine region (single experiment).



merge **Prox1/PI****Prox1****PI**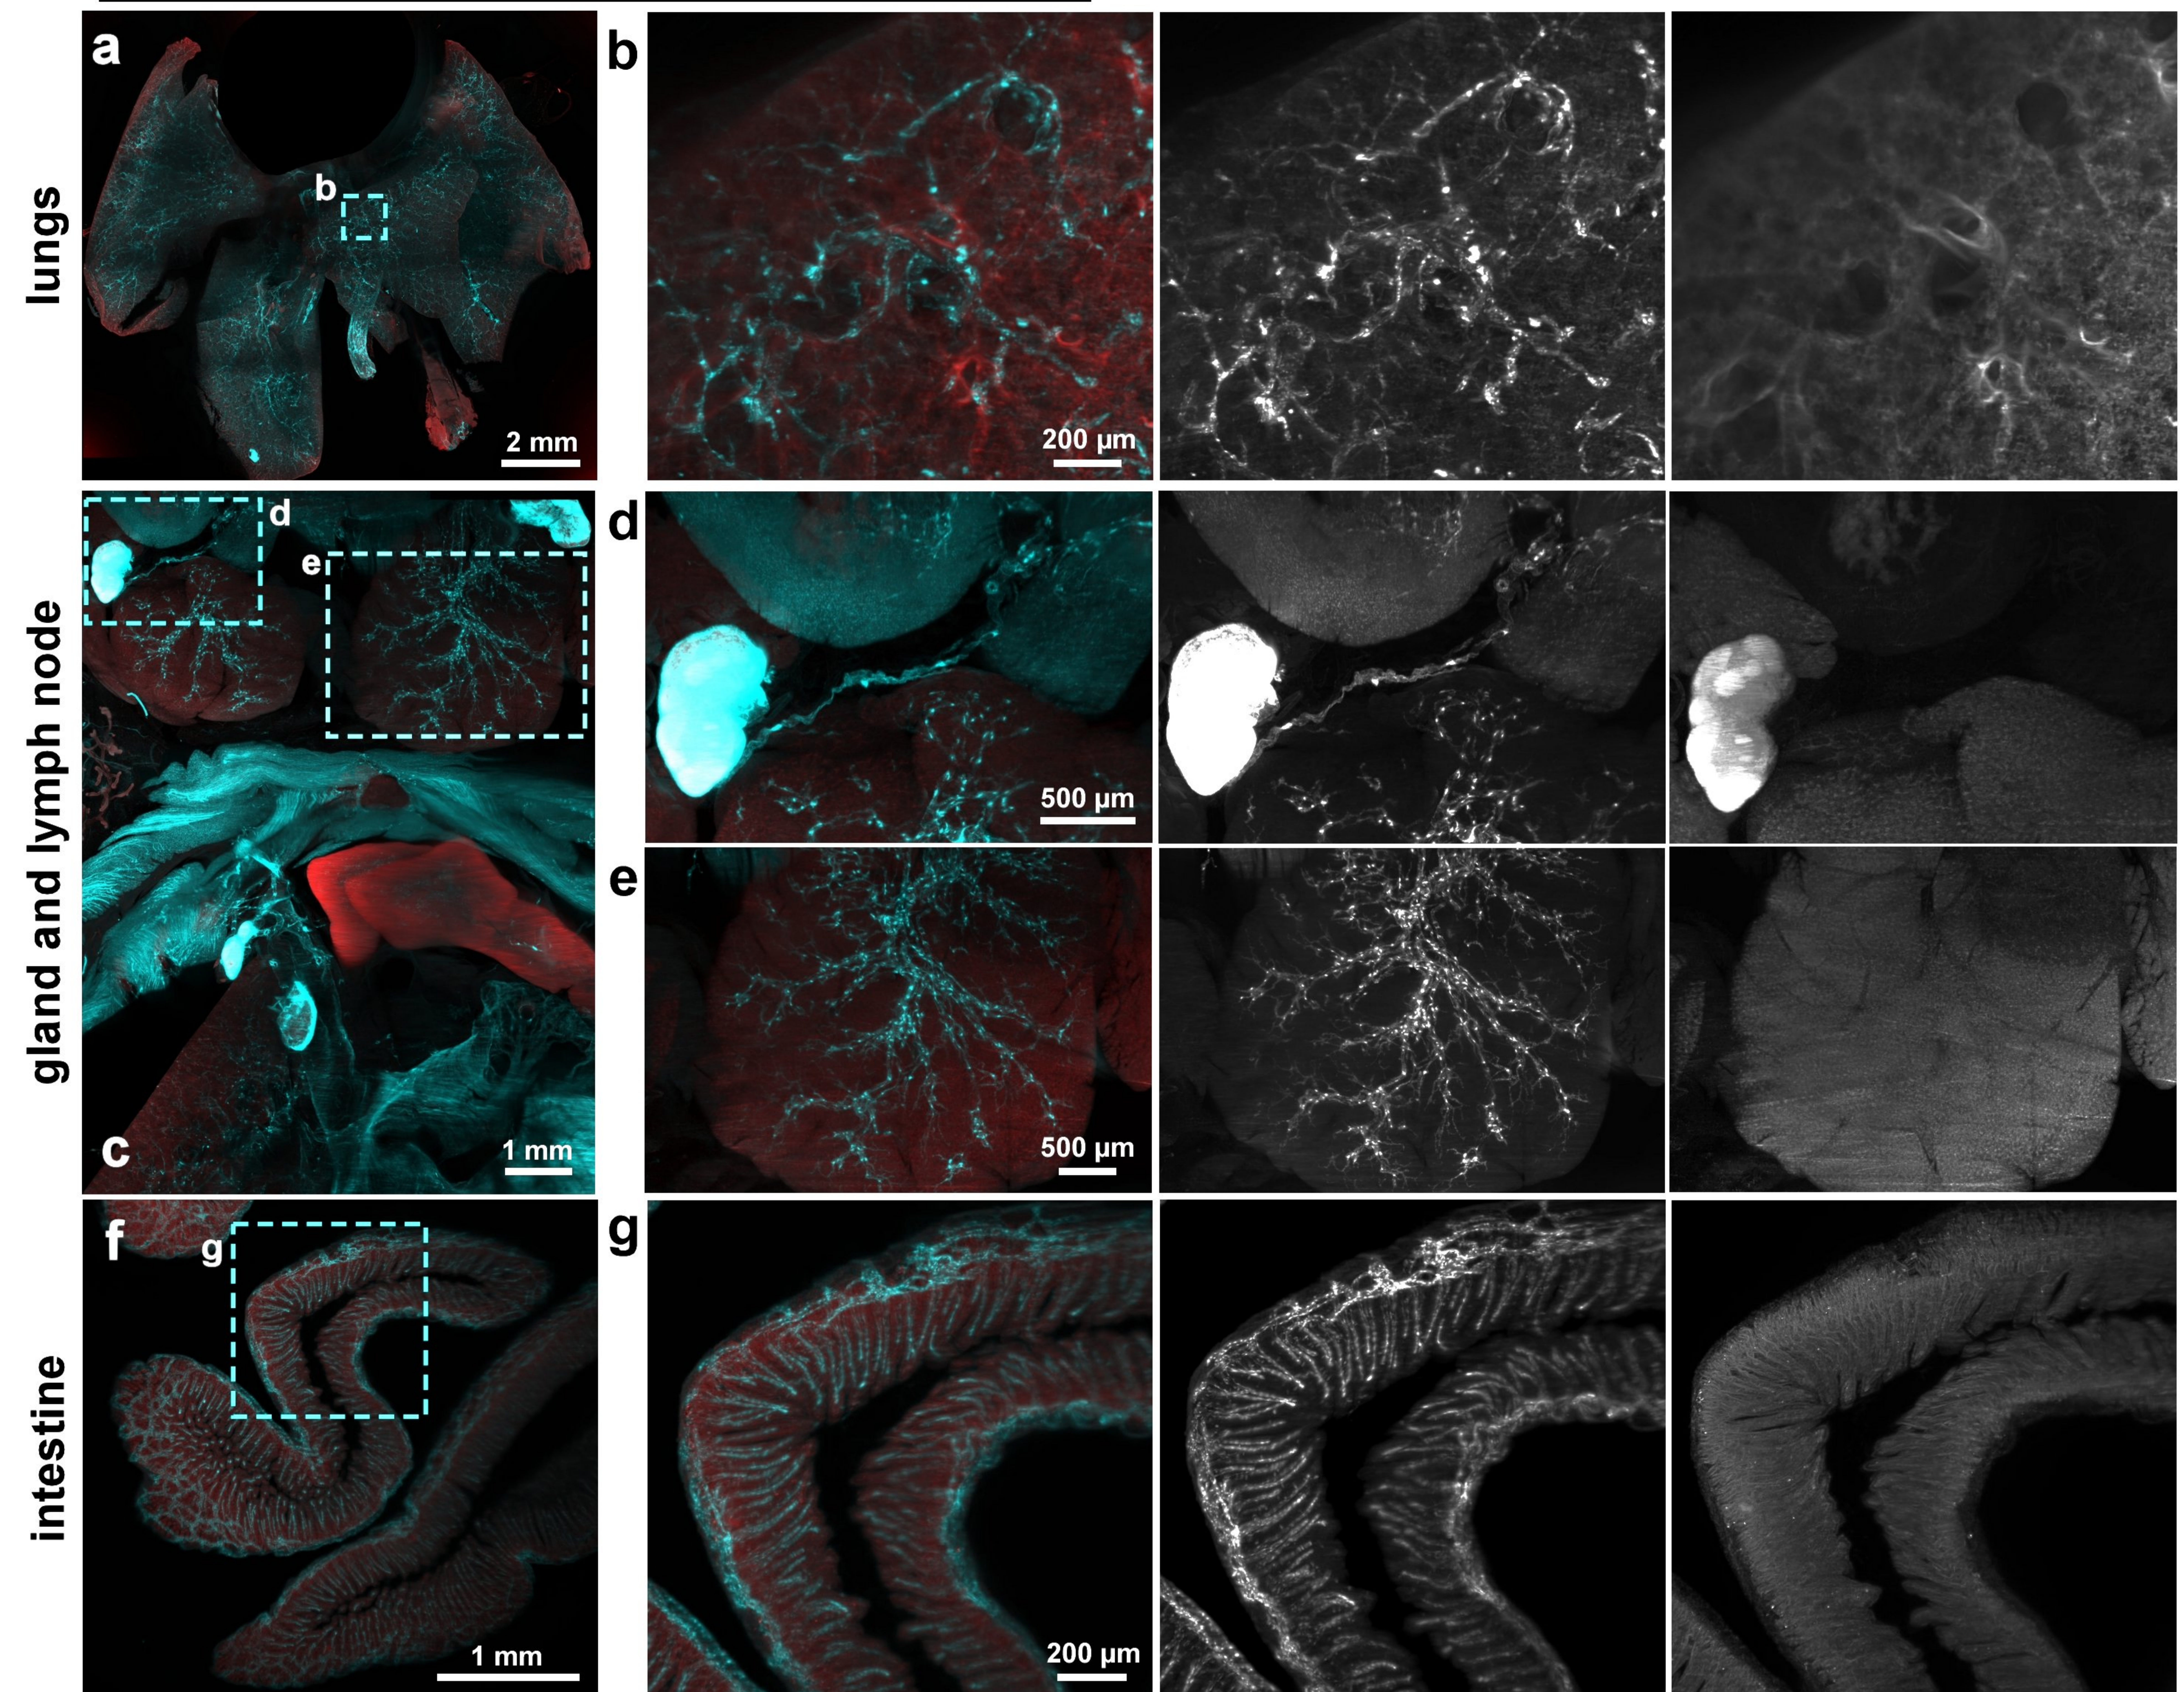

## Supplementary Figure 19

### Lymphatic vessels in internal organs by vDISCO

After applying vDISCO pipeline, the 4 weeks old *Prox1*-EGFP mouse was imaged with light-sheet microscope (single experiment). *Prox1* and PI channels are shown in merge and separate views. The lymphatic vessels (cyan) in lungs (**a-b**), in cervical lymph node (**c,d**), in salivary gland (**c,e**) and in intestine (**f,g**) are evident. See also Supplementary Video 6.



## brain surface

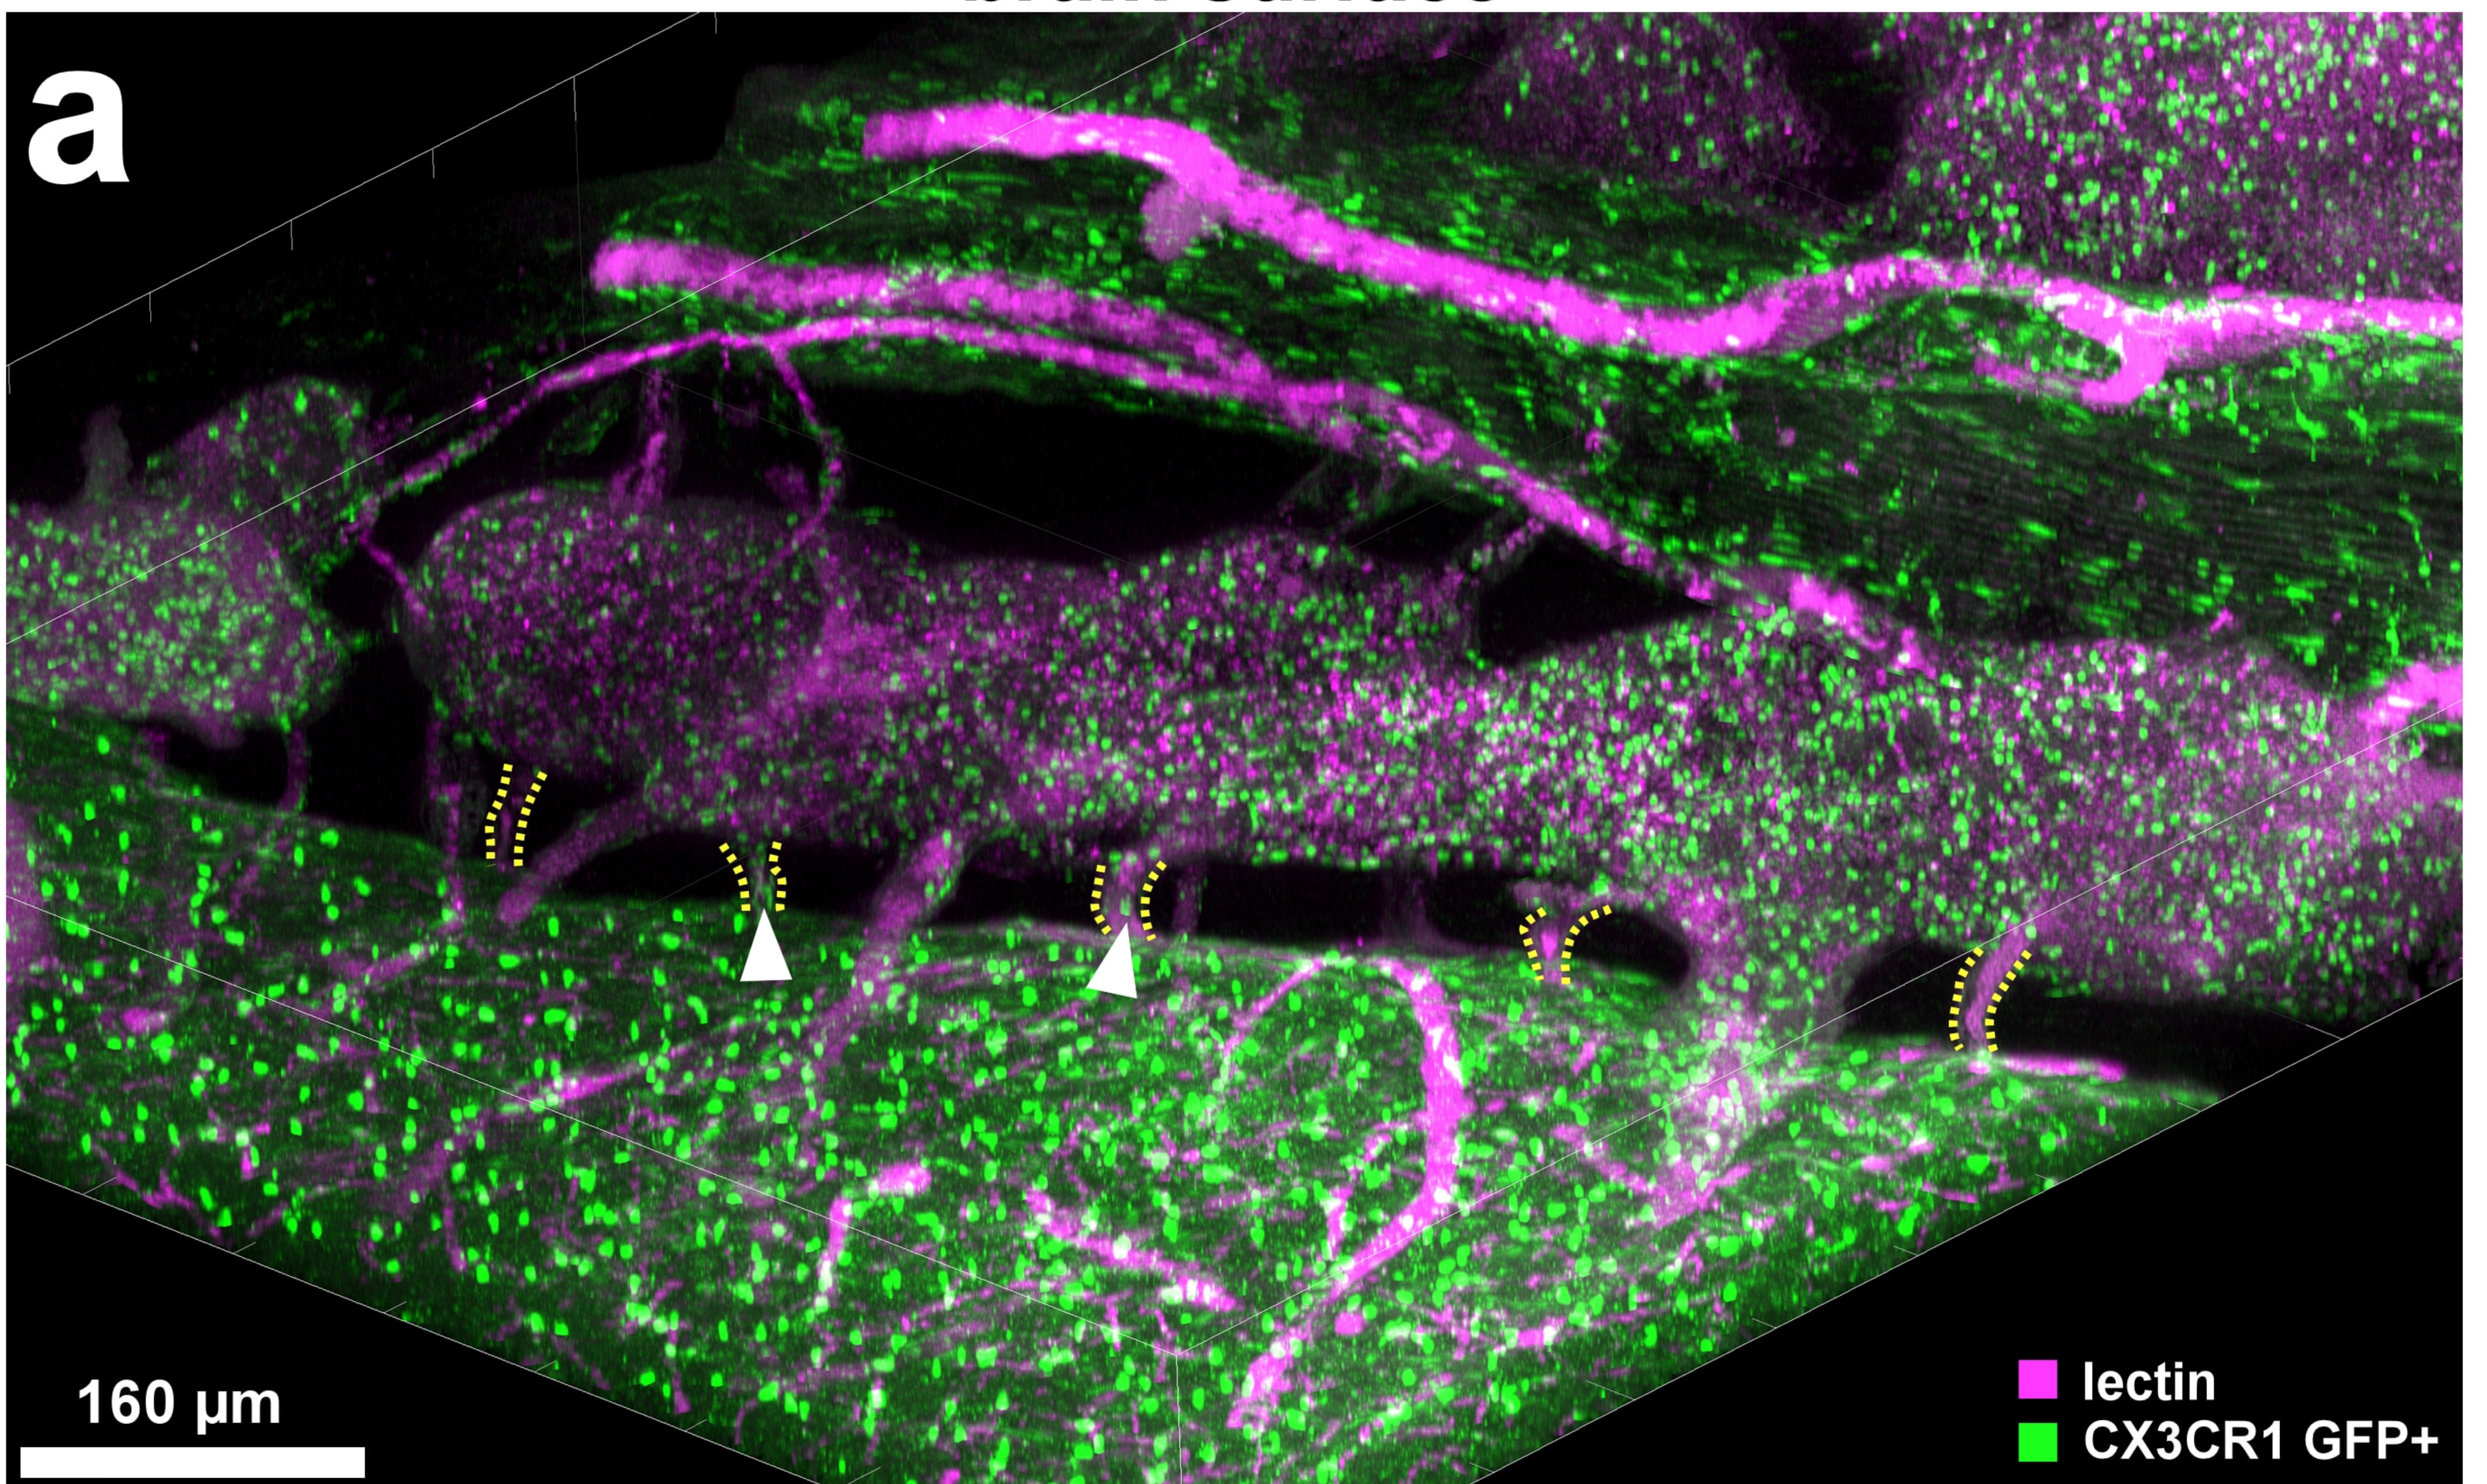

## sagittal sinus

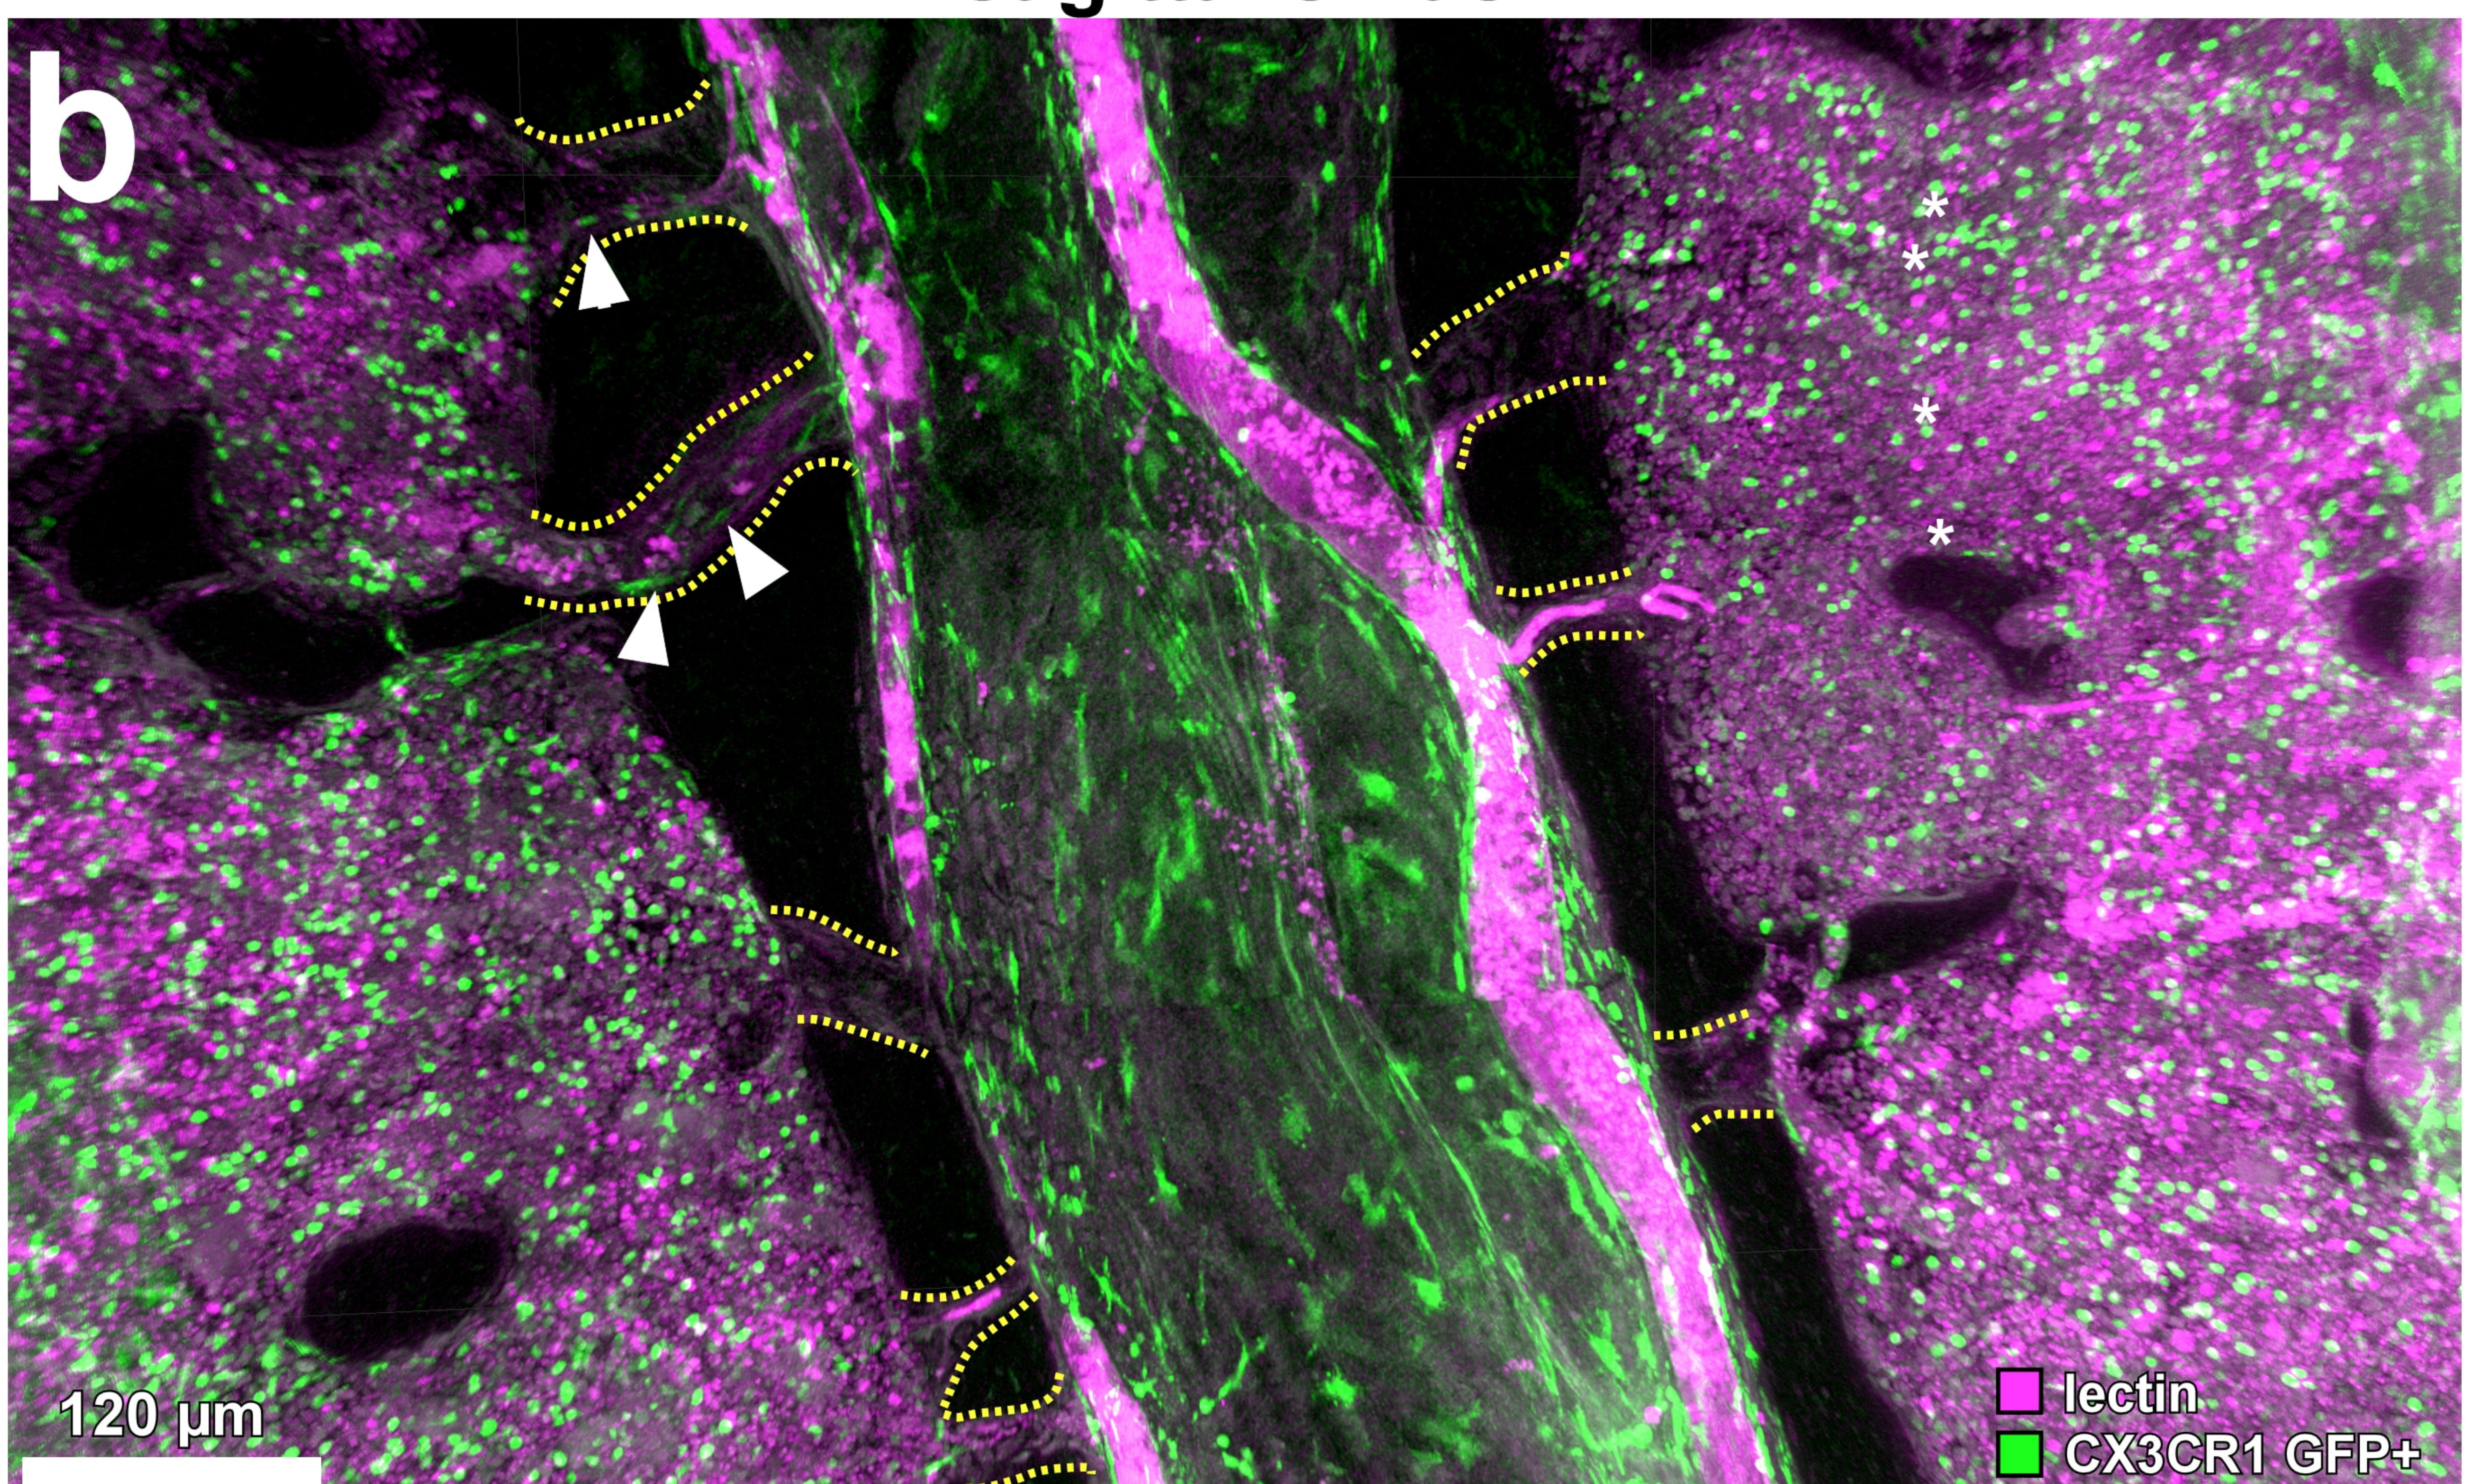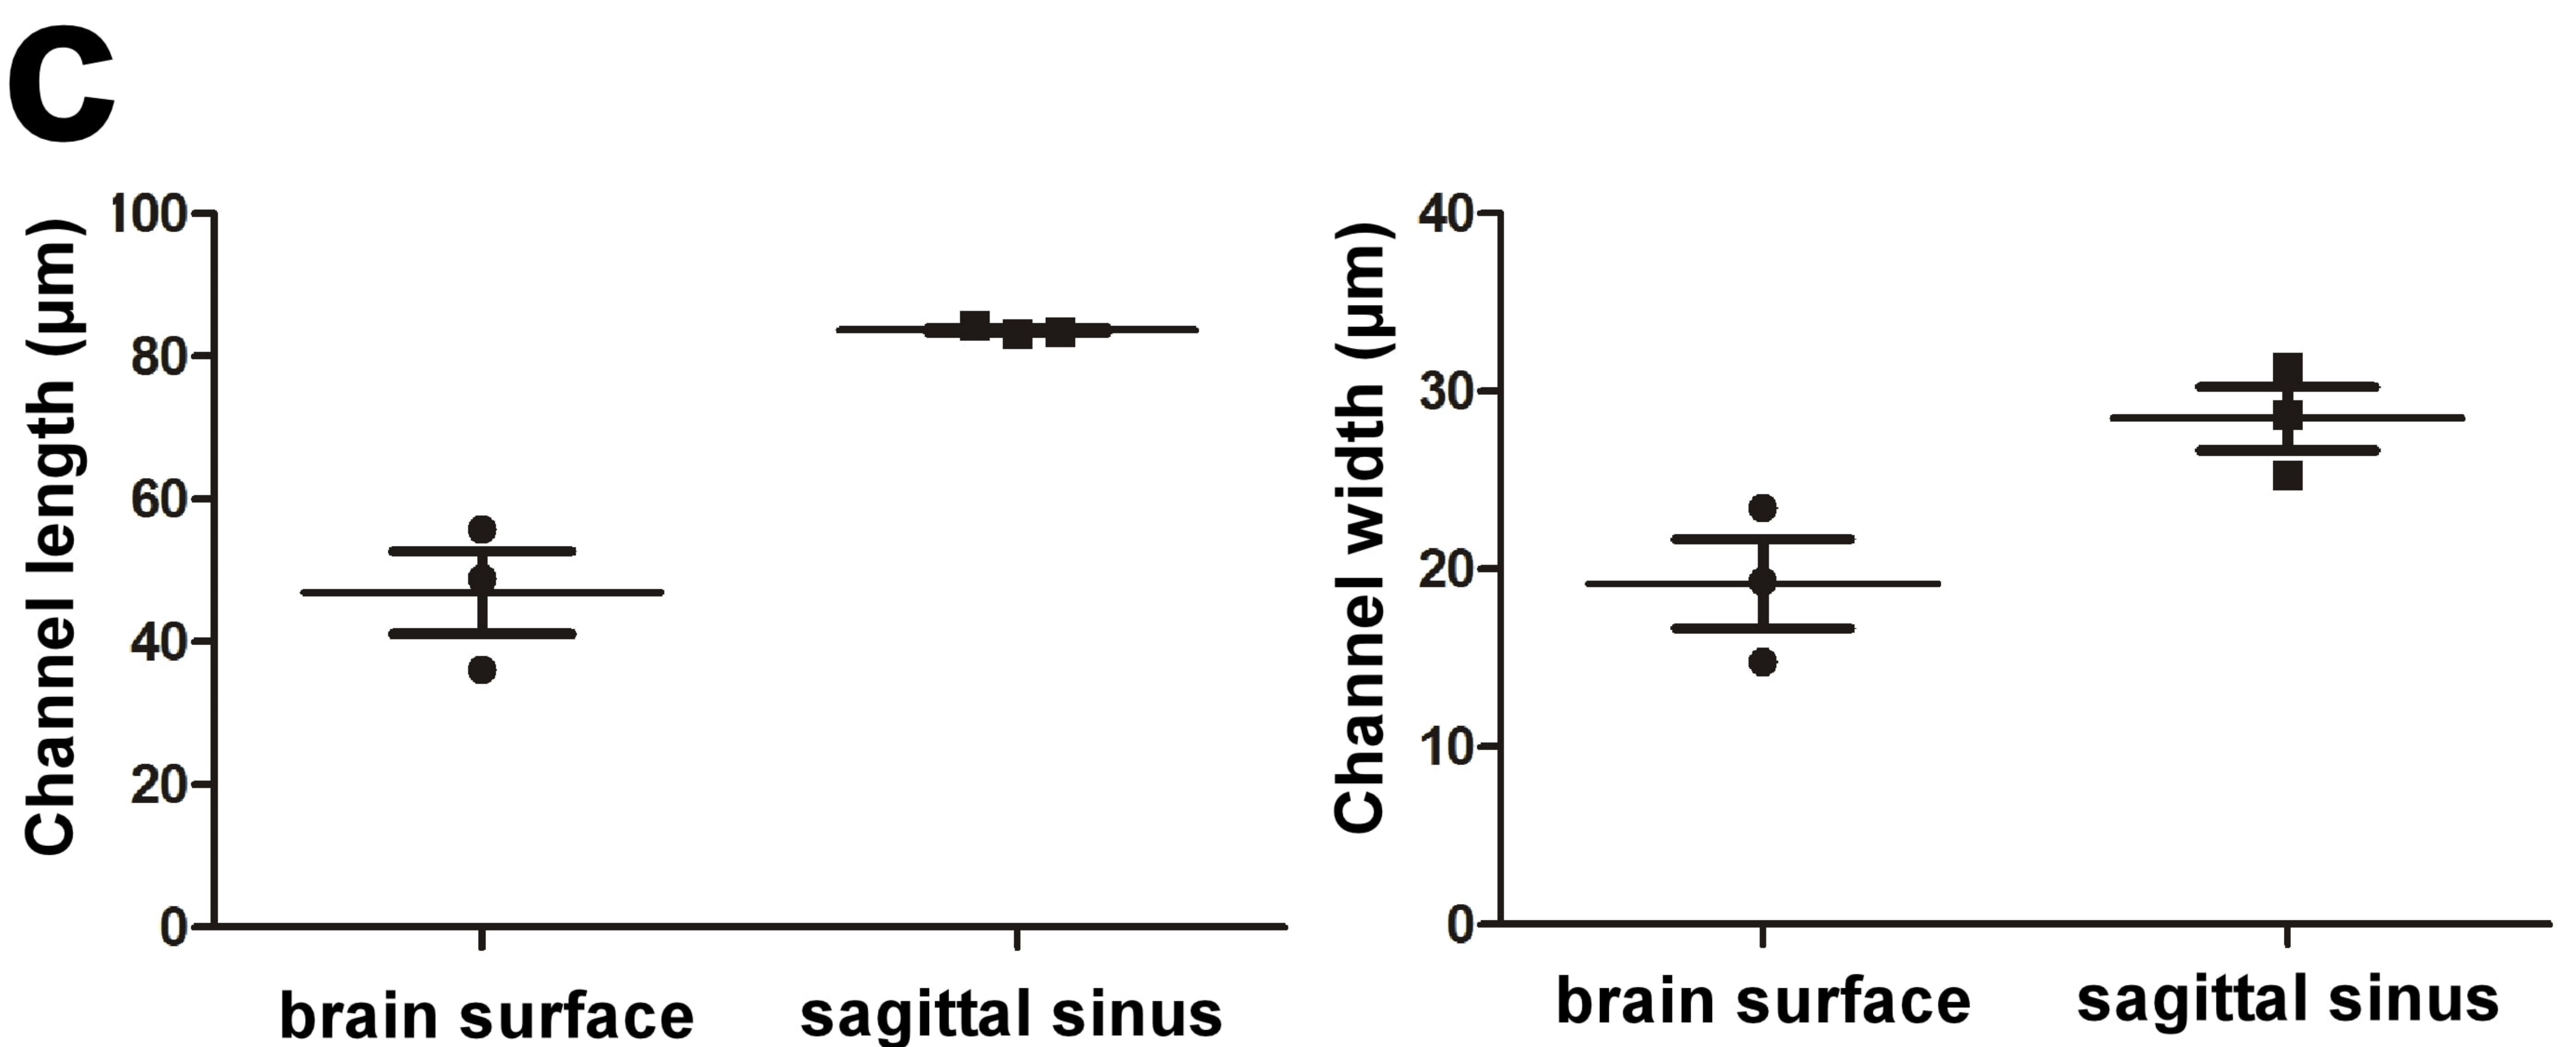

## Supplementary Figure 20

### Structural features of short skull-meninges connections (SMCs)

(a,b) 3D confocal images of brain-skull interface. A 4 months old CX3CR1<sup>GFP/+</sup> mouse (CX3CR1 GFP+ cells in green) was injected with lectin dye (magenta). Vascular connections between the skull marrow and meninges at the brain surface (a) and sagittal sinus (b) are visible, including the CX3CR1 GFP+ cells (white-arrow heads) in the connections (similar results were observed from 3 independent mice). See also Supplementary Video 9. (c) Quantifications of length and width of the SMCs at sagittal sinus and brain surface (mean  $\pm$  SEM; n=3 animals per group).



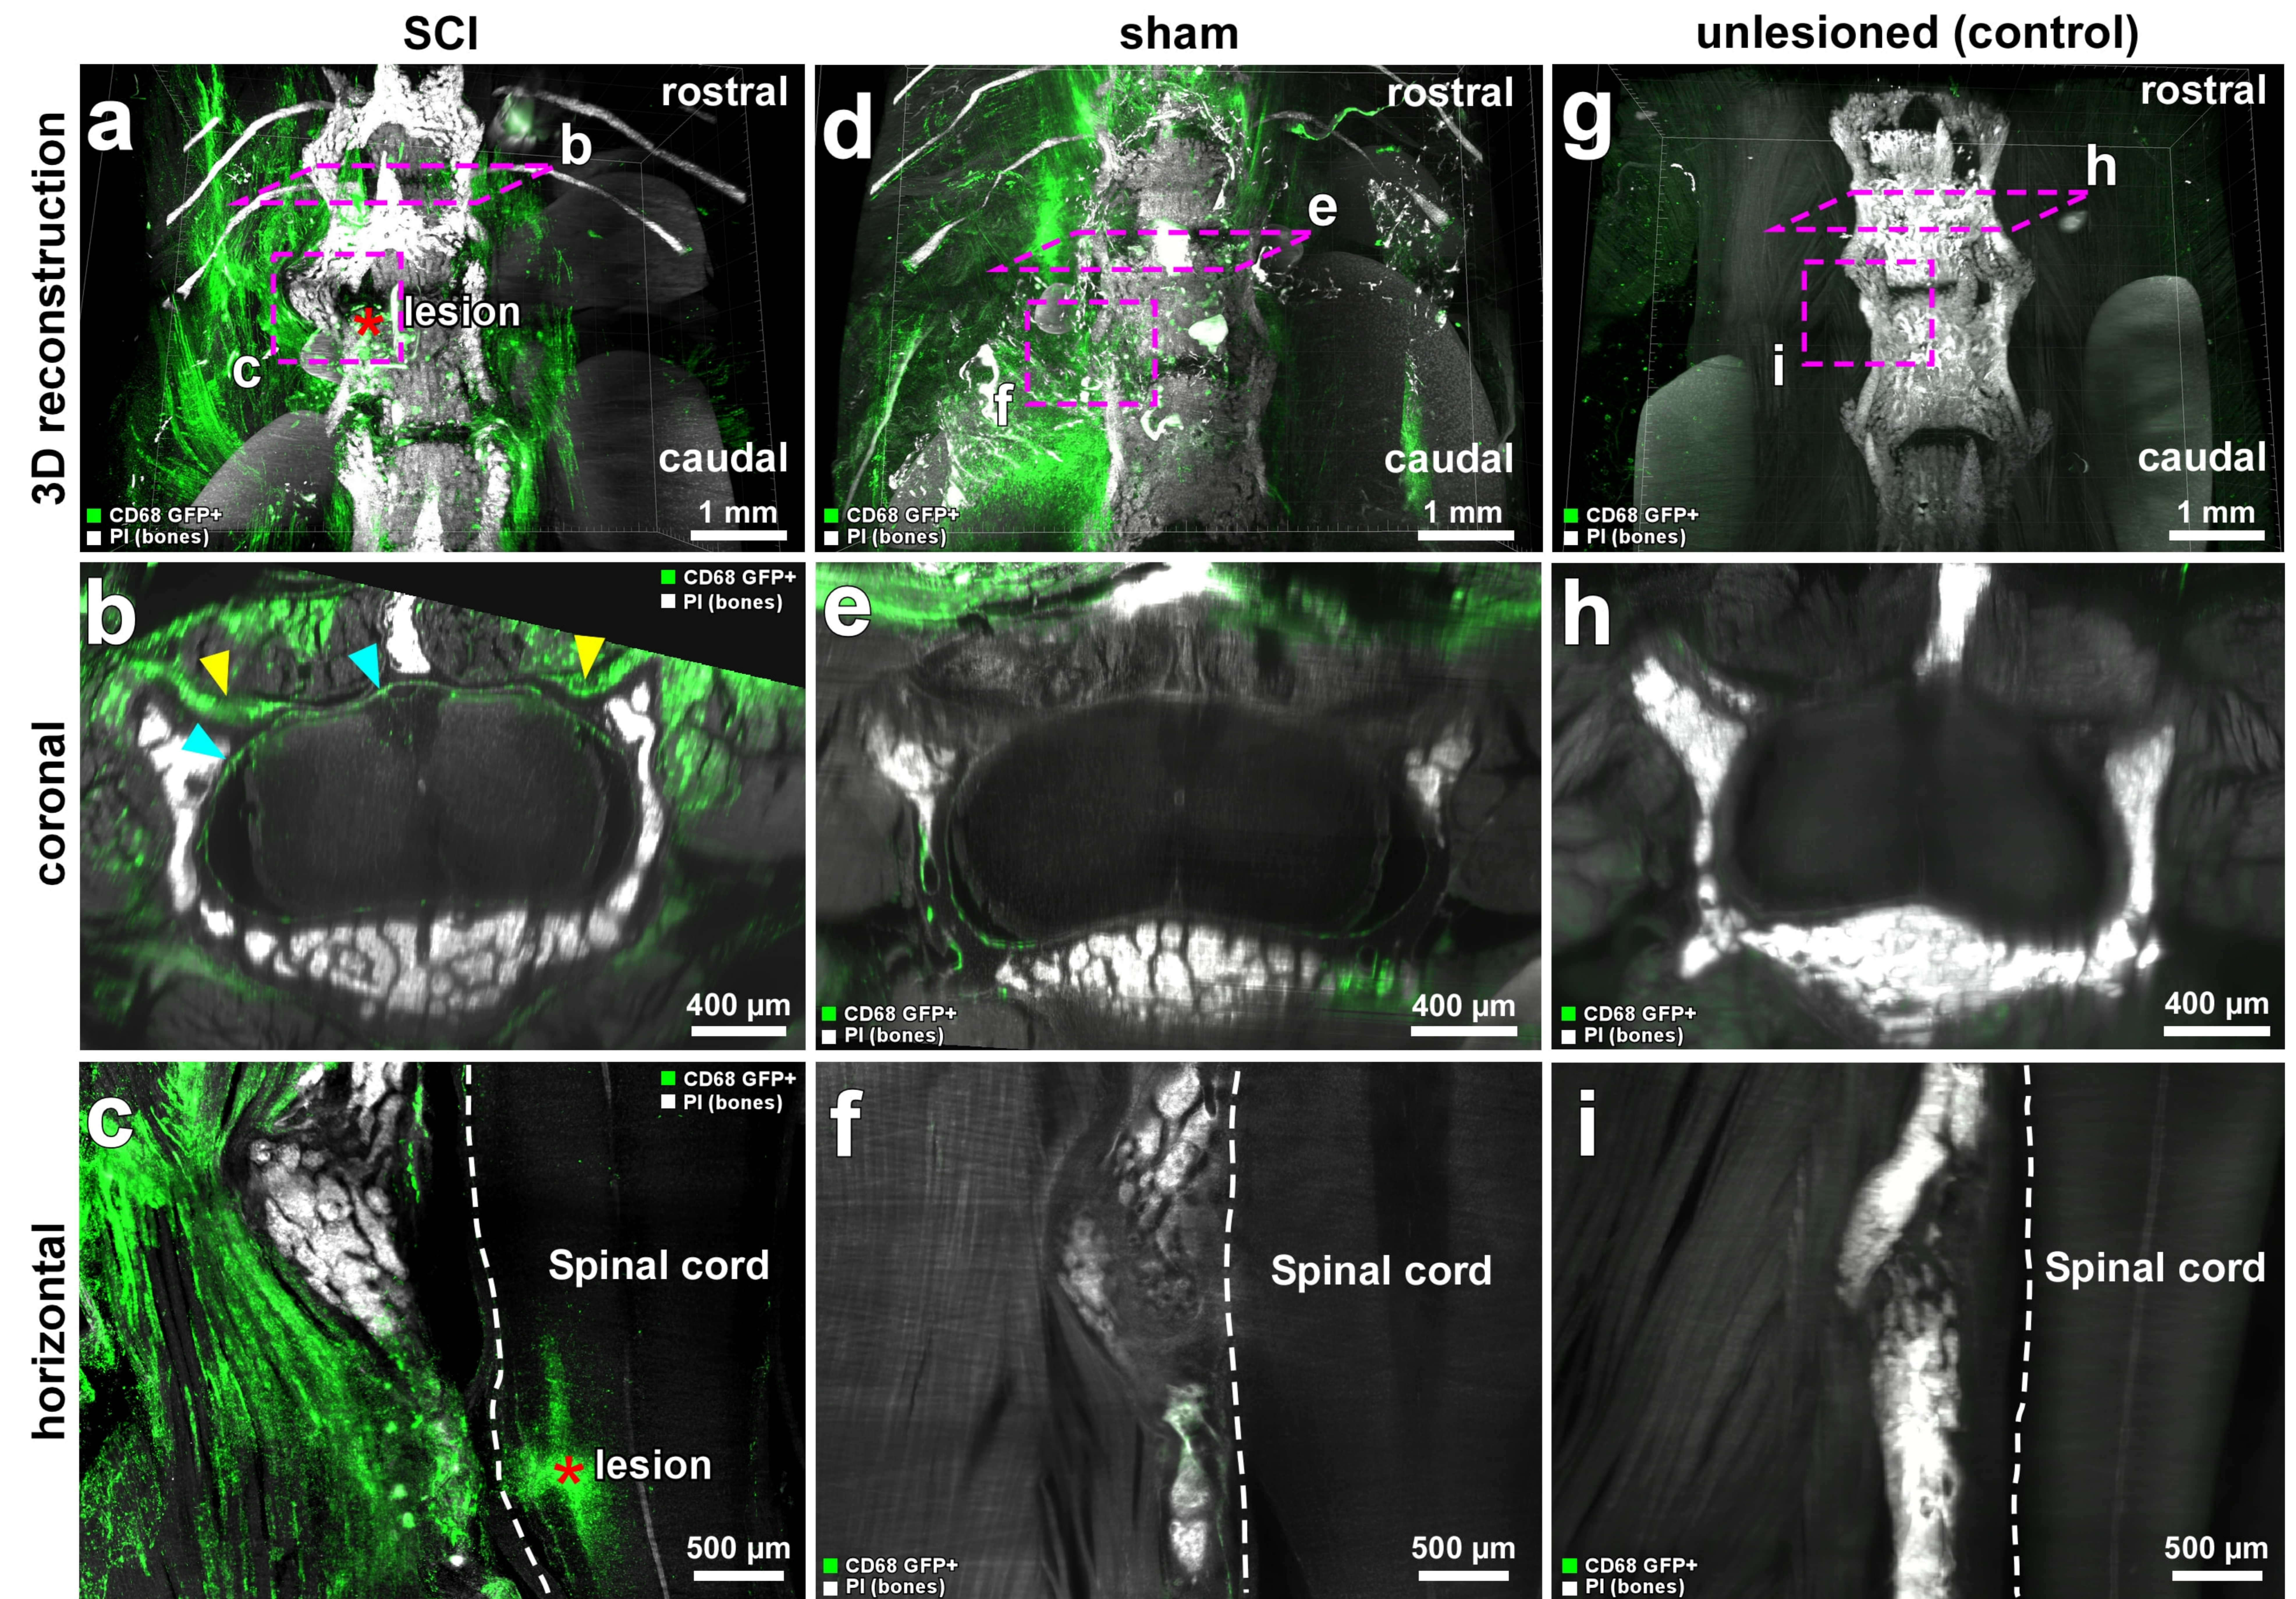

## Supplementary Figure 21

### Immune cell activation and invasion induced by spinal cord injury

3D visualization of spinal cord from 3 months old *CD68-EGFP* transgenic mice with spinal cord injury (**a-c**) compared to mice with sham surgery (**d-f**) and unlesioned controls (**g-i**). *CD68 GFP+* cells are shown in green and PI labeled bones in white. Red asterisks indicate the lesion site. Increased *CD68 GFP+* cells throughout the muscles, spinal cord roots (yellow arrow-heads) and meninges (cyan arrow-heads) are evident in the injured spinal cord (**a-c**) compared to the controls (**g-i**). In the group with sham surgery, the *CD68 GFP+* cells increased in the muscles but not in the spinal cord (similar results were observed from 3 independent mice per group). See also Supplementary Video 11.



## spinal cord

## muscle and bone

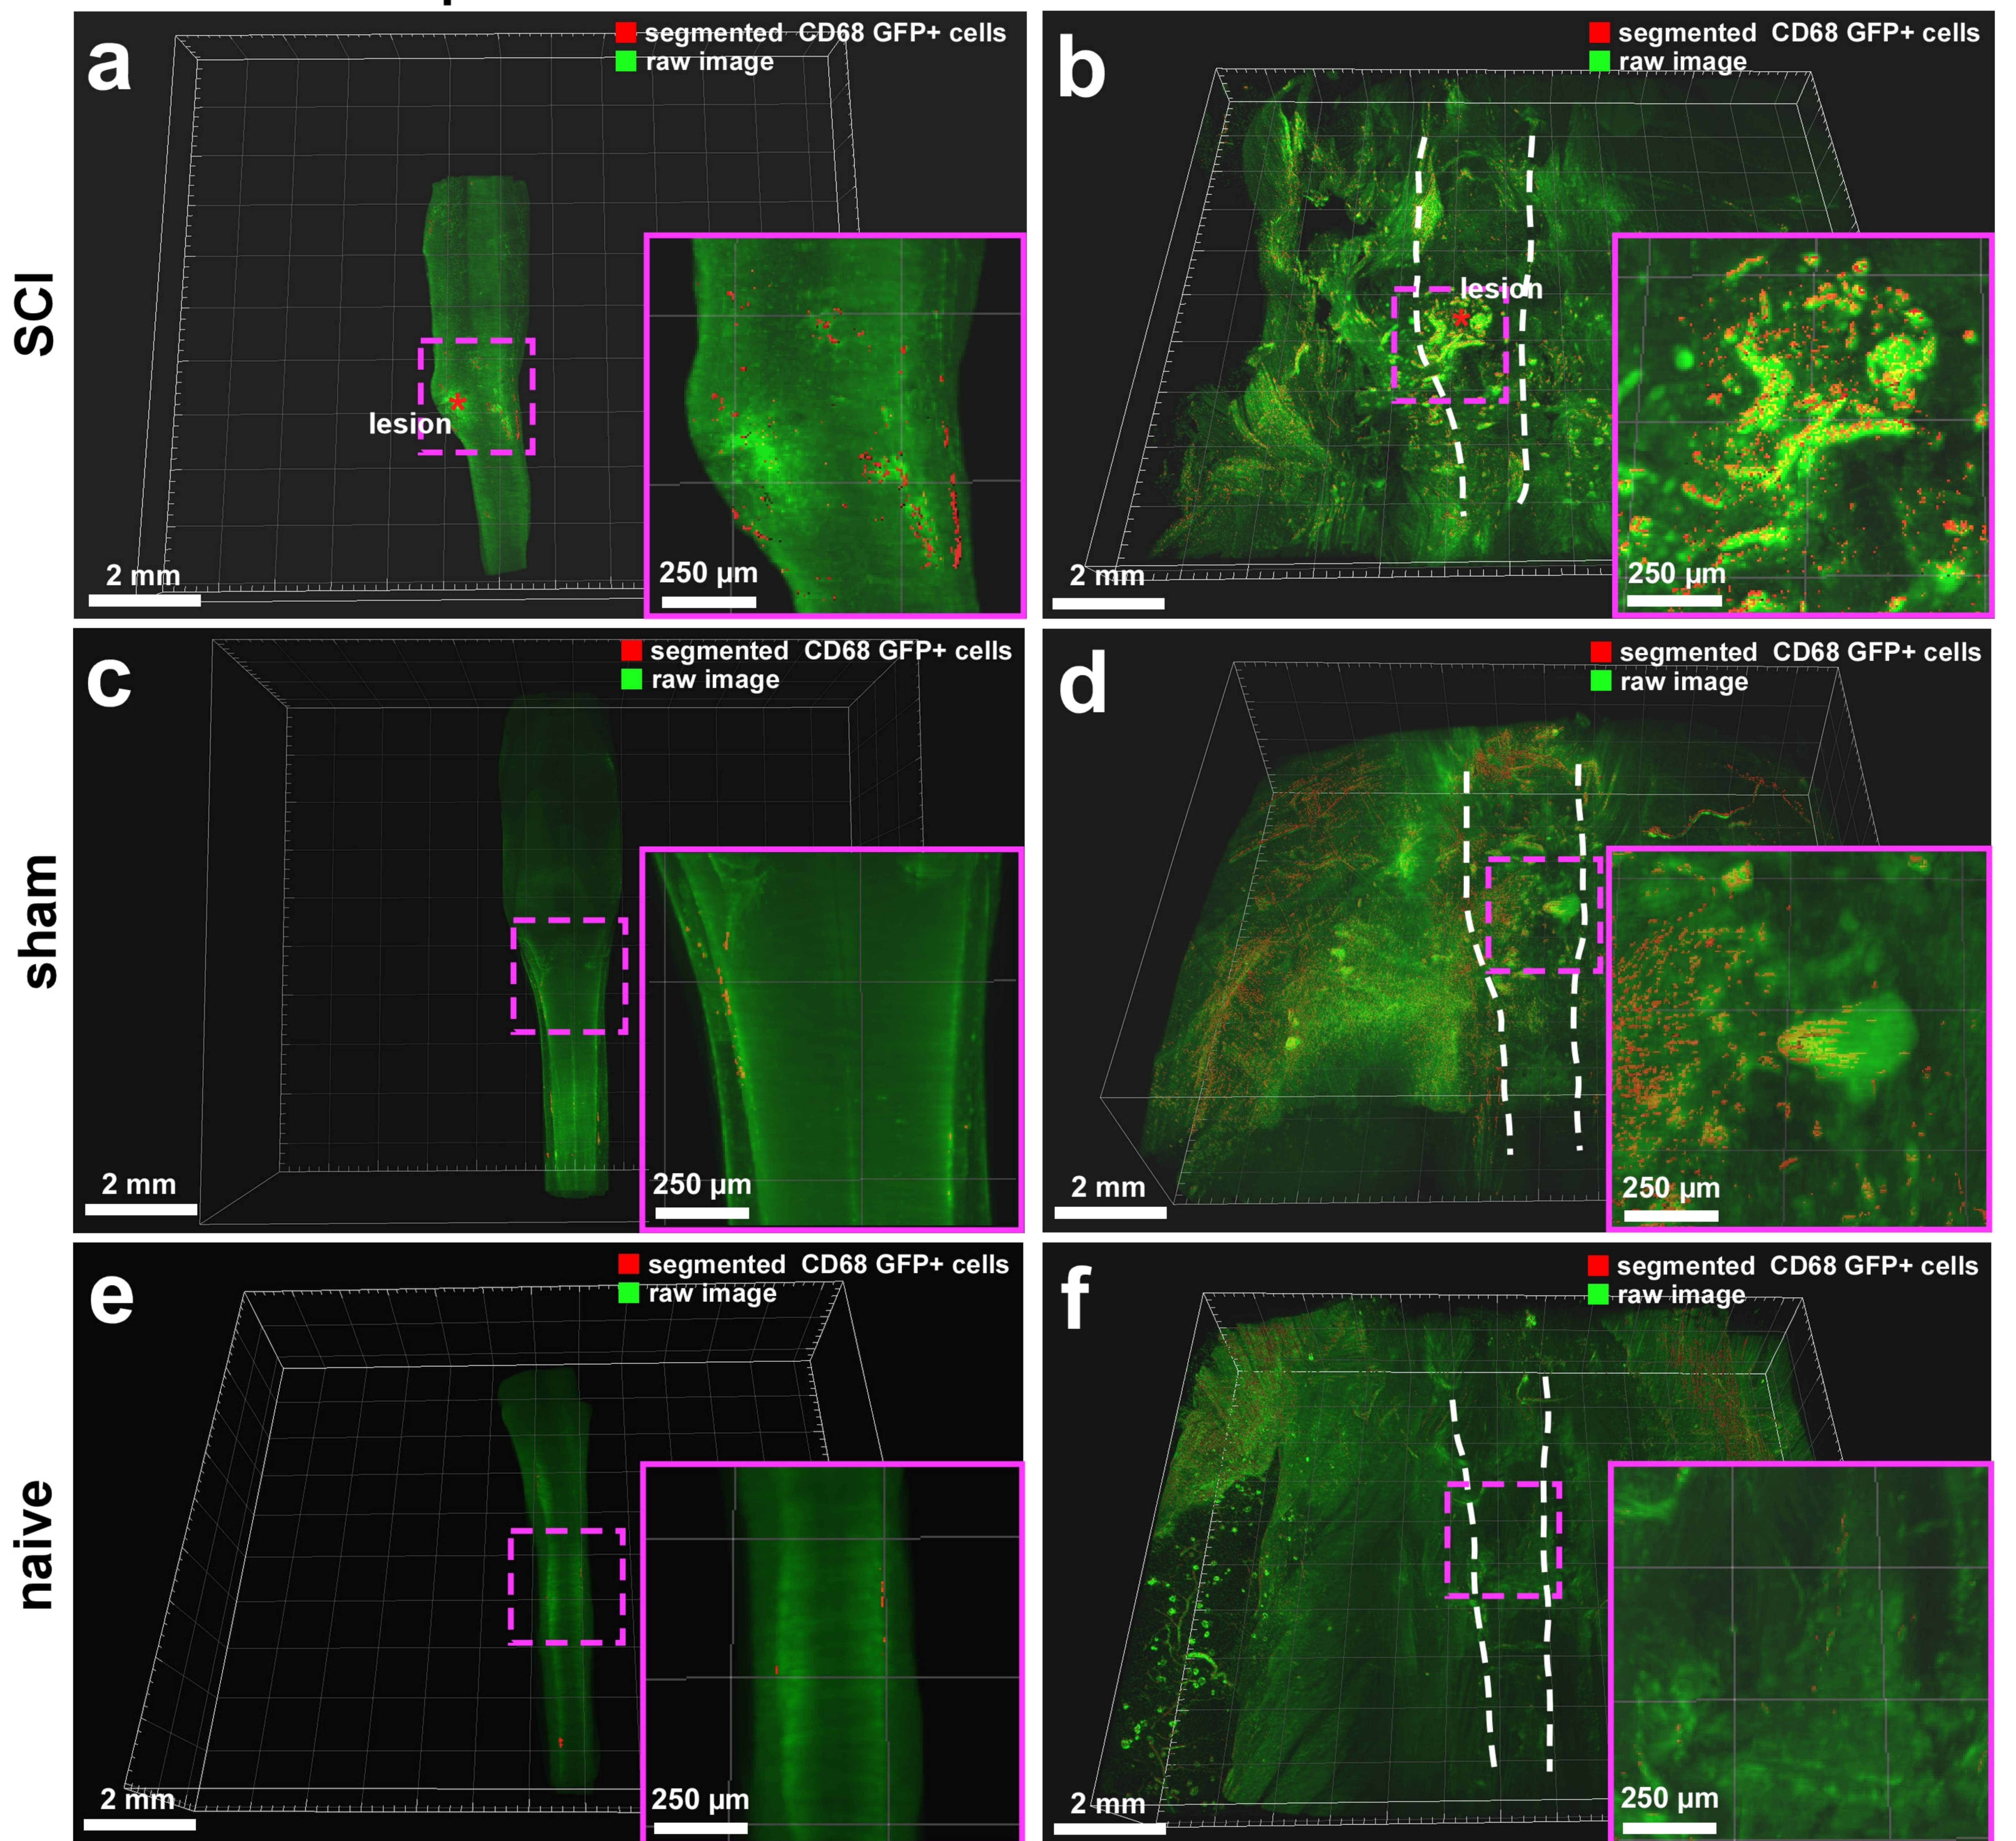

**g**

## spinal cord

## muscle and bone

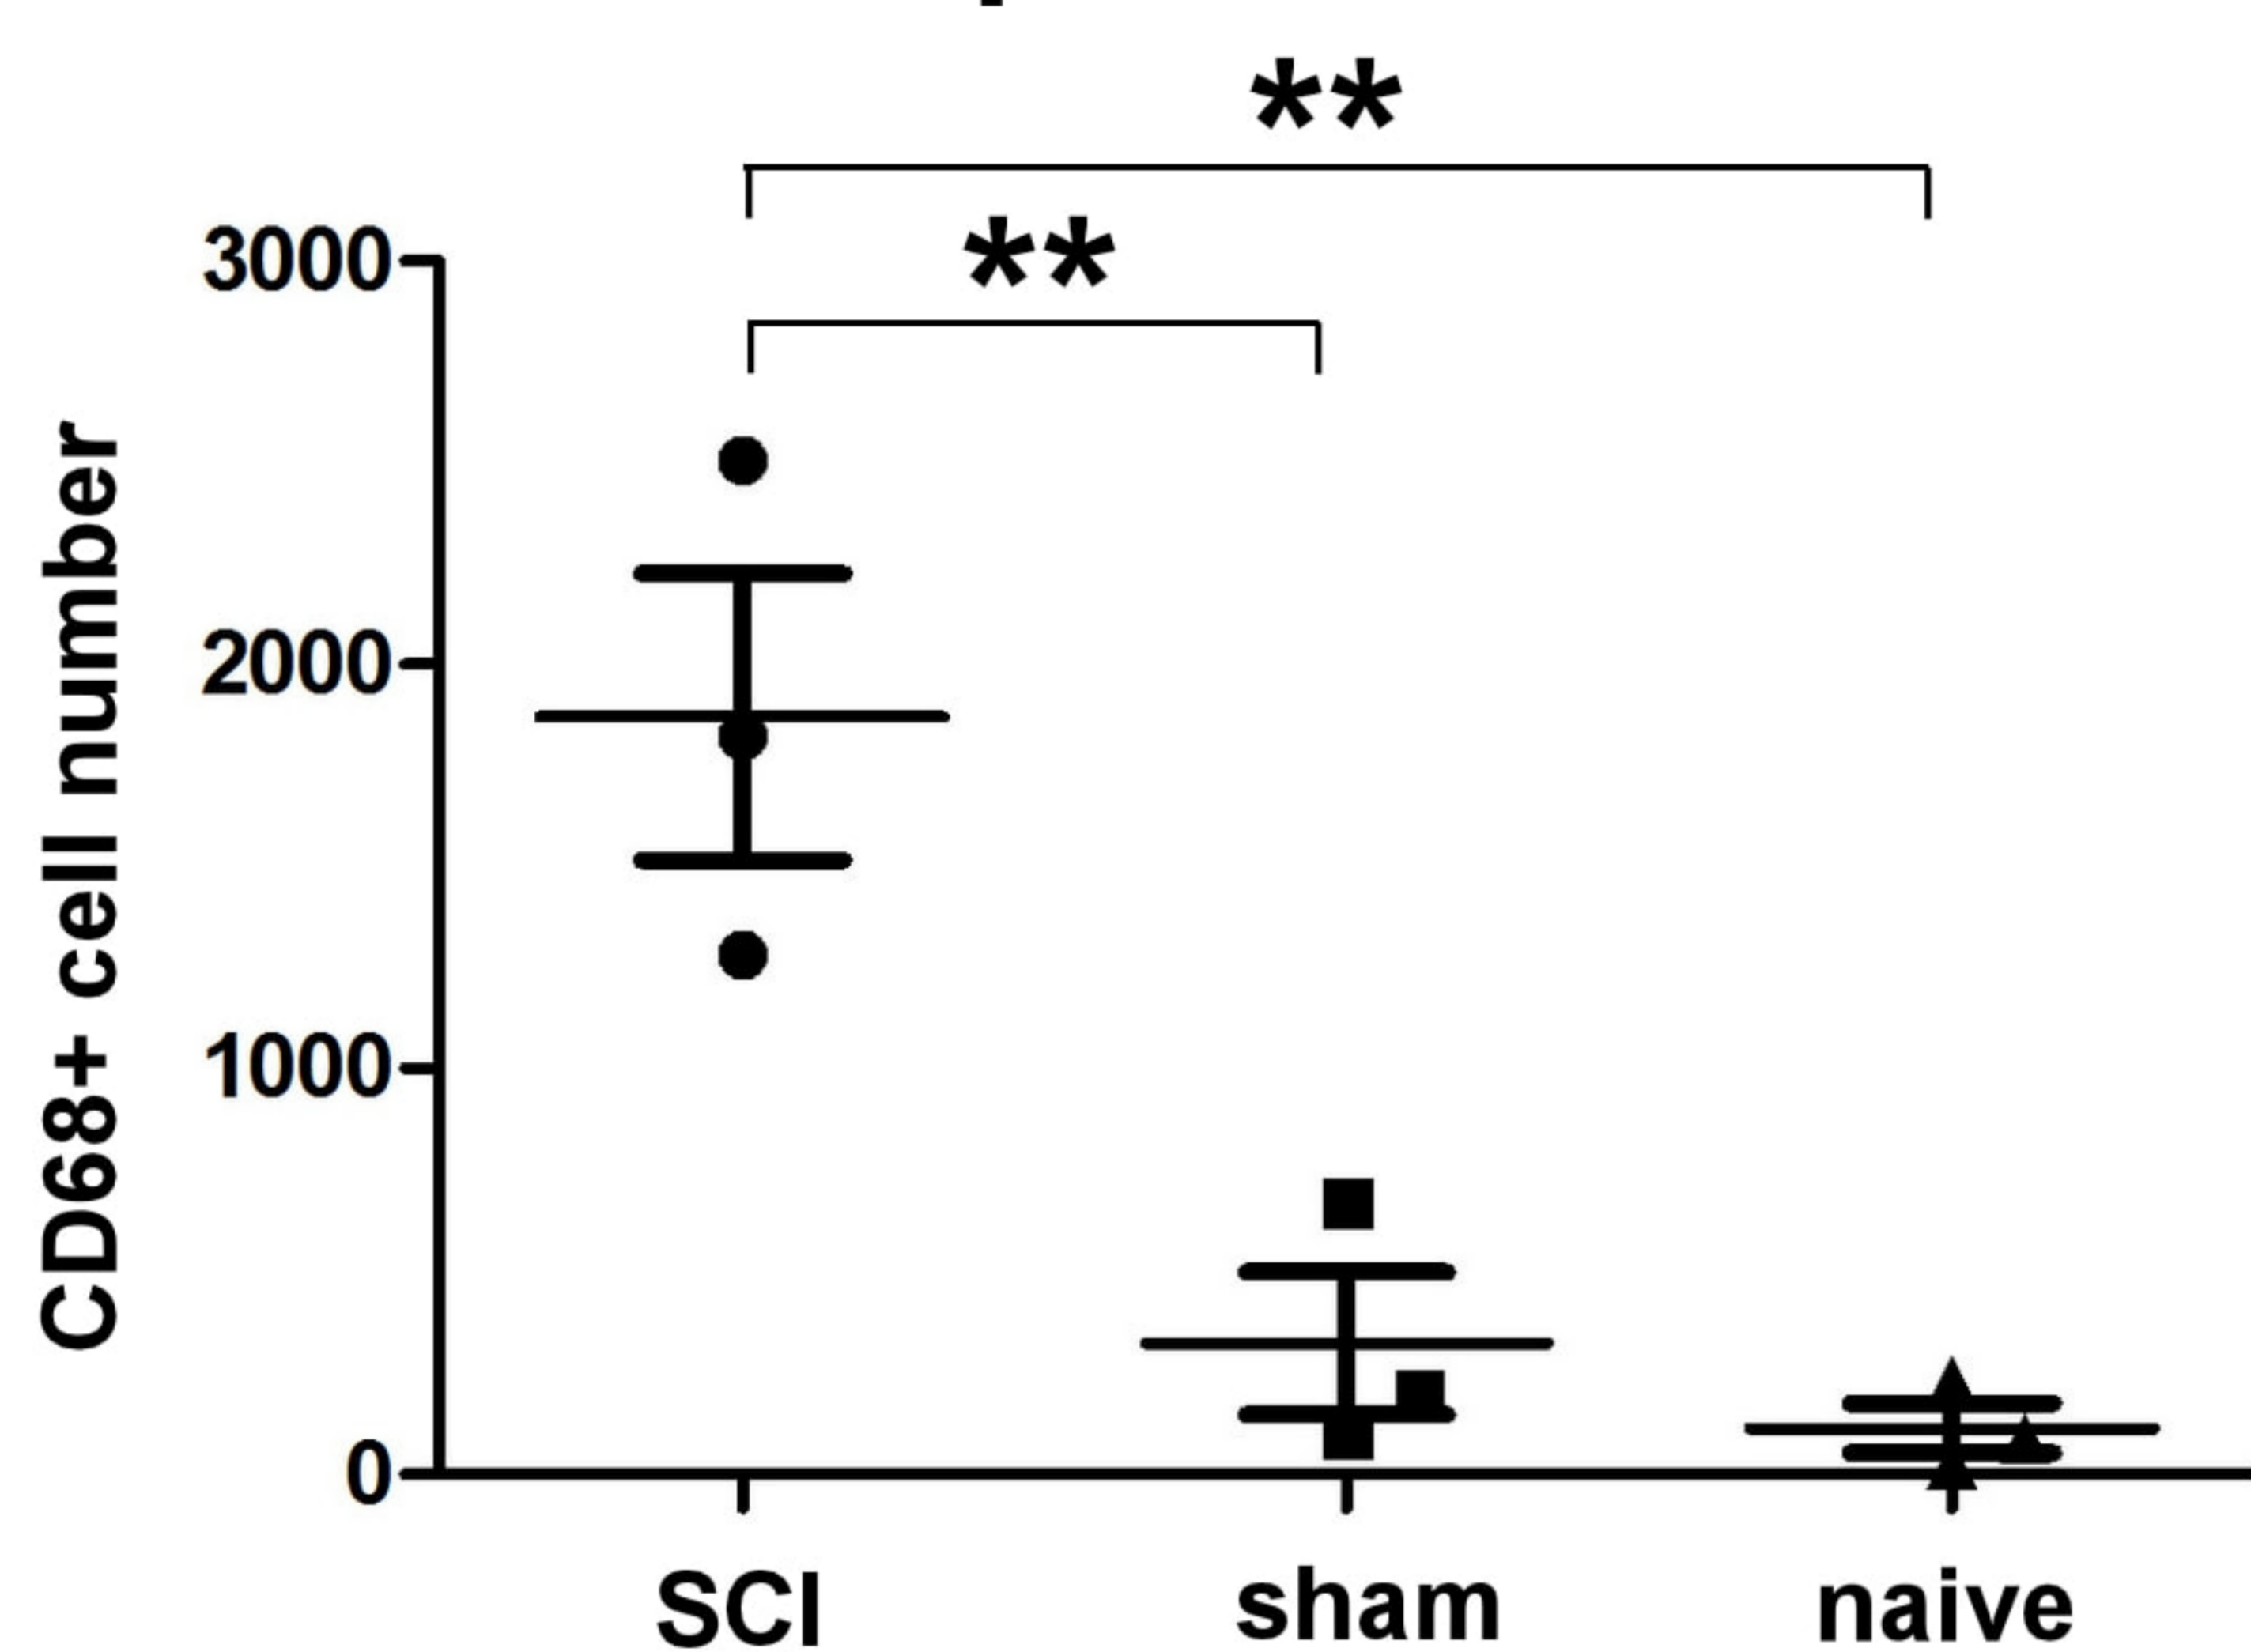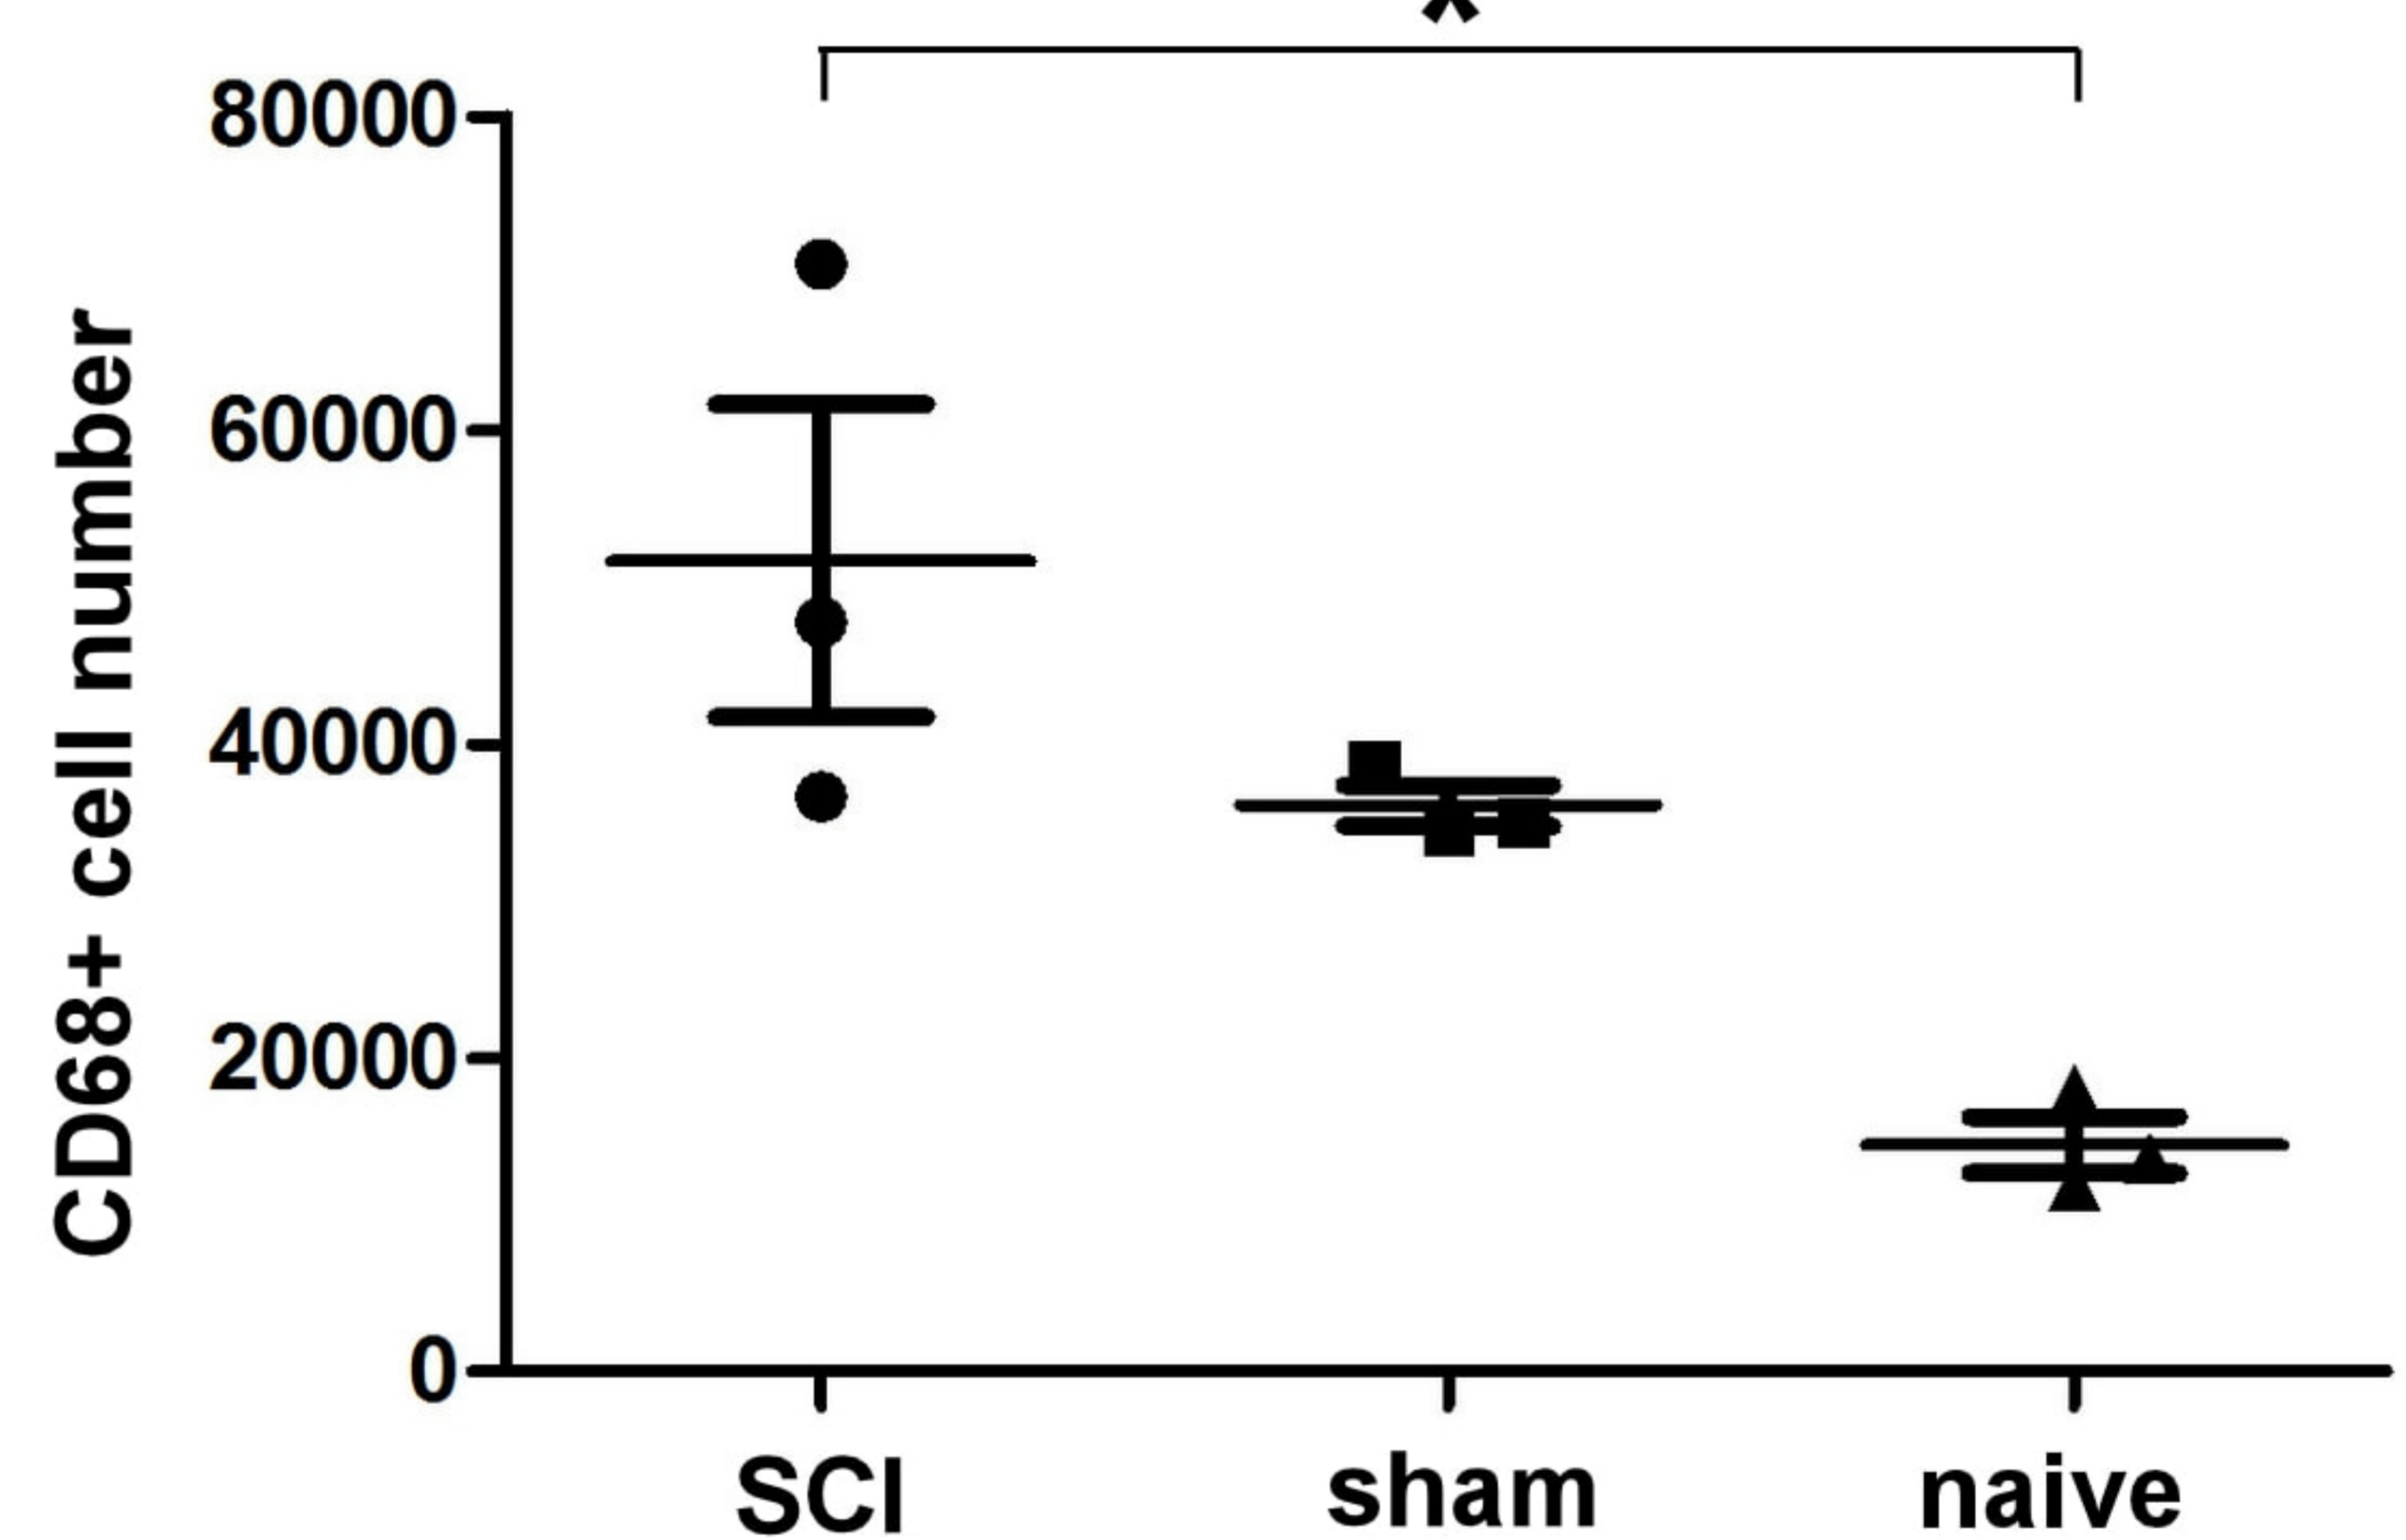

# Supplementary Figure 22

## CD68 GFP+ cell number increased significantly both in spinal cord and peripheral tissues after spinal cord injury (SCI)

(a-f) 3D visualization of the spine region from 3 months old *CD68-EGFP* mice with SCI (a,b) vs. mice with sham surgery (c,d) and naive mice (e,f) cleared by vDISCO and imaged by light-sheet microscope. To better visualize the region, spinal cords (a,c and e) were segmented out from their locations in the surrounding tissues (muscle and bone) (b,d and f) using Fiji and afterwards CD68 GFP+ cells were segmented (red) and quantified by IMARIS (similar results were observed from 3 independent mice per group). (g) Quantification of CD68 GFP+ cells in spinal cord showing significant cell number increase after SCI compared to sham and naive animals. While CD68 GFP+ cell number increased significantly in surrounding tissue (muscle and bone) in SCI group compared to naive animals (mean ± SEM; n=3 animals per group; statistical significance (for spinal cord,  $F_{2,6}=17.22$ , SCI vs. sham  $**p=0.0077$ , SCI vs. naive  $**p=0.0041$  and sham vs. naive ns=0.8049. For muscle and bone,  $F_{2,6}=10.05$ , SCI vs. sham ns=0.2273, SCI vs. naive  $*p=0.0101$  and sham vs. naive ns=0.0905) was assessed by one-way ANOVA followed by Tukey multiple comparison Test).



## DISSECTED ORGANS

| tissue type                                         | tissue type                                        |                                                     |                                                                           |
|-----------------------------------------------------|----------------------------------------------------|-----------------------------------------------------|---------------------------------------------------------------------------|
|                                                     | whole organs such as brain, heart or spleen        | soft and porous organs such as gut, lungs or thymus | small organs such as adrenal glands, lymphnodes, organoids or 1 mm slices |
| passive incubation (with shaking)                   |                                                    |                                                     |                                                                           |
| pretreatment with permeabilization solution at 37°C | 1-2 days                                           | overnight                                           | 6 hours                                                                   |
| incubation with immunostaining solution at 37°C     | 10-14 days                                         | 4-5 days                                            | 3-4 days                                                                  |
| washing with washing solution at room temperature   | 2 hours x 4 times (optionally last step overnight) | 1.5 hours x 4 times                                 | 1 hour x 4 times                                                          |
| PBS washing at room temperature                     | 2 hours x 4 times                                  | 1.5 hours x 4 times                                 | 1 hour x 4 times                                                          |
| DISCO clearing                                      |                                                    |                                                     |                                                                           |
| 50% THF at room temperature                         | 1-2 hours                                          | 1 hour                                              | 1 hour                                                                    |
| 70% THF at room temperature                         | 1-2 hours                                          | 1 hour                                              | 1 hour                                                                    |
| 80% THF at room temperature                         | 1-2 hours                                          | 1 hour                                              | 1 hour                                                                    |
| 100% THF at room temperature                        | 1 hour and overnight                               | 1 hour and overnight                                | 1 hour and 5 hours                                                        |
| 100% DCM at room temperature                        | 1 hour                                             | 45 minutes                                          | 30 minutes                                                                |
| BABB at room temperature                            | overnight                                          | > 6 hours                                           | > 4 hours                                                                 |
| cost per sample                                     | ~25-30 \$                                          | ~15-20 \$                                           | ~6-8 \$                                                                   |
| imaging time (light-sheet microscopy)               | ~1.5-3 hours                                       | ~3-6 hours                                          | ~0.5-1.5 hours                                                            |

## WHOLE BODY

|                                               | modality         | timing             | temperature                     |
|-----------------------------------------------|------------------|--------------------|---------------------------------|
| PBS washing                                   | active perfusion | overnight          | at room temperature             |
| decolorization with 25% CUBIC#1 in PBS        | active perfusion | 12 hours x 4 times | at room temperature             |
| PBS washing                                   | active perfusion | 3 hours x 3 times  | at room temperature             |
| decalcification with 10% of EDTA in PBS pH8-9 | active perfusion | 2 days             | at room temperature             |
| PBS washing                                   | active perfusion | 3 hours x 3 times  | at room temperature             |
| pretreatment with permeabilization solution   | active perfusion | 12 hours           | at room temperature             |
| boosting with immunostaining solution         | active perfusion | 6 days             | with infrared lamp (up to 30°C) |
| boosting with immunostaining solution         | passive shaking  | 2 days             | at 37°C                         |
| wash with washing solution                    | active perfusion | 3 hours x 3 times  | at room temperature             |
| PBS washing                                   | active perfusion | 3 hours x 3 times  | at room temperature             |
| DISCO clearing                                |                  |                    |                                 |
| 50% THF in distilled water                    | passive shaking  | 12 hours           | at room temperature             |
| 70% THF in distilled water                    | passive shaking  | 12 hours           | at room temperature             |
| 80% THF in distilled water                    | passive shaking  | 12 hours           | at room temperature             |
| 100% THF                                      | passive shaking  | 12 hours x 2 times | at room temperature             |
| 100% DCM                                      | passive shaking  | 3 hours            | at room temperature             |
| BABB                                          | passive shaking  | > 12 hours         | at room temperature             |
| cost per animal                               |                  | ~180-200 \$        |                                 |
| imaging time (light-sheet microscopy)         |                  | ~3-5 days          |                                 |

**permeabilization solution:** 1.5% goat serum , 0.5% Triton X-100, 0.5 mM Methyl-beta-cyclodextrin, 0.2% trans-1-Acetyl-4-hydroxy-L-proline, 0.05% Sodium Azide in 0.1 M PBS

**washing solution:** 1.5% goat serum , 0.5% Triton X-100, 0.05% Sodium Azide in 0.1 M PBS

**immunostaining solution:** permeabilization solution + nano booster

**THF:** tetrahydrofuran

**DCM :** dichloromethane

**BABB:** benzyl alcohol + benzyl benzoate (1:2) in volume

**CUBIC#1:** 25 wt% urea , 25 wt% N,N,N',N'-tetrakis (2-hydroxypropyl)ethylenediamine, 15 wt% Triton X-100 in 0.1 M PBS

## Supplementary Table 1

### Notes for vDISCO protocol

The timing for each experimental step can be shortened or extended based on tissue size to improve nano booster penetration or clearing performance. We found that active (perfusion mediated) whole-body boosting provides more homogeneous and even nano booster staining compared to passive staining of dissected organs e.g. the brain, if the perfusion is done properly. The costs were estimated only based on the reagents and considering organs from transgenic mouse lines that highly express GFP, such as *Thy1*-GFP. If other lines (which express less GFP) are used, the amount of nano booster needed for the protocol can be reduced and the cost might reduce significantly as well. The imaging time has been estimated considering the imaging only with one channel using the Ultramicroscope II (LaVision BioTec) with a 4x objective and it can significantly vary based on many factors: z-step, magnification, different microscope version etc. More information available at [www.discotechnologies.org/vDISCO](http://www.discotechnologies.org/vDISCO).



| FIGURES             |                                | SYSTEM       | OBJECTIVE SPECIFICATIONS |      |           |        | ACQUISITION PARAMETERS |                                         |                 |                                                 | DATA SIZE                      |
|---------------------|--------------------------------|--------------|--------------------------|------|-----------|--------|------------------------|-----------------------------------------|-----------------|-------------------------------------------------|--------------------------------|
|                     |                                |              | Magnification            | NA   | RI        | WD     | Zoom                   | Image pixel size                        | z-step          | type                                            |                                |
| <b>Figures</b>      |                                |              |                          |      |           |        |                        |                                         |                 |                                                 |                                |
| <b>1</b>            | a-f                            | UM II        | 4X corr.                 | 0.28 | 1.56      | 10mm   |                        | 1.625µmx1.625µm                         | 4µm             | single slice                                    | (a)24.8GB, (e)34.7GB           |
|                     | g,h                            | UM II        | 4X corr.                 | 0.28 | 1.56      | 10mm   |                        | 1.625µmx1.625µm                         | (i)8µm, (j)12µm | single slice                                    | (i)29.5GB, (j)9.90GB           |
|                     | i                              | UM II        | 4X corr.                 | 0.28 | 1.56      | 10mm   |                        | 1.625µmx1.625µm                         | 4-12µm          | quantification on single slice                  | 67GB                           |
|                     | j,l,n                          | UM II        | 4X corr.                 | 0.28 | 1.56      | 10mm   |                        | 1.625µmx1.625µm                         | 8-10 µm         | single slice                                    | (j,l)12.8GB, (n)6.94GB         |
|                     | k,m                            | UM II        | Oly. 25X                 | 0.95 | 1.31-1.52 | 4mm    |                        | 0.26µmx0.26µm                           | 4µm             | single slice                                    | (m)1.37GB, (o)222MB            |
|                     | o                              | UM II        | 4X corr.                 | 0.28 | 1.56      | 10mm   |                        | 1.625µmx1.625µm                         | 8µm             | single slice                                    | 456GB                          |
| <b>2</b>            | b-d                            | UM II -MVX10 | Oly. 1X                  | 0.25 | 1.0       | 65mm   | 0.63x                  | 10.32µmx10.32µm                         | 8µm             | 3D reconstruction                               | 3.27TB                         |
|                     | f-i                            | UM II -MVX10 | Oly. 2X                  | 0.5  | 1.33/1.56 | 6mm    | 1.6x                   | 2.03µmx2.03µm                           | 6µm             | 3D reconstruction                               | 1.5TB                          |
| <b>3</b>            | d                              | UM II        | 4X corr.                 | 0.28 | 1.56      | 10mm   |                        | 1.625µmx1.625µm                         | 8µm             | 3D reconstruction                               | 140GB                          |
|                     | e,g                            | LSM880       | Leica 25x                | 0.95 | 1.33      | 2.5mm  |                        | 0.67µmx0.67µm                           | 4µm             | (e) 3D reconstr., (g) single slice              | 3.89GB                         |
|                     | f,h                            | LSM880       | Leica 25x                | 0.95 | 1.33      | 2.5mm  |                        | 0.67µmx0.67µm                           | 4µm             | 96µm thick projection                           | same data from Fig.6e,g        |
|                     | j                              | UM II -MVX10 | Oly. 2X                  | 0.5  | 1.33/1.56 | 6mm    | 0.8x                   | 4.06µmx4.06µm                           | 8µm             | 1440µm thick projection                         | 117GB                          |
|                     | k                              | LSM880       | Leica 25x                | 0.95 | 1.33      | 2.5mm  |                        | 0.4µmx0.4µm                             | 2.50 µm         | 180µm thick projection                          | 2.45GB                         |
| <b>4</b>            | a-d                            | UM II -MVX10 | Oly. 1X                  | 0.25 | 1.0       | 65mm   | (a,c)1.25x, (b,d)0.63x | (a,c)5.2µmx5.2µm, (b,d)10.32µmx10.32µm  | 8µm             | entire scan projection                          | (a,c)52.2GB, (b,d)16.8GB       |
|                     | c,d (yellow, green rectangles) | UM II        | Zeiss 20x                | 1    | 1.45      | 5.6mm  |                        | 0.325µmx0.325µm                         | 2µm             | (c)824µm, (d)430µm thick projections            | (c)64.8GB, (d)62.7GB           |
|                     | e                              | UM II -MVX10 | Oly. 2X                  | 0.5  | 1.33/1.56 | 6mm    | 2.5x                   | 1.3µmx1.3µm                             | 8µm             | quantification entire scan projection           | 1TB                            |
| <b>5</b>            | b                              | UM II -MVX10 | Oly. 2X                  | 0.5  | 1.33/1.56 | 6mm    | 1x                     | 3.25µmx3.25µm                           | 8µm             | 1.6mm thick projection                          | 105GB                          |
|                     | c-e                            | UM II -MVX10 | Oly. 2X                  | 0.5  | 1.33/1.56 | 6mm    | 2x                     | 1.625µmx1.625µm                         | 10µm            | (c)600µm, (d) 500µm, (e)400µm thick projections | (c,e) 42.5GB, (d) 28.4GB       |
|                     | f                              | UM II -MVX10 | Oly. 2X                  | 0.5  | 1.33/1.56 | 6mm    | 2x                     | 1.625µmx1.625µm                         | 7µm             | 3D reconstruction                               | 87GB                           |
|                     | g,h                            | UM II        | Zeiss 20x                | 1    | 1.45      | 5.6mm  |                        | 0.325µmx0.325µm                         | 3µm             | 15µm thick projections                          | 552GB                          |
|                     | i,j                            | UM II -MVX10 | Oly. 2X                  | 0.5  | 1.33/1.56 | 6mm    | 2x                     | 1.625µmx1.625µm                         | 10µm            | single slices                                   | (i)102GB, (j)86.5GB            |
| <b>6</b>            | a                              | UM II        | 4X corr.                 | 0.28 | 1.56      | 10mm   | 2x                     | 0.8µmx0.8µm                             | 6µm             | 3D reconstruction                               | 5.8GB                          |
|                     | b-d                            | UM II -MVX10 | Oly. 1X                  | 0.25 | 1.0       | 65mm   | 3.2x                   | 2µmx2µm                                 | 8µm             | 80µm thick projections                          | 5.5GB                          |
|                     | e,f                            | UM II -MVX10 | Oly. 1X                  | 0.25 | 1.0       | 65mm   | 0.63x                  | 8µmx8µm                                 | 3µm             | single slices                                   | 77.9GB                         |
|                     | g,h                            | UM II -MVX10 | Oly. 2X                  | 0.5  | 1.33/1.56 | 6mm    | 1.6x                   | 2µmx2µm                                 | 8µm             | 40µm thick projections                          | (g)349GB, (h)550GB             |
|                     | i                              | UM II -MVX10 | Oly. 2X                  | 0.5  | 1.33/1.56 | 6mm    | 1.6x                   | 2µmx2µm                                 | 8µm             | quantification 40µm projection                  | 1.38 TB for 6 samples          |
| <b>Sup. Figures</b> |                                |              |                          |      |           |        |                        |                                         |                 |                                                 |                                |
| <b>S1</b>           | a                              | UM II -MVX10 | Oly. 1X                  | 0.25 | 1.0       | 65mm   | 1x                     | 6.5µmx6.5µm                             | 10µm            | single slice                                    | 9.37GB                         |
|                     |                                |              |                          |      |           |        |                        |                                         |                 |                                                 |                                |
| <b>S2</b>           | a-f                            | UM II        | 4X corr.                 | 0.28 | 1.56      | 10mm   |                        | 1.625µmx1.625µm                         | 10-12 µm        | 40-48µm thick projection                        | (a,b,c)30.2GB, (d,e,f) 31.7 GB |
|                     | g                              | UM II        | 4X corr.                 | 0.28 | 1.56      | 10mm   |                        | 1.625µmx1.625µm                         | 8-16 µm         | quantification single slide                     | 71.31GB                        |
| <b>S3</b>           | a-d                            | AxioZoom     | Zeiss 1X                 | 0.25 | 1.0       | 56mm   |                        | (a,b)1.14µmx1.14µm, (c,d) 1.82µmx1.82µm | n.a.            | single slice                                    | 5.46MB x 4= 21.84MB            |
|                     | e,f                            | UM II        | 4X corr.                 | 0.28 | 1.56      | 10mm   |                        | 1.625µmx1.625µm                         | 10µm            | 50µm thick projection                           | (e)43.01GB, (f)5.93GB          |
|                     | g-i                            | UM II        | 4X corr.                 | 0.28 | 1.56      | 10mm   |                        | 1.625µmx1.625µm                         | 10µm            | quantification single slice                     | same data from Fig.S3e,f       |
| <b>S4</b>           | a-e                            | UM II        | Zeiss 20x                | 1    | 1.45      | 5.6mm  |                        | 0.325µmx0.325µm                         | 2µm             | 800 µm thick projection, 3D reconstr.           | 193.1GB                        |
| <b>S5</b>           |                                | UM II        | Zeiss 20x                | 1    | 1.45      | 5.6mm  |                        | 0.325µmx0.325µm                         | 2µm             | 800 µm thick projection, 3D reconstr.           | same data as Fig.S4            |
| <b>S6</b>           | a-c                            | UM II        | 4X corr.                 | 0.28 | 1.56      | 10mm   |                        | 1.625µmx1.625µm                         | 4µm             | 3D reconstr. 8µm, thick projection              | 2.1GB                          |
| <b>S7</b>           | a,h-k                          | UM II        | 4X corr.                 | 0.28 | 1.56      | 10mm   |                        | 1.625µmx1.625µm                         | 10µm            |                                                 | 118.1 GB                       |
|                     | d,g                            | UM II        | 4X corr.                 | 0.28 | 1.56      | 10mm   |                        | 1.625µmx1.625µm                         | 3µm             | single slice                                    | 32 GB                          |
| <b>S9</b>           | c                              | AxioZoom     | Zeiss 1X                 | 0.25 | 1.0       | 56mm   |                        | 6.49µmx6.49µm, zoom in 0.405µmx0.405µm  | n.a.            | single slice                                    | 106MB                          |
| <b>S11</b>          | c-j                            | UM II -MVX10 | Oly. 2X                  | 0.5  | 1.33/1.56 | 6mm    | 0.63x                  | 5.16µmx5.16µm                           | 8-20µm          | quantification on single slice                  | 117.1GB                        |
| <b>S12</b>          | c-g                            | UM II        | 4X corr.                 | 0.28 | 1.56      | 10mm   |                        | 1.625µmx1.625µm                         | 8µm             | single slices                                   | 10-50GB for each sample        |
| <b>S13</b>          | b-g                            | UM II -MVX10 | Oly. 2X                  | 0.5  | 1.33/1.56 | 6mm    | 4x                     | 0.81µmx0.81µm                           | 6µm             | single slice                                    | 10.6GB                         |
|                     | h-j                            | LSM880       | Leica 25x                | 0.95 | 1.33      | 2.5mm  |                        | 0.10µmx0.10µm                           | 2.5µm           | single slice                                    | 120MB                          |
| <b>S14</b>          | a-i                            | UM II -MVX10 | Oly. 1X                  | 0.25 | 1         | 65mm   | 0.63x                  | 10.32µmx10.32µm                         | 8µm             | 3D reconstruction                               | same data from Fig. 2b-d       |
| <b>S15</b>          | a-e                            | UM II -MVX10 | Oly. 1X                  | 0.25 | 1         | 65mm   | 1x                     | 6.5µmx6.5µm                             | 10µm            | 3D reconstruction                               | 24GB                           |
| <b>S16</b>          | a-c                            | UM II -MVX10 | Oly. 2X                  | 0.5  | 1.33/1.56 | 6mm    | 1.25x                  | 2.6µmx2.6µm                             | 4µm             | 3D reconstruction                               | 39GB                           |
| <b>S17</b>          | a                              | UM II        | 4X corr.                 | 0.28 | 1.56      | 10mm   |                        | 1.625µmx1.625µm                         | 8µm             | entire scan projection                          | 57.8GB                         |
|                     | b-d                            | UM II        | 4X corr.                 | 0.28 | 1.56      | 10mm   |                        | 1.625µmx1.625µm                         | 8µm             | 80µm thick projection                           | same data from Fig S17a        |
|                     | e                              | UM II        | 4X corr.                 | 0.29 | 1.57      | 10mm   |                        | 1.625µmx1.625µm                         | 8µm             | 80µm thick projection                           | 42.1 GB                        |
| <b>S18</b>          | a                              | UM II -MVX10 | Oly. 2X                  | 0.5  | 1.33/1.56 | 6mm    | 1x                     | 3.25µmx3.25µm                           | 8µm             | 1.6mm thick projection                          | same data from Fig. 5b         |
|                     | b-d                            | UM II -MVX10 | Oly. 2X                  | 0.5  | 1.33/1.56 | 6mm    | 2x                     | 1.625µmx1.625µm                         | 10µm            | (b)600µm, (c) 500µm, (d)400µm thick projections | same data from Fig. 5c-e       |
|                     | e-g                            | UM II -MVX10 | Oly. 2X                  | 0.5  | 1.33/1.56 | 6mm    | 2x                     | 1.625µmx1.625µm                         | 6µm             | 1.6mm thick projection                          | 61GB                           |
| <b>S19</b>          | a,b                            | UM II        | 4X corr.                 | 0.29 | 1.57      | 10mm   |                        | 1.625µmx1.625µm                         | 8µm             | (a) 1.92mm, (b)640µm thick projections          | 474GB                          |
|                     | c-e                            | UM II -MVX10 | Oly. 1X                  | 0.25 | 1         | 65mm   | 2x                     | 3.25µmx3.25µm                           | 10µm            | 800 µm thick projections                        | 103GB                          |
|                     | f-g                            | UM II -MVX10 | Oly. 1X                  | 0.25 | 1         | 65mm   | 3.2x                   | 2µmx2µm                                 | 8µm             | 240µm thick projections                         | 18GB                           |
| <b>S20</b>          | a,b                            | LSM880       | Zeiss 40X                | 1.3  | 1.518     | 0.21mm | 1x                     | 0.21µmx0.21µm                           | 4µm             | 3D reconstruction                               | 13GB                           |
| <b>S21</b>          | a,d,g                          | UM II -MVX10 | Oly. 2X                  | 0.5  | 1.33/1.56 | 6mm    | 1.6x                   | 2µmx2µm                                 | 6µm             | 3D reconstructions                              | (a)232GB, (d)114GB, (g)199GB   |
|                     | b,e,h                          | UM II -MVX10 | Oly. 2X                  | 0.5  | 1.33/1.56 | 6mm    | 1.6x                   | 2µmx2µm                                 | 6µm             | 30µm thick projections                          | (b)232GB, (e)114GB, (h)199GB   |
|                     | c,f,i                          | UM II -MVX10 | Oly. 2X                  | 0.5  | 1.33/1.56 | 6mm    | 1.6x                   | 2µmx2µm                                 | 6µm             | single slices                                   | (c)232GB, (f)114GB, (i)199GB   |
| <b>S22</b>          | a,b                            | UM II -MVX10 | Oly. 2X                  | 0.5  | 1.33/1.56 | 6mm    | 1.6x                   | 2µmx2µm                                 | 6µm             | 3D reconstructions                              | 18GB                           |
|                     | c,d                            | UM II -MVX10 | Oly. 2X                  | 0.5  | 1.33/1.56 | 6mm    | 1.6x                   | 2µmx2µm                                 | 6µm             | 3D reconstructions                              | 62GB                           |
|                     | e,f                            | UM II -MVX10 | Oly. 2X                  | 0.5  | 1.33/1.56 | 6mm    | 1.6x                   | 2µmx2µm                                 | 6µm             | 3D reconstructions                              | 73GB                           |
|                     | g                              | UM II -MVX10 | Oly. 2X                  | 0.5  | 1.33/1.56 | 6mm    | 1.6x                   | 2µmx2µm                                 | 6µm             | quantification on 3d reconstructions            | 3.35TB for 9 samples           |

### Legend of abbreviations

#### Imaging Systems

UM II LaVision BioTec - UltraMicroscope II  
UM II -MVX10 LaVision BioTec - UltramicroscopeM II -MVX10  
LSM880 Zeiss confocal LSM880 with Airyscan  
AxioZoom Zeiss AxioZoom EMS3/SyCoP3

#### Objectives

Oly. 1X Olympus MV PLAPO 1x/0.25 NA  
Oly. 2X Olympus MVPLAPO2XC  
4X corr. Olympus XLFLUOR4x corrected  
Oly. 25X Olympus XLPLN25X

NA Numerical aperture  
RI Refractive Index  
WD Working distance  
n.a. not applicable

Zeiss 20X Zeiss Clr Plan-Neofluar 20x  
Zeiss 40X Zeiss ECPlan-NeoFluar 40x/1.30 Oil DIC M27  
Leica 25X Leica HCX IRAPO L 25x

# Supplementary Table 2

## Imaging specifications
